# Supplementary material
Source: PubMed Central journal article supplement (PMC5238514)
Supplement: NIHMS840444-supplement-Supplemental.pdf [file NIHMS840444-supplement-Supplemental.pdf]

**Supporting Information**

**Polymeric Nanovehicle Regulated Spatiotemporal  
Real-Time Imaging of the Differentiation Dynamics  
of Transplanted Neural Stem Cells after Traumatic  
Brain Injury**

Zhe Wang, Yu Wang, Zhiyong Wang, Jun Zhao, J. Silvio Gutkind, Avinash Srivatsan, Guofeng Zhang, Hsien-Shun Liao, Xiao Fu, Albert Jin, Xiao Tong, Gang Niu, Xiaoyuan Chen

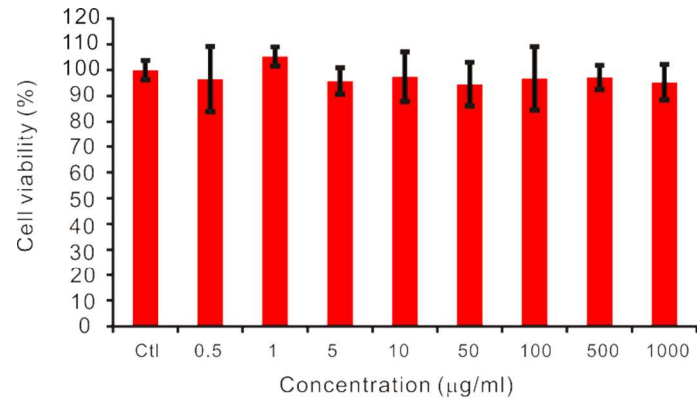

Figure S1. MTT assay of nanovehicle (0.5-1000 µg/mL) to neural stem cells after incubation for 48 h (n = 6).

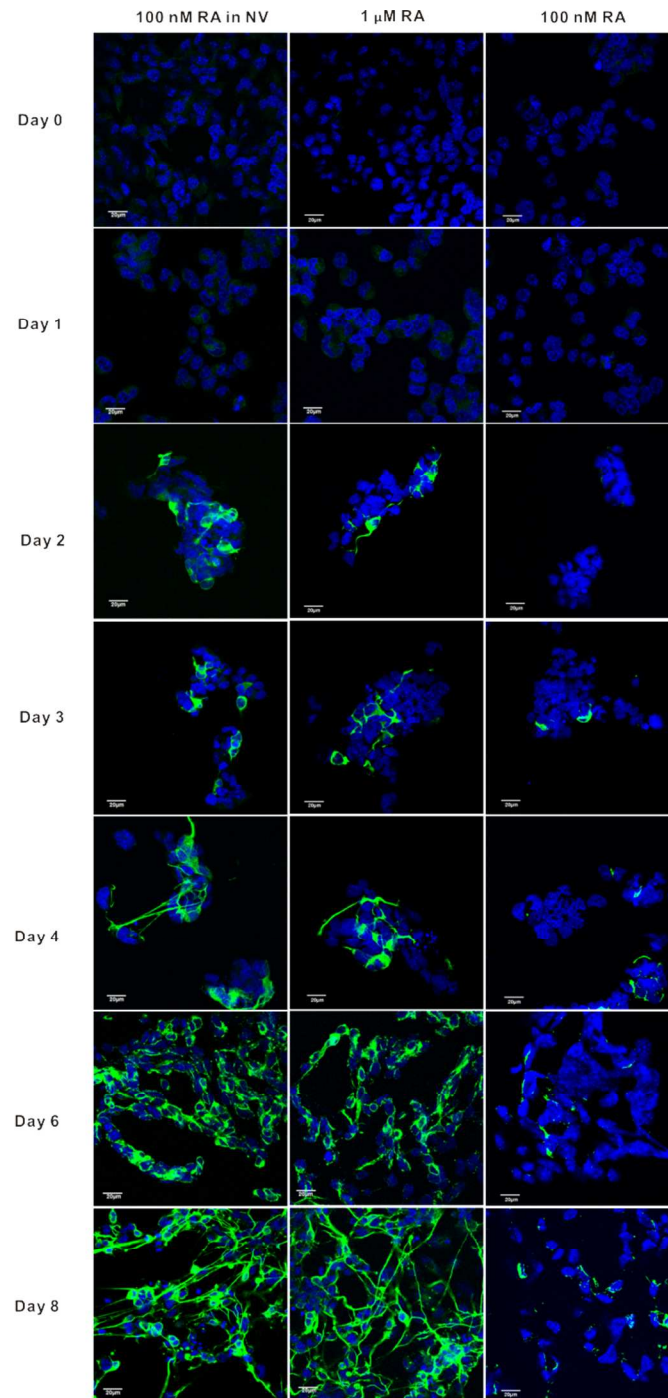

Figure S2. Chronological  $\beta$ III tubulin protein expression of neural stem cells under different stimulation conditions. RA: retinoic acid; NV: nanovehicle. Scale bar = 20  $\mu$ m.

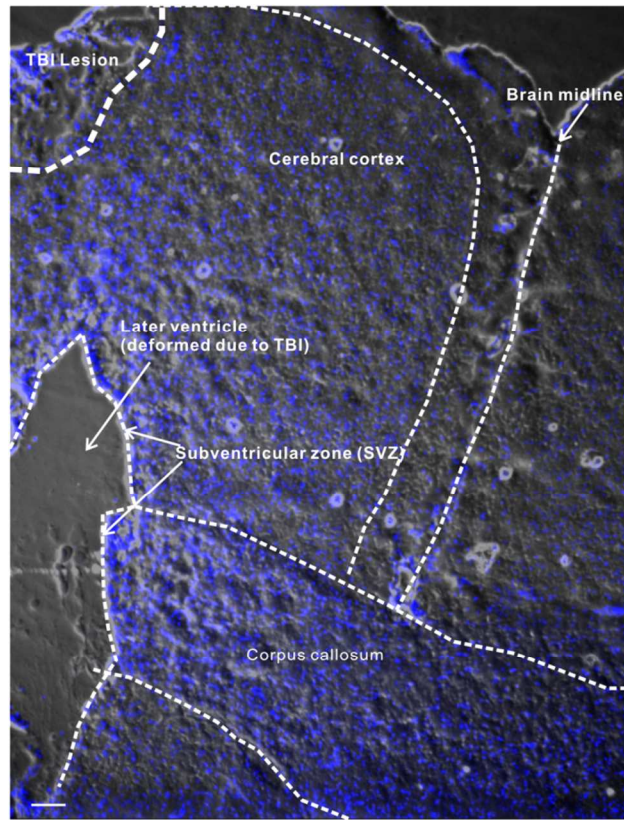

Figure S3. The overview of TBI brain section.

| GeneSymb  | Health   | TBI      | NSC      | TBI-NSC  | TBI-Health | NSC-Health | flag1 |
|-----------|----------|----------|----------|----------|------------|------------|-------|
| Rgn       | 11.92967 | 4.933549 | 5.274742 | 5.104146 | -6.99613   | -6.65493   | 2     |
| Cdx4      | 8.251138 | 2.337589 | 4.149692 | 3.24364  | -5.91355   | -4.10145   | 2     |
| Nim1      | 12.52169 | 6.756828 | 7.464011 | 7.11042  | -5.76486   | -5.05768   | 2     |
| Mia2      | 8.027189 | 2.337589 | 4.823383 | 3.580486 | -5.6896    | -3.20381   | 2     |
| 3110009F2 | 7.852686 | 2.337589 | 4.074207 | 3.205898 | -5.5151    | -3.77848   | 2     |
| Ppp4r2    | 7.811058 | 2.337589 | 6.188757 | 4.263173 | -5.47347   | -1.6223    | 1     |
|           | 7.747962 | 2.337589 | 6.098997 | 4.218293 | -5.41037   | -1.64896   | 1     |
| Gm11541   | 7.462582 | 2.337589 | 4.777475 | 3.557532 | -5.12499   | -2.68511   | 2     |
| AA763515  | 7.252178 | 2.337589 | 6.816843 | 4.577216 | -4.91459   | -0.43534   | 1     |
| C730002L0 | 9.154649 | 4.37619  | 6.842811 | 5.6095   | -4.77846   | -2.31184   | 2     |
| Erg       | 7.09551  | 2.337589 | 5.752885 | 4.045237 | -4.75792   | -1.34262   | 1     |
| Eda2r     | 6.976841 | 2.337589 | 4.725915 | 3.531752 | -4.63925   | -2.25093   | 2     |
|           | 7.783977 | 3.21099  | 3.808678 | 3.509834 | -4.57299   | -3.9753    | 2     |
| Npas4     | 14.09444 | 9.561727 | 10.52009 | 10.04091 | -4.53271   | -3.57435   | 2     |
|           | 6.778178 | 2.337589 | 4.170146 | 3.253867 | -4.44059   | -2.60803   | 2     |
|           | 6.739864 | 2.337589 | 4.25676  | 3.297174 | -4.40228   | -2.4831    | 2     |
| Zfp395    | 7.321386 | 2.982113 | 6.117605 | 4.549859 | -4.33927   | -1.20378   | 1     |
| Tbx22     | 6.650797 | 2.337589 | 7.015115 | 4.676352 | -4.31321   | 0.364318   | 1     |
| Klhl31    | 6.627842 | 2.337589 | 4.894597 | 3.616093 | -4.29025   | -1.73325   | 1     |
| Trim5     | 6.553167 | 2.337589 | 3.934488 | 3.136038 | -4.21558   | -2.61868   | 2     |
| Mbl2      | 7.625184 | 3.509696 | 4.611227 | 4.060462 | -4.11549   | -3.01396   | 2     |
| Olfr1226  | 6.417416 | 2.337589 | 6.322223 | 4.329906 | -4.07983   | -0.09519   | 1     |
| Slc22a15  | 8.432885 | 4.469188 | 4.699285 | 4.584236 | -3.9637    | -3.7336    | 2     |
| Sprtn     | 8.434042 | 4.481246 | 4.15978  | 4.320513 | -3.9528    | -4.27426   | 2     |
|           | 6.286188 | 2.337589 | 3.893716 | 3.115652 | -3.9486    | -2.39247   | 2     |
| Ttpa      | 6.593222 | 2.666132 | 4.379665 | 3.522899 | -3.92709   | -2.21356   | 2     |
| Gm20867   | 7.535679 | 3.696257 | 4.076555 | 3.886406 | -3.83942   | -3.45912   | 2     |
| Son       | 8.830904 | 5.020952 | 4.638427 | 4.829689 | -3.80995   | -4.19248   | 2     |
| Ino80b    | 8.943294 | 5.204048 | 5.834234 | 5.519141 | -3.73925   | -3.10906   | 2     |
| Fnd3c2    | 8.536467 | 4.799212 | 5.19788  | 4.998546 | -3.73726   | -3.33859   | 2     |
| BC024139  | 7.681619 | 3.96018  | 4.621133 | 4.290656 | -3.72144   | -3.06049   | 2     |
|           | 11.11627 | 7.437932 | 7.53348  | 7.485706 | -3.67834   | -3.58279   | 2     |
| Olfr509   | 7.974192 | 4.298178 | 5.262799 | 4.780488 | -3.67601   | -2.71139   | 2     |
| 9230116L0 | 7.755088 | 4.08128  | 3.341761 | 3.71152  | -3.67381   | -4.41333   | 2     |
|           | 6.007148 | 2.337589 | 6.55934  | 4.448464 | -3.66956   | 0.552191   | 1     |
| Ranbp17   | 5.938013 | 2.337589 | 5.157947 | 3.747768 | -3.60042   | -0.78007   | 1     |
|           | 7.966042 | 4.417629 | 5.076932 | 4.74728  | -3.54841   | -2.88911   | 2     |
| Vmn2r1    | 5.861077 | 2.337589 | 4.253345 | 3.295467 | -3.52349   | -1.60773   | 1     |
| Gm5771    | 9.947033 | 6.446351 | 7.359866 | 6.903108 | -3.50068   | -2.58717   | 2     |
| Cbln4     | 8.946865 | 5.479268 | 6.22349  | 5.851379 | -3.4676    | -2.72338   | 2     |
| Olfr1122  | 7.515502 | 4.086074 | 4.945604 | 4.515839 | -3.42943   | -2.5699    | 2     |
| Gm5464    | 5.755631 | 2.337589 | 4.398449 | 3.368019 | -3.41804   | -1.35718   | 1     |
| Kalrn     | 8.046371 | 4.630534 | 4.317263 | 4.473898 | -3.41584   | -3.72911   | 2     |
| Dok6      | 6.707928 | 3.299782 | 4.404856 | 3.852319 | -3.40815   | -2.30307   | 2     |
| 4933401L0 | 7.384789 | 3.999574 | 5.50758  | 4.753577 | -3.38522   | -1.87721   | 1     |
| 4833419O1 | 6.095522 | 2.714741 | 5.794449 | 4.254595 | -3.38078   | -0.30107   | 1     |

|           |          |          |          |          |          |          |   |
|-----------|----------|----------|----------|----------|----------|----------|---|
|           | 5.705178 | 2.337589 | 5.931512 | 4.13455  | -3.36759 | 0.226334 | 1 |
|           | 7.971079 | 4.608207 | 4.197269 | 4.402738 | -3.36287 | -3.77381 | 2 |
| Ahnak     | 8.57457  | 5.212013 | 3.618456 | 4.415234 | -3.36256 | -4.95611 | 2 |
| Kctd4     | 8.764283 | 5.411555 | 5.567372 | 5.489464 | -3.35273 | -3.19691 | 2 |
| Asb11     | 10.41107 | 7.080375 | 8.473063 | 7.776719 | -3.3307  | -1.93801 | 1 |
| Vmn2r13   | 9.465137 | 6.138536 | 6.821298 | 6.479917 | -3.3266  | -2.64384 | 2 |
| Btn2a2    | 7.782556 | 4.456891 | 5.626451 | 5.041671 | -3.32567 | -2.15611 | 2 |
| Egr2      | 12.68664 | 9.362333 | 9.204158 | 9.283246 | -3.32431 | -3.48249 | 2 |
| Gm16432   | 7.686749 | 4.36837  | 4.813476 | 4.590923 | -3.31838 | -2.87327 | 2 |
| Nnt       | 8.479066 | 5.194477 | 5.216985 | 5.205731 | -3.28459 | -3.26208 | 2 |
| Egr4      | 14.51773 | 11.24759 | 11.85551 | 11.55155 | -3.27014 | -2.66223 | 2 |
| Sgtb      | 10.22113 | 6.957253 | 7.384789 | 7.171021 | -3.26387 | -2.83634 | 2 |
| 1700092K1 | 8.361106 | 5.119666 | 5.825208 | 5.472437 | -3.24144 | -2.5359  | 2 |
| Cacnb2    | 5.573839 | 2.337589 | 5.651296 | 3.994442 | -3.23625 | 0.077457 | 1 |
| Plekhn1   | 6.863626 | 3.658861 | 5.550602 | 4.604732 | -3.20476 | -1.31302 | 1 |
| Sgcd      | 7.792758 | 4.589004 | 3.951232 | 4.270118 | -3.20375 | -3.84153 | 2 |
| Dock10    | 8.366325 | 5.165097 | 5.527844 | 5.346471 | -3.20123 | -2.83848 | 2 |
| Rbm46os   | 7.557194 | 4.356671 | 5.705552 | 5.031112 | -3.20052 | -1.85164 | 1 |
| Adam12    | 5.531612 | 2.337589 | 4.878062 | 3.607825 | -3.19402 | -0.65355 | 1 |
| A430060F1 | 5.51251  | 2.337589 | 6.897166 | 4.617377 | -3.17492 | 1.384656 | 1 |
| Myh1      | 8.827611 | 5.659538 | 7.307878 | 6.483708 | -3.16807 | -1.51973 | 1 |
| Gm10334   | 10.89339 | 7.726145 | 8.634218 | 8.180182 | -3.16724 | -2.25917 | 2 |
|           | 6.468531 | 3.303468 | 3.969192 | 3.63633  | -3.16506 | -2.49934 | 2 |
|           | 6.563939 | 3.40022  | 4.144349 | 3.772284 | -3.16372 | -2.41959 | 2 |
| Olf78     | 9.385087 | 6.224379 | 6.24626  | 6.235319 | -3.16071 | -3.13883 | 2 |
|           | 7.175107 | 4.034265 | 4.430774 | 4.232519 | -3.14084 | -2.74433 | 2 |
| Myl4      | 14.46777 | 11.331   | 12.32156 | 11.82628 | -3.13678 | -2.14621 | 2 |
|           | 7.611939 | 4.478144 | 4.47831  | 4.478227 | -3.1338  | -3.13363 | 2 |
|           | 9.452726 | 6.324738 | 7.162434 | 6.743586 | -3.12799 | -2.29029 | 2 |
| Ptpn7     | 8.086794 | 4.964327 | 4.591067 | 4.777697 | -3.12247 | -3.49573 | 2 |
| C030013G  | 9.071536 | 5.969176 | 7.491195 | 6.730186 | -3.10236 | -1.58034 | 1 |
| Nr4a1     | 15.15407 | 12.05548 | 12.54666 | 12.30107 | -3.09859 | -2.60742 | 2 |
|           | 10.3694  | 7.290176 | 8.394519 | 7.842348 | -3.07922 | -1.97488 | 1 |
| Scn9a     | 6.921053 | 3.843311 | 6.975199 | 5.409255 | -3.07774 | 0.054146 | 1 |
|           | 7.082787 | 4.006262 | 4.638906 | 4.322584 | -3.07652 | -2.44388 | 2 |
|           | 7.520008 | 4.462921 | 5.530629 | 4.996775 | -3.05709 | -1.98938 | 1 |
|           | 8.125724 | 5.094955 | 4.611717 | 4.853336 | -3.03077 | -3.51401 | 2 |
| Slc17a3   | 5.360773 | 2.337589 | 4.381914 | 3.359751 | -3.02318 | -0.97886 | 1 |
| Ocm       | 9.765499 | 6.749796 | 7.26872  | 7.009258 | -3.0157  | -2.49678 | 2 |
| Olf33     | 6.876772 | 3.863817 | 5.365248 | 4.614532 | -3.01296 | -1.51152 | 1 |
| 1700091H1 | 6.461504 | 3.456044 | 4.877524 | 4.166784 | -3.00546 | -1.58398 | 1 |
| Nipbl     | 7.877714 | 4.881791 | 4.515113 | 4.698452 | -2.99592 | -3.3626  | 2 |
| Gm10372   | 8.34179  | 5.35144  | 5.709279 | 5.53036  | -2.99035 | -2.63251 | 2 |
| Spink3    | 6.880838 | 3.894973 | 5.677663 | 4.786318 | -2.98587 | -1.20318 | 1 |
| Arl4d     | 12.65009 | 9.682883 | 10.01499 | 9.848935 | -2.96721 | -2.63511 | 2 |
|           | 5.300859 | 2.337589 | 4.622007 | 3.479798 | -2.96327 | -0.67885 | 1 |
| A730090N  | 7.817491 | 4.857794 | 4.911197 | 4.884496 | -2.9597  | -2.90629 | 2 |

|           |          |          |          |          |          |          |   |
|-----------|----------|----------|----------|----------|----------|----------|---|
| Col24a1   | 9.838614 | 6.881814 | 7.321386 | 7.1016   | -2.9568  | -2.51723 | 2 |
| Hook3     | 8.871155 | 5.916326 | 8.328892 | 7.122609 | -2.95483 | -0.54226 | 1 |
|           | 7.4422   | 4.514454 | 4.216949 | 4.365702 | -2.92775 | -3.22525 | 2 |
| Krt25     | 7.325148 | 4.40058  | 2.322894 | 3.361737 | -2.92457 | -5.00225 | 2 |
| Hmga1     | 7.143911 | 4.225092 | 3.901435 | 4.063263 | -2.91882 | -3.24248 | 2 |
| Scube1    | 9.882284 | 6.964002 | 8.255209 | 7.609605 | -2.91828 | -1.62708 | 1 |
|           | 5.566536 | 2.648767 | 3.963432 | 3.306099 | -2.91777 | -1.6031  | 1 |
| AU015558  | 5.252174 | 2.337589 | 5.055149 | 3.696369 | -2.91459 | -0.19703 | 1 |
| Arc       | 15.73118 | 12.83977 | 13.11283 | 12.9763  | -2.89141 | -2.61835 | 2 |
| Abcb5     | 5.225365 | 2.337589 | 5.093551 | 3.71557  | -2.88778 | -0.13181 | 1 |
| Olfr448   | 8.304401 | 5.425909 | 5.812849 | 5.619379 | -2.87849 | -2.49155 | 2 |
|           | 6.944649 | 4.066498 | 3.928155 | 3.997327 | -2.87815 | -3.01649 | 2 |
|           | 10.42332 | 7.545698 | 8.458736 | 8.002217 | -2.87762 | -1.96459 | 1 |
| Gm14085   | 7.301259 | 4.433585 | 3.881177 | 4.157381 | -2.86767 | -3.42008 | 2 |
| Dpys      | 7.023612 | 4.16389  | 5.380977 | 4.772434 | -2.85972 | -1.64263 | 1 |
| Olfr683   | 5.195421 | 2.337589 | 4.164752 | 3.25117  | -2.85783 | -1.03067 | 1 |
| Klf17     | 12.28366 | 9.430914 | 10.44836 | 9.939637 | -2.85274 | -1.8353  | 1 |
| Cass4     | 5.186347 | 2.337589 | 4.405128 | 3.371358 | -2.84876 | -0.78122 | 1 |
| Ropn1     | 5.837631 | 2.989955 | 4.689085 | 3.83952  | -2.84768 | -1.14855 | 1 |
| Cntln     | 8.466564 | 5.620445 | 5.372275 | 5.49636  | -2.84612 | -3.09429 | 2 |
| Arr3      | 9.657125 | 6.819534 | 7.552699 | 7.186117 | -2.83759 | -2.10443 | 2 |
| Frrs1l    | 7.079001 | 4.25475  | 8.622512 | 6.438631 | -2.82425 | 1.543511 | 1 |
| Nr3c1     | 6.586201 | 3.766244 | 4.632864 | 4.199554 | -2.81996 | -1.95334 | 1 |
| Sost      | 8.153357 | 5.334334 | 5.490503 | 5.412419 | -2.81902 | -2.66285 | 2 |
| Lamp5     | 11.63978 | 8.822487 | 8.764283 | 8.793385 | -2.81729 | -2.8755  | 2 |
| Gm5524    | 6.30396  | 3.489303 | 4.706026 | 4.097664 | -2.81466 | -1.59793 | 1 |
|           | 10.18985 | 7.375888 | 7.707443 | 7.541665 | -2.81396 | -2.4824  | 2 |
| 4930406D1 | 5.151228 | 2.337589 | 4.672198 | 3.504893 | -2.81364 | -0.47903 | 1 |
|           | 5.144764 | 2.337589 | 5.36479  | 3.851189 | -2.80718 | 0.220025 | 1 |
| Spock1    | 10.7559  | 7.95048  | 8.336594 | 8.143537 | -2.80542 | -2.41931 | 2 |
| Ankrd34c  | 8.973342 | 6.168088 | 7.240657 | 6.704373 | -2.80525 | -1.73269 | 1 |
| Podxl     | 9.401587 | 6.600991 | 7.888833 | 7.244912 | -2.8006  | -1.51275 | 1 |
| Cacnb4    | 10.33397 | 7.534111 | 7.929313 | 7.731712 | -2.79986 | -2.40465 | 2 |
| Gm11497   | 6.038009 | 3.243481 | 4.488276 | 3.865879 | -2.79453 | -1.54973 | 1 |
| 2010107G1 | 5.123568 | 2.337589 | 4.6081   | 3.472844 | -2.78598 | -0.51547 | 1 |
|           | 12.45513 | 9.675628 | 10.7158  | 10.19571 | -2.7795  | -1.73933 | 1 |
|           | 5.110347 | 2.337589 | 4.801163 | 3.569376 | -2.77276 | -0.30918 | 1 |
| Vmn1r206  | 12.34752 | 9.591664 | 9.795649 | 9.693657 | -2.75586 | -2.55187 | 2 |
| H2-Q10    | 7.197557 | 4.442429 | 3.844737 | 4.143583 | -2.75513 | -3.35282 | 2 |
| Mcpt9     | 11.01121 | 8.265297 | 9.358577 | 8.811937 | -2.74591 | -1.65263 | 1 |
| Pld5      | 10.42728 | 7.686749 | 8.926182 | 8.306465 | -2.74053 | -1.50109 | 1 |
| Proser2   | 11.07721 | 8.337699 | 8.307755 | 8.322727 | -2.73951 | -2.76946 | 2 |
| Arl4d     | 12.42516 | 9.688652 | 9.894045 | 9.791349 | -2.73651 | -2.53111 | 2 |
| Kcnh5     | 10.12633 | 7.390026 | 7.955537 | 7.672782 | -2.7363  | -2.17079 | 2 |
|           | 7.703741 | 4.994054 | 5.702103 | 5.348078 | -2.70969 | -2.00164 | 2 |
| Lancl3    | 6.463857 | 3.756042 | 4.997551 | 4.376797 | -2.70781 | -1.46631 | 1 |
| Hmgcll1   | 12.70236 | 10.00032 | 10.47637 | 10.23834 | -2.70203 | -2.22599 | 2 |

|           |          |          |          |          |          |          |   |
|-----------|----------|----------|----------|----------|----------|----------|---|
| 4933415J0 | 7.827212 | 5.130978 | 4.774622 | 4.9528   | -2.69623 | -3.05259 | 2 |
| Gpr133    | 7.208438 | 4.517931 | 6.677987 | 5.597959 | -2.69051 | -0.53045 | 1 |
|           | 8.808365 | 6.124711 | 5.225264 | 5.674987 | -2.68365 | -3.5831  | 2 |
| Vmn2r75   | 7.069259 | 4.396949 | 4.196579 | 4.296764 | -2.67231 | -2.87268 | 2 |
| Kcnf1     | 7.160228 | 4.488276 | 4.712311 | 4.600294 | -2.67195 | -2.44792 | 2 |
| Olfr859   | 5.80676  | 3.135082 | 3.812498 | 3.47379  | -2.67168 | -1.99426 | 1 |
| Egr1      | 15.39053 | 12.72487 | 13.42973 | 13.0773  | -2.66566 | -1.9608  | 1 |
| Clca6     | 8.191411 | 5.529678 | 5.558696 | 5.544187 | -2.66173 | -2.63271 | 2 |
|           | 12.21238 | 9.558115 | 10.53715 | 10.04763 | -2.65427 | -1.67523 | 1 |
| Wee2      | 4.989603 | 2.337589 | 7.993508 | 5.165548 | -2.65201 | 3.003905 | 1 |
| Asb11     | 10.72054 | 8.069246 | 8.936535 | 8.502891 | -2.6513  | -1.78401 | 1 |
| Tmlhe     | 10.19593 | 7.545363 | 7.670713 | 7.608038 | -2.65057 | -2.52522 | 2 |
| Ssty1     | 6.752191 | 4.10512  | 3.950066 | 4.027593 | -2.64707 | -2.80213 | 2 |
| Rtfdc1    | 7.421699 | 4.777475 | 3.226255 | 4.001865 | -2.64422 | -4.19544 | 2 |
|           | 6.825636 | 4.183731 | 2.322894 | 3.253312 | -2.64191 | -4.50274 | 2 |
| Coch      | 11.88707 | 9.253165 | 10.74283 | 9.997996 | -2.6339  | -1.14424 | 1 |
| Ankrd45   | 12.51827 | 9.888916 | 10.73092 | 10.30992 | -2.62936 | -1.78735 | 1 |
|           | 5.150371 | 2.524104 | 4.774252 | 3.649178 | -2.62627 | -0.37612 | 1 |
| Scn4b     | 12.74069 | 10.11967 | 10.50512 | 10.31239 | -2.62102 | -2.23557 | 2 |
| Cap2      | 11.44848 | 8.829868 | 9.673636 | 9.251752 | -2.61861 | -1.77484 | 1 |
| Fbln5     | 6.374549 | 3.761556 | 4.37038  | 4.065968 | -2.61299 | -2.00417 | 2 |
| Myh2      | 10.35913 | 7.749316 | 8.915898 | 8.332607 | -2.60982 | -1.44324 | 1 |
|           | 5.328369 | 2.733132 | 5.770681 | 4.251907 | -2.59524 | 0.442312 | 1 |
| Krt12     | 13.39821 | 10.80299 | 11.70006 | 11.25152 | -2.59523 | -1.69815 | 1 |
| Mfsd4     | 11.59556 | 9.001981 | 9.946551 | 9.474266 | -2.59358 | -1.64901 | 1 |
| Spred3    | 7.576147 | 4.982914 | 5.259709 | 5.121312 | -2.59323 | -2.31644 | 2 |
| Nxf7      | 9.47754  | 6.888399 | 7.814478 | 7.351439 | -2.58914 | -1.66306 | 1 |
| Prss55    | 7.418179 | 4.834072 | 5.301152 | 5.067612 | -2.58411 | -2.11703 | 2 |
|           | 4.918965 | 2.337589 | 4.073444 | 3.205516 | -2.58138 | -0.84552 | 1 |
|           | 10.09776 | 7.519255 | 8.142221 | 7.830738 | -2.57851 | -1.95554 | 1 |
| A730017C2 | 5.536984 | 2.962279 | 4.808017 | 3.885148 | -2.57471 | -0.72897 | 1 |
| Tcap      | 10.36136 | 7.786868 | 7.361661 | 7.574265 | -2.57449 | -2.9997  | 2 |
| Dusp1     | 13.52209 | 10.94929 | 11.24399 | 11.09664 | -2.57281 | -2.2781  | 2 |
| Gm4081    | 6.970571 | 4.410575 | 4.601518 | 4.506046 | -2.56    | -2.36905 | 2 |
| Slc23a3   | 10.44953 | 7.889857 | 7.865989 | 7.877923 | -2.55967 | -2.58354 | 2 |
| Strbp     | 7.651241 | 5.096728 | 4.685854 | 4.891291 | -2.55451 | -2.96539 | 2 |
| Rgs4      | 11.31772 | 8.764794 | 9.67586  | 9.220327 | -2.55292 | -1.64186 | 1 |
| Pcgf2     | 7.244004 | 4.692226 | 3.833078 | 4.262652 | -2.55178 | -3.41093 | 2 |
| Xpo7      | 7.954231 | 5.405627 | 5.572437 | 5.489032 | -2.5486  | -2.38179 | 2 |
| Ccbe1     | 6.967214 | 4.424029 | 4.135634 | 4.279832 | -2.54318 | -2.83158 | 2 |
|           | 6.834623 | 4.29443  | 2.322894 | 3.308662 | -2.54019 | -4.51173 | 2 |
|           | 7.793445 | 5.254155 | 6.260028 | 5.757092 | -2.53929 | -1.53342 | 1 |
|           | 11.92011 | 9.380896 | 10.21942 | 9.800156 | -2.53921 | -1.70069 | 1 |
| 4930429B2 | 10.419   | 7.880009 | 9.171001 | 8.525505 | -2.539   | -1.248   | 1 |
| Tspan11   | 7.721417 | 5.184062 | 5.311269 | 5.247665 | -2.53736 | -2.41015 | 2 |
| Tet3      | 7.398705 | 4.865892 | 7.240211 | 6.053051 | -2.53281 | -0.15849 | 1 |
| Olfr640   | 4.870223 | 2.337589 | 4.641829 | 3.489709 | -2.53263 | -0.22839 | 1 |



|           |          |          |          |          |          |          |   |
|-----------|----------|----------|----------|----------|----------|----------|---|
| Pik3c2g   | 12.95522 | 10.42678 | 11.10818 | 10.76748 | -2.52844 | -1.84704 | 1 |
|           | 4.861451 | 2.337589 | 4.70616  | 3.521874 | -2.52386 | -0.15529 | 1 |
| Gm12371   | 11.0745  | 8.551103 | 8.790955 | 8.671029 | -2.52339 | -2.28354 | 2 |
| Hkdc1     | 12.47999 | 9.961831 | 11.0705  | 10.51616 | -2.51816 | -1.40949 | 1 |
| Exoc3l    | 4.852862 | 2.337589 | 4.142933 | 3.240261 | -2.51527 | -0.70993 | 1 |
|           | 8.519517 | 6.004303 | 5.868039 | 5.936171 | -2.51521 | -2.65148 | 2 |
| Tmc1      | 6.714059 | 4.199486 | 4.729954 | 4.46472  | -2.51457 | -1.9841  | 1 |
| Cpne9     | 13.20183 | 10.69039 | 11.55088 | 11.12063 | -2.51144 | -1.65095 | 1 |
|           | 7.562398 | 5.065725 | 4.950739 | 5.008232 | -2.49667 | -2.61166 | 2 |
| Kcnv1     | 13.00691 | 10.51597 | 11.92828 | 11.22213 | -2.49094 | -1.07863 | 1 |
| Cadps2    | 6.843552 | 4.357901 | 5.253397 | 4.805649 | -2.48565 | -1.59016 | 1 |
| Gbp8      | 8.263356 | 5.7854   | 6.534898 | 6.160149 | -2.47796 | -1.72846 | 1 |
| Cited2    | 10.97517 | 8.497457 | 8.855036 | 8.676247 | -2.47771 | -2.12013 | 2 |
| Zfp264    | 6.972545 | 4.497228 | 6.405628 | 5.451428 | -2.47532 | -0.56692 | 1 |
| 5330411J1 | 4.809815 | 2.337589 | 4.613918 | 3.475753 | -2.47223 | -0.1959  | 1 |
| Rbfox3    | 11.49643 | 9.025139 | 9.393981 | 9.20956  | -2.47129 | -2.10245 | 2 |
| 4933439N1 | 9.581355 | 7.112585 | 7.962952 | 7.537768 | -2.46877 | -1.6184  | 1 |
| Fam151b   | 7.135352 | 4.666988 | 5.421029 | 5.044008 | -2.46836 | -1.71432 | 1 |
| 1500035N2 | 9.717183 | 7.25133  | 7.504556 | 7.377943 | -2.46585 | -2.21263 | 2 |
| Kcnq5     | 11.5736  | 9.109338 | 9.164155 | 9.136747 | -2.46426 | -2.40944 | 2 |
|           | 4.801587 | 2.337589 | 6.144433 | 4.241011 | -2.464   | 1.342846 | 1 |
|           | 7.524588 | 5.060773 | 5.352385 | 5.206579 | -2.46382 | -2.1722  | 2 |
| Elavl4    | 6.574003 | 4.113834 | 4.929547 | 4.521691 | -2.46017 | -1.64446 | 1 |
| Wdtdc1    | 11.74033 | 9.283353 | 9.994813 | 9.639083 | -2.45697 | -1.74551 | 1 |
| Rspo1     | 13.25199 | 10.79783 | 11.31071 | 11.05427 | -2.45415 | -1.94128 | 1 |
| Satb2     | 9.424171 | 6.972138 | 6.749615 | 6.860877 | -2.45203 | -2.67456 | 2 |
| Nhsl2     | 10.22965 | 7.779717 | 8.499687 | 8.139702 | -2.44993 | -1.72996 | 1 |
| Slc10a2   | 4.774901 | 2.337589 | 5.398654 | 3.868121 | -2.43731 | 0.623753 | 1 |
| Gpr137c   | 7.140966 | 4.715224 | 4.628482 | 4.671853 | -2.42574 | -2.51248 | 2 |
| Gabre     | 13.04931 | 10.63412 | 11.4544  | 11.04426 | -2.41519 | -1.59491 | 1 |
| Olfir545  | 8.179853 | 5.769723 | 6.05186  | 5.910792 | -2.41013 | -2.12799 | 2 |
| Sowahb    | 7.458251 | 5.05975  | 5.208363 | 5.134056 | -2.3985  | -2.24989 | 2 |
| LOC100048 | 8.117058 | 5.723064 | 5.595733 | 5.659398 | -2.39399 | -2.52133 | 2 |
| Fbln1     | 8.441767 | 6.049267 | 5.891062 | 5.970165 | -2.3925  | -2.55071 | 2 |
| Pcsk1     | 9.769536 | 7.377888 | 8.510832 | 7.94436  | -2.39165 | -1.2587  | 1 |
| Dkk1      | 14.3653  | 11.97556 | 12.49444 | 12.235   | -2.38974 | -1.87087 | 1 |
| Slc17a8   | 10.41043 | 8.021011 | 8.895072 | 8.458042 | -2.38942 | -1.51536 | 1 |
|           | 8.735394 | 6.346428 | 5.684929 | 6.015679 | -2.38897 | -3.05046 | 2 |
| Slc39a9   | 6.116399 | 3.739418 | 4.155128 | 3.947273 | -2.37698 | -1.96127 | 1 |
| Glp2r     | 8.056112 | 5.67931  | 6.561566 | 6.120438 | -2.3768  | -1.49455 | 1 |
| Gpr112    | 6.680188 | 4.303389 | 5.545034 | 4.924212 | -2.3768  | -1.13515 | 1 |
| Ccl27a    | 10.54121 | 8.165287 | 8.138263 | 8.151775 | -2.37592 | -2.40294 | 2 |
| Sdcbp     | 7.625469 | 5.251223 | 2.997272 | 4.124247 | -2.37425 | -4.6282  | 2 |
| Ppm1l     | 11.03528 | 8.661948 | 9.156313 | 8.909131 | -2.37333 | -1.87897 | 1 |
| 1700080N1 | 6.5958   | 4.223815 | 5.523125 | 4.87347  | -2.37199 | -1.07268 | 1 |
| Cyp4a31   | 13.16553 | 10.79483 | 11.65549 | 11.22516 | -2.3707  | -1.51004 | 1 |
| Sp140     | 8.467968 | 6.099905 | 6.381924 | 6.240914 | -2.36806 | -2.08604 | 2 |

|           |          |          |          |          |          |          |   |
|-----------|----------|----------|----------|----------|----------|----------|---|
| Proser2   | 9.340793 | 6.975199 | 7.111377 | 7.043288 | -2.36559 | -2.22942 | 2 |
| Fst       | 9.335012 | 6.970309 | 8.363075 | 7.666692 | -2.3647  | -0.97194 | 1 |
| Eqtn      | 12.31422 | 9.949564 | 10.80854 | 10.37905 | -2.36466 | -1.50569 | 1 |
| Tyms      | 13.77778 | 11.41571 | 12.2114  | 11.81356 | -2.36206 | -1.56638 | 1 |
| Aqp6      | 8.771694 | 6.411061 | 9.301436 | 7.856249 | -2.36063 | 0.529742 | 1 |
| Cartpt    | 11.07536 | 8.714945 | 8.312002 | 8.513474 | -2.36041 | -2.76336 | 2 |
| Tex40     | 13.28229 | 10.92198 | 11.21585 | 11.06892 | -2.36031 | -2.06644 | 2 |
| 4933402J0 | 4.693312 | 2.337589 | 4.870681 | 3.604135 | -2.35572 | 0.177369 | 1 |
| Olfr985   | 7.154147 | 4.79843  | 4.127788 | 4.463109 | -2.35572 | -3.02636 | 2 |
|           | 11.31111 | 8.959236 | 8.35773  | 8.658483 | -2.35188 | -2.95338 | 2 |
| C730029AC | 8.210816 | 5.862878 | 4.917359 | 5.390119 | -2.34794 | -3.29346 | 2 |
| Gabra2    | 6.621182 | 4.273403 | 4.428964 | 4.351183 | -2.34778 | -2.19222 | 2 |
|           | 10.97508 | 8.629077 | 9.795017 | 9.212047 | -2.346   | -1.18006 | 1 |
| Slitrk4   | 11.33831 | 9.000301 | 9.281221 | 9.140761 | -2.33801 | -2.05709 | 2 |
| Rgs4      | 16.08802 | 13.7512  | 15.00002 | 14.37561 | -2.33682 | -1.08799 | 1 |
| Gm5665    | 7.510901 | 5.180471 | 5.374541 | 5.277506 | -2.33043 | -2.13636 | 2 |
|           | 10.99217 | 8.663505 | 9.389369 | 9.026437 | -2.32866 | -1.6028  | 1 |
| Mpl       | 8.844142 | 6.51817  | 6.949285 | 6.733728 | -2.32597 | -1.89486 | 1 |
| Arhgap15  | 12.735   | 10.40978 | 11.66739 | 11.03858 | -2.32523 | -1.06761 | 1 |
| Zswim4    | 7.7977   | 5.474662 | 5.249476 | 5.362069 | -2.32304 | -2.54822 | 2 |
| Gm3510    | 12.00941 | 9.691345 | 9.842994 | 9.76717  | -2.31807 | -2.16642 | 2 |
|           | 10.7533  | 8.435509 | 9.182339 | 8.808924 | -2.3178  | -1.57097 | 1 |
| Coro2a    | 8.018199 | 5.70065  | 5.529087 | 5.614868 | -2.31755 | -2.48911 | 2 |
| Zdhhc8    | 13.26081 | 10.94987 | 11.26248 | 11.10618 | -2.31094 | -1.99833 | 1 |
|           | 11.87632 | 9.570522 | 10.40811 | 9.989317 | -2.3058  | -1.46821 | 1 |
| 1700013M  | 4.643173 | 2.337589 | 3.895978 | 3.116783 | -2.30558 | -0.7472  | 1 |
| Hr        | 13.38596 | 11.08077 | 11.61708 | 11.34893 | -2.30519 | -1.76887 | 1 |
| Lrrtm4    | 5.503489 | 3.202214 | 4.904792 | 4.053503 | -2.30128 | -0.5987  | 1 |
| Ren1      | 11.94641 | 9.645968 | 10.43182 | 10.03889 | -2.30044 | -1.51459 | 1 |
| Gabrg2    | 7.784126 | 5.484019 | 5.078012 | 5.281015 | -2.30011 | -2.70611 | 2 |
| Vmn2r85   | 9.328056 | 7.029669 | 8.202211 | 7.61594  | -2.29839 | -1.12585 | 1 |
| Zmym2     | 4.979324 | 2.68187  | 6.054579 | 4.368224 | -2.29745 | 1.075255 | 1 |
| Cyp2j5    | 4.625278 | 2.337589 | 6.247639 | 4.292614 | -2.28769 | 1.622361 | 1 |
|           | 5.931274 | 3.644483 | 5.829818 | 4.73715  | -2.28679 | -0.10146 | 1 |
| Ndst1     | 8.073396 | 5.788987 | 5.162063 | 5.475525 | -2.28441 | -2.91133 | 2 |
| Olfr279   | 9.448273 | 7.164534 | 6.954166 | 7.05935  | -2.28374 | -2.49411 | 2 |
| Gm2795    | 7.808352 | 5.531612 | 7.303828 | 6.41772  | -2.27674 | -0.50452 | 1 |
|           | 13.76666 | 11.49064 | 12.21672 | 11.85368 | -2.27602 | -1.54994 | 1 |
| Nkx3-1    | 9.21802  | 6.942346 | 7.560062 | 7.251204 | -2.27567 | -1.65796 | 1 |
| Sema3a    | 12.15178 | 9.876666 | 10.5225  | 10.19958 | -2.27512 | -1.62929 | 1 |
| Nanos1    | 13.28326 | 11.00859 | 11.3431  | 11.17584 | -2.27467 | -1.94017 | 1 |
| 4930592AC | 8.200911 | 5.927026 | 5.923809 | 5.925417 | -2.27388 | -2.2771  | 2 |
| Al451458  | 8.701223 | 6.428686 | 6.775892 | 6.602289 | -2.27254 | -1.92533 | 1 |
| Mup17     | 7.859285 | 5.587018 | 4.898385 | 5.242701 | -2.27227 | -2.9609  | 2 |
| Cyp4a10   | 12.93424 | 10.66446 | 11.42535 | 11.0449  | -2.26979 | -1.50889 | 1 |
| Npy       | 13.92427 | 11.65549 | 13.23515 | 12.44532 | -2.26878 | -0.68912 | 1 |
|           | 7.957505 | 5.691872 | 5.638924 | 5.665398 | -2.26563 | -2.31858 | 2 |

|           |          |          |          |          |          |          |   |
|-----------|----------|----------|----------|----------|----------|----------|---|
| Cngb3     | 8.479496 | 6.217856 | 7.309847 | 6.763851 | -2.26164 | -1.16965 | 1 |
| Olf121    | 6.217574 | 3.958502 | 5.690591 | 4.824546 | -2.25907 | -0.52698 | 1 |
| Abi3bp    | 9.265922 | 7.010419 | 6.82704  | 6.91873  | -2.2555  | -2.43888 | 2 |
| Elavl2    | 11.8629  | 9.609819 | 10.78496 | 10.19739 | -2.25308 | -1.07794 | 1 |
| Wnt9a     | 12.95462 | 10.70191 | 10.91394 | 10.80792 | -2.25271 | -2.04068 | 2 |
| Klra5     | 9.663637 | 7.412207 | 8.039906 | 7.726057 | -2.25143 | -1.62373 | 1 |
|           | 11.22453 | 8.974538 | 9.766873 | 9.370706 | -2.24999 | -1.45766 | 1 |
|           | 9.999268 | 7.750658 | 8.303549 | 8.027103 | -2.24861 | -1.69572 | 1 |
| C2cd4d    | 7.205424 | 4.96102  | 4.692002 | 4.826511 | -2.2444  | -2.51342 | 2 |
| Defa23    | 7.25593  | 5.012165 | 4.926402 | 4.969283 | -2.24376 | -2.32953 | 2 |
| Arl9      | 12.07728 | 9.834491 | 10.55301 | 10.19375 | -2.24279 | -1.52426 | 1 |
| Cadps2    | 12.45959 | 10.21854 | 11.05802 | 10.63828 | -2.24105 | -1.40157 | 1 |
|           | 7.526572 | 5.287962 | 5.53717  | 5.412566 | -2.23861 | -1.9894  | 1 |
| Zc3h12c   | 11.92162 | 9.68579  | 10.81479 | 10.25029 | -2.23583 | -1.10683 | 1 |
| Gata4     | 9.72006  | 7.486027 | 8.080417 | 7.783222 | -2.23403 | -1.63964 | 1 |
|           | 6.444178 | 4.21074  | 5.647459 | 4.929099 | -2.23344 | -0.79672 | 1 |
| Lpp       | 7.883006 | 5.651296 | 5.871679 | 5.761488 | -2.23171 | -2.01133 | 2 |
| Rad51ap2  | 9.734106 | 7.504556 | 8.271352 | 7.887954 | -2.22955 | -1.46275 | 1 |
| Gm10426   | 6.869714 | 4.641829 | 6.453794 | 5.547811 | -2.22789 | -0.41592 | 1 |
| Slc51b    | 7.227979 | 5.005344 | 4.851383 | 4.928364 | -2.22263 | -2.3766  | 2 |
| Mtus2     | 7.75908  | 5.537278 | 5.413125 | 5.475201 | -2.2218  | -2.34596 | 2 |
| Tbc1d30   | 12.58279 | 10.36404 | 10.8084  | 10.58622 | -2.21875 | -1.77439 | 1 |
| 1500016L0 | 10.2172  | 8.002027 | 8.920281 | 8.461154 | -2.21517 | -1.29692 | 1 |
| Xylt2     | 12.78699 | 10.57704 | 11.20087 | 10.88896 | -2.20994 | -1.58611 | 1 |
|           | 6.946402 | 4.737051 | 4.932034 | 4.834543 | -2.20935 | -2.01437 | 2 |
| Pthlh     | 9.863516 | 7.657348 | 8.577024 | 8.117186 | -2.20617 | -1.28649 | 1 |
| AU040320  | 8.012518 | 5.806383 | 6.586201 | 6.196292 | -2.20614 | -1.42632 | 1 |
| Pdp1      | 15.25343 | 13.04754 | 13.85515 | 13.45134 | -2.2059  | -1.39829 | 1 |
| Hcrtr1    | 8.426184 | 6.221263 | 7.335961 | 6.778612 | -2.20492 | -1.09022 | 1 |
|           | 5.930904 | 3.72854  | 4.167881 | 3.948211 | -2.20236 | -1.76302 | 1 |
| Col4a6    | 13.02639 | 10.82414 | 11.20895 | 11.01655 | -2.20225 | -1.81744 | 1 |
| Ap2m1     | 7.102051 | 4.900962 | 5.566536 | 5.233749 | -2.20109 | -1.53552 | 1 |
| AI835735  | 7.271715 | 5.071159 | 4.669218 | 4.870188 | -2.20056 | -2.6025  | 2 |
| Fam132b   | 6.961409 | 4.761433 | 4.280088 | 4.520761 | -2.19998 | -2.68132 | 2 |
|           | 12.60694 | 10.40954 | 11.10757 | 10.75856 | -2.1974  | -1.49936 | 1 |
|           | 7.542317 | 5.34761  | 5.657479 | 5.502544 | -2.19471 | -1.88484 | 1 |
| Neu2      | 11.93496 | 9.740515 | 10.09793 | 9.919223 | -2.19445 | -1.83703 | 1 |
| Cldn22    | 9.410463 | 7.222799 | 8.571675 | 7.897237 | -2.18766 | -0.83879 | 1 |
| LOC101056 | 13.53907 | 11.35375 | 11.9458  | 11.64977 | -2.18532 | -1.59327 | 1 |
| Slc7a14   | 7.146598 | 4.963625 | 4.992999 | 4.978312 | -2.18297 | -2.1536  | 2 |
| Wdr13     | 7.222981 | 5.040397 | 5.030349 | 5.035373 | -2.18258 | -2.19263 | 2 |
| Txlng     | 13.27778 | 11.09587 | 11.90205 | 11.49896 | -2.18191 | -1.37573 | 1 |
|           | 6.564652 | 4.384159 | 4.377986 | 4.381073 | -2.18049 | -2.18667 | 2 |
| Grip1     | 13.95116 | 11.77249 | 12.56255 | 12.16752 | -2.17867 | -1.38861 | 1 |
| Defb23    | 5.420694 | 3.24224  | 4.254227 | 3.748234 | -2.17845 | -1.16647 | 1 |
| Skint3    | 6.792825 | 4.614862 | 4.941303 | 4.778083 | -2.17796 | -1.85152 | 1 |
| Gm17501   | 9.324876 | 7.148088 | 7.842098 | 7.495093 | -2.17679 | -1.48278 | 1 |

|           |          |          |          |          |          |          |   |
|-----------|----------|----------|----------|----------|----------|----------|---|
| 1700041C2 | 5.011627 | 2.835643 | 4.441298 | 3.63847  | -2.17598 | -0.57033 | 1 |
| Cyp2e1    | 7.489056 | 5.314498 | 6.156738 | 5.735618 | -2.17456 | -1.33232 | 1 |
| Ang3      | 13.21741 | 11.04298 | 11.78209 | 11.41254 | -2.17443 | -1.43532 | 1 |
| Hes3      | 8.33209  | 6.160218 | 6.692292 | 6.426255 | -2.17187 | -1.6398  | 1 |
| Vmn2r121  | 10.40802 | 8.236182 | 9.526073 | 8.881128 | -2.17183 | -0.88194 | 1 |
| Obox6     | 5.239833 | 3.068067 | 5.379298 | 4.223683 | -2.17177 | 0.139465 | 1 |
| Prss16    | 7.300197 | 5.128439 | 5.979077 | 5.553758 | -2.17176 | -1.32112 | 1 |
|           | 7.877189 | 5.709962 | 6.028095 | 5.869029 | -2.16723 | -1.84909 | 1 |
| Kiss1     | 9.190905 | 7.024215 | 6.644146 | 6.83418  | -2.16669 | -2.54676 | 2 |
| Hcrtr1    | 8.100164 | 5.939971 | 7.171852 | 6.555911 | -2.16019 | -0.92831 | 1 |
| Krtap10-4 | 10.63566 | 8.476313 | 9.279188 | 8.877751 | -2.15935 | -1.35647 | 1 |
| Map3k13   | 12.78298 | 10.62411 | 11.37129 | 10.9977  | -2.15887 | -1.41169 | 1 |
| Vip       | 11.55837 | 9.402103 | 10.43504 | 9.918571 | -2.15626 | -1.12333 | 1 |
| Vmn2r12   | 8.187261 | 6.031768 | 6.86479  | 6.448279 | -2.15549 | -1.32247 | 1 |
|           | 10.61649 | 8.461176 | 9.265503 | 8.86334  | -2.15531 | -1.35099 | 1 |
| Tmem132c  | 10.71333 | 8.558159 | 9.360147 | 8.959153 | -2.15517 | -1.35318 | 1 |
| Milr1     | 14.46989 | 12.31937 | 12.76874 | 12.54405 | -2.15052 | -1.70115 | 1 |
| Smco2     | 8.21646  | 6.068914 | 6.411673 | 6.240294 | -2.14755 | -1.80479 | 1 |
| Allc      | 8.44066  | 6.295027 | 6.922706 | 6.608867 | -2.14563 | -1.51795 | 1 |
| Fzd4      | 10.76595 | 8.620749 | 8.999381 | 8.810065 | -2.1452  | -1.76657 | 1 |
|           | 9.128155 | 6.984565 | 7.774114 | 7.379339 | -2.14359 | -1.35404 | 1 |
| Apol10a   | 7.437523 | 5.296941 | 5.570017 | 5.433479 | -2.14058 | -1.86751 | 1 |
|           | 8.666927 | 6.530154 | 7.721878 | 7.126016 | -2.13677 | -0.94505 | 1 |
| Pnma5     | 5.583393 | 3.44702  | 4.250754 | 3.848887 | -2.13637 | -1.33264 | 1 |
| Kcnc2     | 13.07455 | 10.93854 | 11.64967 | 11.29411 | -2.13601 | -1.42488 | 1 |
| Map3k5    | 6.697448 | 4.561704 | 4.142443 | 4.352073 | -2.13574 | -2.55501 | 2 |
|           | 8.968781 | 6.833454 | 7.148088 | 6.990771 | -2.13533 | -1.82069 | 1 |
|           | 7.449226 | 5.314695 | 5.109729 | 5.212212 | -2.13453 | -2.3395  | 2 |
| Gria2     | 9.995332 | 7.861264 | 7.849451 | 7.855357 | -2.13407 | -2.14588 | 2 |
| Gm20878   | 11.69297 | 9.559731 | 10.01992 | 9.789828 | -2.13324 | -1.67304 | 1 |
| Sftpb     | 5.661809 | 3.528686 | 5.579057 | 4.553871 | -2.13312 | -0.08275 | 1 |
|           | 12.5763  | 10.44451 | 10.60526 | 10.52488 | -2.13179 | -1.97104 | 1 |
|           | 7.670888 | 5.539733 | 5.886508 | 5.71312  | -2.13116 | -1.78438 | 1 |
| Krt75     | 7.413435 | 5.285222 | 6.235726 | 5.760474 | -2.12821 | -1.17771 | 1 |
| Mlip      | 10.07309 | 7.950803 | 8.542901 | 8.246852 | -2.12229 | -1.53019 | 1 |
|           | 5.053174 | 2.931714 | 5.330245 | 4.13098  | -2.12146 | 0.277072 | 1 |
| Slamf1    | 7.209875 | 5.089121 | 5.175265 | 5.132193 | -2.12075 | -2.03461 | 2 |
| Gm20878   | 10.16833 | 8.050613 | 7.936862 | 7.993737 | -2.11772 | -2.23147 | 2 |
|           | 10.73884 | 8.621922 | 9.657863 | 9.139893 | -2.11691 | -1.08097 | 1 |
| Colq      | 8.323053 | 6.207859 | 6.75951  | 6.483684 | -2.11519 | -1.56354 | 1 |
|           | 10.89668 | 8.785756 | 9.09804  | 8.941898 | -2.11092 | -1.79864 | 1 |
| Klra16    | 11.81207 | 9.702466 | 10.51876 | 10.11061 | -2.1096  | -1.29331 | 1 |
| Ttc9b     | 12.75799 | 10.65354 | 9.938324 | 10.29593 | -2.10445 | -2.81966 | 2 |
| 41708     | 7.061468 | 4.957274 | 5.813733 | 5.385503 | -2.10419 | -1.24774 | 1 |
| Sgcg      | 8.50009  | 6.396514 | 7.19041  | 6.793462 | -2.10358 | -1.30968 | 1 |
| Dlx6os1   | 7.385538 | 5.282779 | 6.49309  | 5.887934 | -2.10276 | -0.89245 | 1 |
| Med18     | 12.62583 | 10.52403 | 11.20315 | 10.86359 | -2.1018  | -1.42268 | 1 |

|           |          |          |          |          |          |          |   |
|-----------|----------|----------|----------|----------|----------|----------|---|
| 493059702 | 12.02615 | 9.928094 | 10.51247 | 10.22028 | -2.09806 | -1.51368 | 1 |
| Cadps2    | 10.64453 | 8.551663 | 9.33686  | 8.944262 | -2.09287 | -1.30767 | 1 |
| Hrg       | 12.60883 | 10.5169  | 11.20276 | 10.85983 | -2.09194 | -1.40607 | 1 |
|           | 8.847912 | 6.758912 | 6.299727 | 6.52932  | -2.089   | -2.54818 | 2 |
| Nrxn3     | 6.94002  | 4.851383 | 5.649358 | 5.25037  | -2.08864 | -1.29066 | 1 |
| Mettl7a3  | 14.04999 | 11.96277 | 12.79734 | 12.38006 | -2.08722 | -1.25265 | 1 |
|           | 7.122795 | 5.036057 | 2.486948 | 3.761502 | -2.08674 | -4.63585 | 2 |
| 492151701 | 6.437617 | 4.351392 | 4.38694  | 4.369166 | -2.08623 | -2.05068 | 2 |
| Nkain2    | 5.438345 | 3.353275 | 4.44458  | 3.898927 | -2.08507 | -0.99377 | 1 |
|           | 8.267638 | 6.185337 | 6.253148 | 6.219242 | -2.0823  | -2.01449 | 2 |
| Fmo5      | 8.855851 | 6.774093 | 7.460846 | 7.11747  | -2.08176 | -1.395   | 1 |
| Vmn2r11   | 8.053645 | 5.974626 | 6.517562 | 6.246094 | -2.07902 | -1.53608 | 1 |
| 1700086L1 | 5.008888 | 2.934399 | 4.684552 | 3.809475 | -2.07449 | -0.32434 | 1 |
| Olfr341   | 7.022336 | 4.955053 | 3.72854  | 4.341797 | -2.06728 | -3.2938  | 2 |
| Zfp605    | 5.655324 | 3.588254 | 5.517563 | 4.552909 | -2.06707 | -0.13776 | 1 |
| Arhgap20  | 11.43811 | 9.373561 | 9.456784 | 9.415173 | -2.06455 | -1.98132 | 1 |
| Cadm2     | 11.39138 | 9.327166 | 10.03196 | 9.679563 | -2.06421 | -1.35942 | 1 |
| 3110047P2 | 10.01054 | 7.946724 | 8.719548 | 8.333136 | -2.06382 | -1.29099 | 1 |
| D3Bwg056  | 9.281962 | 7.219531 | 8.077701 | 7.648616 | -2.06243 | -1.20426 | 1 |
| Gm1661    | 8.569215 | 6.506815 | 7.118424 | 6.81262  | -2.0624  | -1.45079 | 1 |
| Kcnt2     | 5.959412 | 3.900822 | 4.710457 | 4.30564  | -2.05859 | -1.24895 | 1 |
| 1700003M  | 7.907022 | 5.849243 | 6.11531  | 5.982276 | -2.05778 | -1.79171 | 1 |
| Grk4      | 14.07684 | 12.02059 | 12.80907 | 12.41483 | -2.05625 | -1.26777 | 1 |
|           | 9.368791 | 7.31363  | 8.097189 | 7.70541  | -2.05516 | -1.2716  | 1 |
|           | 9.642916 | 7.58853  | 8.191626 | 7.890078 | -2.05439 | -1.45129 | 1 |
| Olfr738   | 12.1213  | 10.067   | 11.01748 | 10.54224 | -2.0543  | -1.10382 | 1 |
| Ext2      | 9.005414 | 6.953022 | 7.472713 | 7.212867 | -2.05239 | -1.5327  | 1 |
| Lingo1    | 10.92544 | 8.873145 | 9.322558 | 9.097852 | -2.0523  | -1.60289 | 1 |
| Masp1     | 12.3012  | 10.24935 | 10.57114 | 10.41025 | -2.05185 | -1.73006 | 1 |
| Map1b     | 14.5322  | 12.48104 | 13.201   | 12.84102 | -2.05116 | -1.3312  | 1 |
|           | 7.508283 | 5.457842 | 5.457479 | 5.457661 | -2.05044 | -2.0508  | 2 |
| Stxbp5l   | 5.749124 | 3.699842 | 3.97502  | 3.837431 | -2.04928 | -1.7741  | 1 |
| A630038E1 | 4.92209  | 2.87427  | 4.435981 | 3.655126 | -2.04782 | -0.48611 | 1 |
| Olfr912   | 4.685308 | 2.637751 | 4.262769 | 3.45026  | -2.04756 | -0.42254 | 1 |
| Vmn2r61   | 8.899204 | 6.853196 | 7.585595 | 7.219395 | -2.04601 | -1.31361 | 1 |
| Il12a     | 7.39117  | 5.346578 | 6.746006 | 6.046292 | -2.04459 | -0.64516 | 1 |
| Glp2r     | 10.60692 | 8.562476 | 9.57249  | 9.067483 | -2.04445 | -1.03443 | 1 |
|           | 8.440767 | 6.396893 | 6.713552 | 6.555222 | -2.04387 | -1.72722 | 1 |
| Ang       | 13.77289 | 11.73003 | 12.56028 | 12.14515 | -2.04287 | -1.21261 | 1 |
| Ifna2     | 7.191518 | 5.152008 | 5.220608 | 5.186308 | -2.03951 | -1.97091 | 1 |
| Dapk2     | 9.772952 | 7.73463  | 8.29195  | 8.01329  | -2.03832 | -1.481   | 1 |
| Sst       | 15.82936 | 13.79164 | 14.23094 | 14.01129 | -2.03771 | -1.59842 | 1 |
| Dnm3      | 8.054508 | 6.017118 | 6.04874  | 6.032929 | -2.03739 | -2.00577 | 2 |
|           | 13.35827 | 11.32597 | 11.9549  | 11.64043 | -2.0323  | -1.40338 | 1 |
| Kir3dl2   | 7.538648 | 5.506985 | 5.330493 | 5.418739 | -2.03166 | -2.20816 | 2 |
| D830044I1 | 11.54809 | 9.516664 | 10.33571 | 9.926187 | -2.03143 | -1.21238 | 1 |
| Pvalb     | 13.01213 | 10.98218 | 11.75069 | 11.36644 | -2.02994 | -1.26144 | 1 |

|            |          |          |          |          |          |          |   |
|------------|----------|----------|----------|----------|----------|----------|---|
| Siglech    | 10.0124  | 7.982503 | 8.602195 | 8.292349 | -2.0299  | -1.41021 | 1 |
| Dopey1     | 13.78097 | 11.75217 | 11.99835 | 11.87526 | -2.0288  | -1.78262 | 1 |
|            | 5.341512 | 3.312992 | 3.871819 | 3.592406 | -2.02852 | -1.46969 | 1 |
| Gabrd      | 13.15938 | 11.13107 | 10.75402 | 10.94255 | -2.02831 | -2.40536 | 2 |
| 1700048F0  | 8.481886 | 6.454006 | 7.610643 | 7.032325 | -2.02788 | -0.87124 | 1 |
| Pkhd1      | 12.28318 | 10.25698 | 10.96406 | 10.61052 | -2.02619 | -1.31911 | 1 |
|            | 9.917333 | 7.892242 | 8.603037 | 8.247639 | -2.02509 | -1.3143  | 1 |
| Sprr1b     | 6.752655 | 4.728082 | 4.096871 | 4.412476 | -2.02457 | -2.65578 | 2 |
| Ccl25      | 5.721138 | 3.697897 | 4.239161 | 3.968529 | -2.02324 | -1.48198 | 1 |
|            | 7.760212 | 5.737643 | 5.873461 | 5.805552 | -2.02257 | -1.88675 | 1 |
| Akr1c18    | 11.07659 | 9.054629 | 10.60387 | 9.82925  | -2.02196 | -0.47272 | 1 |
| Btg2       | 13.35302 | 11.33181 | 11.68574 | 11.50878 | -2.02121 | -1.66728 | 1 |
| 9230102K2  | 5.604993 | 3.585049 | 4.712934 | 4.148992 | -2.01994 | -0.89206 | 1 |
| LOC433198  | 5.3574   | 3.33957  | 5.568618 | 4.454094 | -2.01783 | 0.211219 | 1 |
| Cckbr      | 13.12364 | 11.10818 | 11.37558 | 11.24188 | -2.01546 | -1.74806 | 1 |
| Sass6      | 11.372   | 9.358521 | 10.13126 | 9.744889 | -2.01348 | -1.24075 | 1 |
| 4921513108 | 5.955634 | 3.942409 | 4.602397 | 4.272403 | -2.01322 | -1.35324 | 1 |
| D11Ertd71  | 9.930162 | 7.917358 | 8.788272 | 8.352815 | -2.0128  | -1.14189 | 1 |
| Frem2      | 13.11946 | 11.10741 | 11.85761 | 11.48251 | -2.01205 | -1.26185 | 1 |
| Vipr1      | 11.40002 | 9.389543 | 10.05656 | 9.723052 | -2.01047 | -1.34346 | 1 |
| Klhl14     | 8.329209 | 6.319806 | 6.650797 | 6.485301 | -2.0094  | -1.67841 | 1 |
| Pttg1      | 6.707814 | 4.699625 | 5.213195 | 4.95641  | -2.00819 | -1.49462 | 1 |
| Aoc3       | 12.19729 | 10.18963 | 9.819067 | 10.00435 | -2.00766 | -2.37822 | 2 |
| Acap1      | 9.074317 | 7.067804 | 7.335014 | 7.201409 | -2.00651 | -1.7393  | 1 |
| Hspb9      | 10.58127 | 8.575444 | 9.2514   | 8.913422 | -2.00583 | -1.32987 | 1 |
| Kcnh4      | 12.46858 | 10.46538 | 10.34347 | 10.40442 | -2.00321 | -2.12512 | 2 |
| Sox30      | 6.254779 | 4.251712 | 4.653242 | 4.452477 | -2.00307 | -1.60154 | 1 |
| 4930423D2  | 10.82501 | 8.824597 | 9.380896 | 9.102747 | -2.00041 | -1.44411 | 1 |
| Il1rapl2   | 8.536713 | 6.539086 | 6.356819 | 6.447953 | -1.99763 | -2.17989 | 1 |
| Cacna2d1   | 8.025836 | 6.049717 | 4.612186 | 5.330951 | -1.97612 | -3.41365 | 1 |
| Frzb       | 11.58943 | 9.623245 | 9.547451 | 9.585348 | -1.96618 | -2.04197 | 1 |
| A130072N6  | 11.03912 | 9.081973 | 8.981923 | 9.031948 | -1.95714 | -2.05719 | 1 |
| Colq       | 6.595164 | 4.638678 | 3.858942 | 4.24881  | -1.95649 | -2.73622 | 1 |
| Nova1      | 6.850838 | 4.919599 | 4.316634 | 4.618116 | -1.93124 | -2.5342  | 1 |
| Nrgn       | 15.51104 | 13.59573 | 13.05658 | 13.32615 | -1.91532 | -2.45446 | 1 |
| Gm2560     | 7.296133 | 5.383666 | 4.533072 | 4.958369 | -1.91247 | -2.76306 | 1 |
| Cabp1      | 10.44451 | 8.532109 | 8.032432 | 8.282271 | -1.9124  | -2.41208 | 1 |
| Slc24a2    | 6.564206 | 4.654325 | 3.688638 | 4.171481 | -1.90988 | -2.87557 | 1 |
| Kif21a     | 10.78082 | 8.873343 | 8.646565 | 8.759954 | -1.90748 | -2.13426 | 1 |
| D4Ertd3356 | 6.281281 | 4.376775 | 3.612371 | 3.994573 | -1.90451 | -2.66891 | 1 |
| Olfr1143   | 13.07722 | 11.17442 | 10.98187 | 11.07815 | -1.9028  | -2.09535 | 1 |
| Atp2b2     | 9.85329  | 7.951685 | 6.889387 | 7.420536 | -1.90161 | -2.9639  | 1 |
| Pp2d1      | 8.332178 | 6.442744 | 6.140342 | 6.291543 | -1.88943 | -2.19184 | 1 |
| Cdyl       | 7.678346 | 5.809764 | 4.435395 | 5.12258  | -1.86858 | -3.24295 | 1 |
|            | 6.676331 | 4.810656 | 4.353053 | 4.581854 | -1.86568 | -2.32328 | 1 |
| Gm4981     | 6.842811 | 4.979061 | 4.538978 | 4.759019 | -1.86375 | -2.30383 | 1 |
| Cst11      | 8.660915 | 6.799141 | 6.51747  | 6.658305 | -1.86177 | -2.14344 | 1 |

|           |          |          |          |          |          |          |   |
|-----------|----------|----------|----------|----------|----------|----------|---|
| Ep300     | 7.495159 | 5.639788 | 5.240387 | 5.440088 | -1.85537 | -2.25477 | 1 |
| Nhlrc3    | 9.004926 | 7.152089 | 6.941476 | 7.046782 | -1.85284 | -2.06345 | 1 |
| Arap2     | 7.227336 | 5.376986 | 5.119173 | 5.248079 | -1.85035 | -2.10816 | 1 |
| A830009L0 | 6.758499 | 4.910769 | 4.66663  | 4.788699 | -1.84773 | -2.09187 | 1 |
| Pbrm1     | 8.197292 | 6.35203  | 5.697458 | 6.024744 | -1.84526 | -2.49983 | 1 |
|           | 9.228436 | 7.384789 | 6.958089 | 7.171439 | -1.84365 | -2.27035 | 1 |
| Basp1     | 8.156972 | 6.31924  | 5.541096 | 5.930168 | -1.83773 | -2.61588 | 1 |
| Pdha2     | 7.192563 | 5.35814  | 4.794992 | 5.076566 | -1.83442 | -2.39757 | 1 |
| Robo3     | 11.42125 | 9.607917 | 9.119372 | 9.363645 | -1.81333 | -2.30188 | 1 |
| LOC101056 | 6.165268 | 4.356587 | 4.123411 | 4.239999 | -1.80868 | -2.04186 | 1 |
| Trp53tg5  | 14.08102 | 12.2853  | 11.98445 | 12.13488 | -1.79572 | -2.09657 | 1 |
| Mgst3     | 11.02703 | 9.232582 | 8.532461 | 8.882522 | -1.79444 | -2.49457 | 1 |
|           | 8.350482 | 6.566587 | 6.142954 | 6.35477  | -1.7839  | -2.20753 | 1 |
| Myo7b     | 6.130582 | 4.363975 | 2.322894 | 3.343435 | -1.76661 | -3.80769 | 1 |
| Pde4d     | 7.901144 | 6.137563 | 5.505559 | 5.821561 | -1.76358 | -2.39559 | 1 |
| Chm       | 7.248067 | 5.484837 | 4.833594 | 5.159216 | -1.76323 | -2.41447 | 1 |
| Ksr2      | 6.478641 | 4.721054 | 2.769909 | 3.745482 | -1.75759 | -3.70873 | 1 |
| Fam105a   | 8.493255 | 6.740844 | 6.142378 | 6.441611 | -1.75241 | -2.35088 | 1 |
| 4632434I1 | 6.70748  | 4.958161 | 2.91645  | 3.937306 | -1.74932 | -3.79103 | 1 |
| Stx1a     | 9.84802  | 8.111461 | 7.628189 | 7.869825 | -1.73656 | -2.21983 | 1 |
| Cwc25     | 7.058556 | 5.344831 | 4.872551 | 5.108691 | -1.71372 | -2.186   | 1 |
| Opcml     | 8.641493 | 6.935404 | 6.205536 | 6.57047  | -1.70609 | -2.43596 | 1 |
|           | 11.03415 | 9.332666 | 8.968399 | 9.150533 | -1.70148 | -2.06575 | 1 |
| 2210017I0 | 14.16001 | 12.47412 | 12.12182 | 12.29797 | -1.6859  | -2.0382  | 1 |
| Zfp445    | 6.196633 | 4.526678 | 3.409098 | 3.967888 | -1.66996 | -2.78753 | 1 |
| Cacna1a   | 13.89898 | 12.23131 | 11.83494 | 12.03313 | -1.66767 | -2.06404 | 1 |
| Ntrk2     | 10.9874  | 9.321898 | 8.846874 | 9.084386 | -1.6655  | -2.14053 | 1 |
| Obox3     | 6.424304 | 4.785599 | 3.654666 | 4.220132 | -1.6387  | -2.76964 | 1 |
| Insig1    | 7.348276 | 5.711538 | 5.070924 | 5.391231 | -1.63674 | -2.27735 | 1 |
| Kalrn     | 9.565182 | 7.937122 | 7.45817  | 7.697646 | -1.62806 | -2.10701 | 1 |
| 2410125D1 | 8.528195 | 6.916906 | 6.402666 | 6.659786 | -1.61129 | -2.12553 | 1 |
| Rictor    | 7.760404 | 6.160039 | 5.488034 | 5.824037 | -1.60036 | -2.27237 | 1 |
| 9030425P0 | 7.440713 | 5.845413 | 5.228166 | 5.53679  | -1.5953  | -2.21255 | 1 |
| Sgcz      | 8.276832 | 6.684398 | 6.230773 | 6.457586 | -1.59243 | -2.04606 | 1 |
| Mical2    | 8.366575 | 6.789247 | 6.137051 | 6.463149 | -1.57733 | -2.22952 | 1 |
| Mgst3     | 11.25077 | 9.680146 | 9.099684 | 9.389915 | -1.57063 | -2.15109 | 1 |
|           | 6.533822 | 4.969089 | 4.216641 | 4.592865 | -1.56473 | -2.31718 | 1 |
| Adam33    | 7.39225  | 5.831996 | 5.07413  | 5.453063 | -1.56025 | -2.31812 | 1 |
|           | 7.528619 | 5.970948 | 4.842111 | 5.40653  | -1.55767 | -2.68651 | 1 |
| Scara5    | 6.194178 | 4.650902 | 2.527405 | 3.589154 | -1.54328 | -3.66677 | 1 |
| Ccne1     | 6.360496 | 4.823296 | 4.356587 | 4.589942 | -1.5372  | -2.00391 | 1 |
| Crebzf    | 9.413351 | 7.877189 | 7.262423 | 7.569806 | -1.53616 | -2.15093 | 1 |
| Slc12a1   | 6.456368 | 4.927225 | 2.322894 | 3.62506  | -1.52914 | -4.13347 | 1 |
| Fxyd7     | 10.03426 | 8.522484 | 7.973032 | 8.247758 | -1.51177 | -2.06123 | 1 |
| Rnf148    | 8.294918 | 6.784554 | 6.133079 | 6.458816 | -1.51036 | -2.16184 | 1 |
| 1110013I0 | 8.31847  | 6.810849 | 6.031292 | 6.421071 | -1.50762 | -2.28718 | 1 |
| Ppp2r2b   | 8.253547 | 6.747068 | 6.104912 | 6.42599  | -1.50648 | -2.14863 | 1 |

|           |          |          |          |          |          |          |   |
|-----------|----------|----------|----------|----------|----------|----------|---|
| Rassf3    | 8.229416 | 6.728467 | 5.711163 | 6.219815 | -1.50095 | -2.51825 | 1 |
| Adcy1     | 13.50587 | 12.01859 | 11.24641 | 11.6325  | -1.48728 | -2.25946 | 1 |
| Ntm       | 9.269151 | 7.785493 | 7.042691 | 7.414092 | -1.48366 | -2.22646 | 1 |
| Tmem198   | 10.86983 | 9.400668 | 8.754597 | 9.077633 | -1.46916 | -2.11523 | 1 |
| Rpe65     | 9.348624 | 7.891628 | 6.851212 | 7.37142  | -1.457   | -2.49741 | 1 |
| Scn1a     | 8.934686 | 7.495983 | 6.493547 | 6.994765 | -1.4387  | -2.44114 | 1 |
| E130012A1 | 13.84128 | 12.40619 | 11.65262 | 12.02941 | -1.43509 | -2.18866 | 1 |
| Rcor3     | 7.202372 | 5.783456 | 4.886365 | 5.334911 | -1.41892 | -2.31601 | 1 |
| Crhr1     | 11.58614 | 10.17874 | 9.449184 | 9.813964 | -1.40739 | -2.13695 | 1 |
| Kcnk12    | 7.816809 | 6.428896 | 5.00132  | 5.715108 | -1.38791 | -2.81549 | 1 |
| Dusp8     | 11.79121 | 10.41338 | 9.667384 | 10.04038 | -1.37784 | -2.12383 | 1 |
|           | 6.557557 | 5.18954  | 4.282539 | 4.73604  | -1.36802 | -2.27502 | 1 |
| Smarcd1   | 7.135967 | 5.793285 | 4.491725 | 5.142505 | -1.34268 | -2.64424 | 1 |
| Crhr1     | 5.878898 | 4.561319 | 3.725307 | 4.143313 | -1.31758 | -2.15359 | 1 |
|           | 5.447325 | 4.136576 | 3.150373 | 3.643474 | -1.31075 | -2.29695 | 1 |
| Rims2     | 9.608623 | 8.312002 | 7.526572 | 7.919287 | -1.29662 | -2.08205 | 1 |
| Gm129     | 11.50885 | 10.2135  | 8.913364 | 9.56343  | -1.29535 | -2.59549 | 1 |
| Olfm1     | 11.91683 | 10.6331  | 9.901703 | 10.2674  | -1.28373 | -2.01513 | 1 |
| Cuedc1    | 6.997539 | 5.71424  | 4.632644 | 5.173442 | -1.2833  | -2.36489 | 1 |
|           | 5.831688 | 4.55057  | 3.312593 | 3.931581 | -1.28112 | -2.51909 | 1 |
| Foxp1     | 9.498875 | 8.2282   | 7.425903 | 7.827052 | -1.27068 | -2.07297 | 1 |
| Trim43c   | 7.18519  | 5.914763 | 2.322894 | 4.118829 | -1.27043 | -4.8623  | 1 |
|           | 6.468071 | 5.200807 | 2.322894 | 3.76185  | -1.26726 | -4.14518 | 1 |
| Rnpc3     | 8.585537 | 7.330711 | 6.541142 | 6.935926 | -1.25483 | -2.0444  | 1 |
| Gm4598    | 6.387701 | 5.147077 | 3.943976 | 4.545527 | -1.24062 | -2.44373 | 1 |
| Cd6       | 11.49764 | 10.2824  | 9.404034 | 9.843215 | -1.21524 | -2.09361 | 1 |
|           | 5.983158 | 4.769371 | 3.471741 | 4.120556 | -1.21379 | -2.51142 | 1 |
| Cbx3      | 7.122995 | 5.91077  | 4.909854 | 5.410312 | -1.21223 | -2.21314 | 1 |
| B3gat3    | 7.128652 | 5.927681 | 4.825512 | 5.376596 | -1.20097 | -2.30314 | 1 |
| Twistnb   | 7.670349 | 6.47299  | 5.552964 | 6.012977 | -1.19736 | -2.11738 | 1 |
| Mup1      | 6.074969 | 4.8857   | 3.867541 | 4.376621 | -1.18927 | -2.20743 | 1 |
| Col23a1   | 8.348094 | 7.218767 | 5.632809 | 6.425788 | -1.12933 | -2.71529 | 1 |
| Ankrd33b  | 9.198228 | 8.078883 | 6.908828 | 7.493856 | -1.11935 | -2.2894  | 1 |
| D1Ert448i | 5.964357 | 4.85002  | 3.590483 | 4.220252 | -1.11434 | -2.37387 | 1 |
| Catsperd  | 6.017474 | 4.903382 | 3.986477 | 4.44493  | -1.11409 | -2.031   | 1 |
| Gm1971    | 5.625711 | 4.599282 | 3.144503 | 3.871892 | -1.02643 | -2.48121 | 1 |
| Atxn7l2   | 6.305722 | 5.2845   | 3.481916 | 4.383208 | -1.02122 | -2.82381 | 1 |
| Meg3      | 11.69219 | 10.68761 | 9.223824 | 9.955719 | -1.00458 | -2.46837 | 1 |
| Nanog     | 5.776053 | 4.811573 | 3.412651 | 4.112112 | -0.96448 | -2.3634  | 1 |
| Slc22a20  | 5.393691 | 4.468586 | 2.322894 | 3.39574  | -0.9251  | -3.0708  | 1 |
| 90306220i | 6.282806 | 5.369349 | 3.671123 | 4.520236 | -0.91346 | -2.61168 | 1 |
| Spop      | 7.280074 | 6.378501 | 4.885814 | 5.632157 | -0.90157 | -2.39426 | 1 |
| LOC101056 | 5.50395  | 4.622984 | 2.322894 | 3.472939 | -0.88097 | -3.18106 | 1 |
| Bglap     | 5.583721 | 4.703643 | 2.766884 | 3.735264 | -0.88008 | -2.81684 | 1 |
|           | 6.031768 | 5.153827 | 3.652835 | 4.403331 | -0.87794 | -2.37893 | 1 |
| BC030499  | 10.32114 | 9.450209 | 8.213569 | 8.831889 | -0.87093 | -2.10757 | 1 |
|           | 6.269209 | 5.406588 | 2.783446 | 4.095017 | -0.86262 | -3.48576 | 1 |



|           |          |          |          |          |          |          |   |
|-----------|----------|----------|----------|----------|----------|----------|---|
| Gm12302   | 5.106425 | 4.272895 | 2.322894 | 3.297895 | -0.83353 | -2.78353 | 1 |
| Abca5     | 5.469111 | 4.662102 | 3.352268 | 4.007185 | -0.80701 | -2.11684 | 1 |
| Aqp12     | 5.076032 | 4.269492 | 2.846571 | 3.558032 | -0.80654 | -2.22946 | 1 |
| Zdhhc19   | 5.792178 | 4.993686 | 3.644783 | 4.319234 | -0.79849 | -2.14739 | 1 |
| Heph      | 5.160955 | 4.367038 | 2.545204 | 3.456121 | -0.79392 | -2.61575 | 1 |
| Igfbp1    | 7.445373 | 6.669903 | 5.151031 | 5.910467 | -0.77547 | -2.29434 | 1 |
| Gpx6      | 6.05186  | 5.276728 | 2.322894 | 3.799811 | -0.77513 | -3.72897 | 1 |
| Krtap11-1 | 6.194544 | 5.429953 | 3.98326  | 4.706606 | -0.76459 | -2.21128 | 1 |
| Col4a4    | 7.790871 | 7.055328 | 3.718597 | 5.386963 | -0.73554 | -4.07227 | 1 |
| Gm6600    | 6.443908 | 5.744516 | 3.890691 | 4.817604 | -0.69939 | -2.55322 | 1 |
| Hnrnp1    | 7.697831 | 7.026937 | 5.670252 | 6.348594 | -0.67089 | -2.02758 | 1 |
| Neurog2   | 5.904776 | 5.26156  | 3.696173 | 4.478866 | -0.64322 | -2.2086  | 1 |
|           | 5.096318 | 4.455047 | 2.710094 | 3.58257  | -0.64127 | -2.38622 | 1 |
| Kcnma1    | 7.61679  | 6.994232 | 5.25165  | 6.122941 | -0.62256 | -2.36514 | 1 |
| LOC553085 | 4.78964  | 4.168923 | 2.757051 | 3.462987 | -0.62072 | -2.03259 | 1 |
| 4932438A1 | 5.450316 | 4.866117 | 2.561623 | 3.71387  | -0.5842  | -2.88869 | 1 |
|           | 6.923874 | 6.363218 | 3.258648 | 4.810933 | -0.56066 | -3.66523 | 1 |
| Zkscan3   | 7.949201 | 7.397222 | 5.935575 | 6.666398 | -0.55198 | -2.01363 | 1 |
| Gm15466   | 8.199886 | 7.670888 | 5.711065 | 6.690977 | -0.529   | -2.48882 | 1 |
| Rapgef4   | 6.231685 | 5.7042   | 3.581204 | 4.642702 | -0.52748 | -2.65048 | 1 |
| Aspdh     | 6.740776 | 6.24787  | 4.578297 | 5.413083 | -0.49291 | -2.16248 | 1 |
|           | 5.419506 | 4.961465 | 2.882438 | 3.921952 | -0.45804 | -2.53707 | 1 |
| Kirrel2   | 7.383603 | 6.928134 | 5.231627 | 6.07988  | -0.45547 | -2.15198 | 1 |
| Rgs9bp    | 5.005344 | 4.574687 | 2.322894 | 3.448791 | -0.43066 | -2.68245 | 1 |
| Obp2a     | 4.75726  | 4.360724 | 2.322894 | 3.341809 | -0.39654 | -2.43437 | 1 |
| Trpv3     | 7.152792 | 6.795316 | 4.111019 | 5.453167 | -0.35748 | -3.04177 | 1 |
| Ptma      | 8.996029 | 8.688296 | 6.89267  | 7.790483 | -0.30773 | -2.10336 | 1 |
| 6330408AC | 4.80196  | 4.539513 | 2.478663 | 3.509088 | -0.26245 | -2.3233  | 1 |
| 5730419F0 | 7.08025  | 6.828079 | 4.487493 | 5.657786 | -0.25217 | -2.59276 | 1 |
| LOC100503 | 5.652055 | 5.415199 | 2.66871  | 4.041955 | -0.23686 | -2.98335 | 1 |
| Tbc1d16   | 5.667606 | 5.467499 | 3.552563 | 4.510031 | -0.20011 | -2.11504 | 1 |
| Gm3317    | 4.954837 | 4.770466 | 2.896704 | 3.833585 | -0.18437 | -2.05813 | 1 |
| Olf1404   | 7.834763 | 7.66332  | 4.401897 | 6.032609 | -0.17144 | -3.43287 | 1 |
|           | 4.932948 | 4.78362  | 2.552306 | 3.667963 | -0.14933 | -2.38064 | 1 |
| Cat       | 6.925662 | 6.778178 | 4.513568 | 5.645873 | -0.14748 | -2.41209 | 1 |
|           | 7.115001 | 6.97362  | 5.075544 | 6.024582 | -0.14138 | -2.03946 | 1 |
| Trp53bp1  | 4.852652 | 4.712767 | 2.386772 | 3.54977  | -0.13989 | -2.46588 | 1 |
|           | 6.744085 | 6.63823  | 4.407637 | 5.522934 | -0.10586 | -2.33645 | 1 |
| Gm4791    | 6.866602 | 6.768304 | 2.586832 | 4.677568 | -0.0983  | -4.27977 | 1 |
|           | 5.737314 | 5.650212 | 3.384471 | 4.517342 | -0.0871  | -2.35284 | 1 |
| 2210404OC | 6.376967 | 6.506956 | 4.311352 | 5.409154 | 0.129989 | -2.06562 | 1 |
| Dnmbp     | 4.806461 | 4.980183 | 2.623474 | 3.801829 | 0.173722 | -2.18299 | 1 |
| 4930554PC | 5.359929 | 5.635576 | 2.696301 | 4.165938 | 0.275647 | -2.66363 | 1 |
| Zfp866    | 6.437954 | 6.798296 | 3.684063 | 5.241179 | 0.360342 | -2.75389 | 1 |
| Hnf4a     | 7.57636  | 8.039906 | 5.2002   | 6.620053 | 0.463546 | -2.37616 | 1 |
| Gm6249    | 6.272333 | 6.784333 | 2.322894 | 4.553614 | 0.512    | -3.94944 | 1 |
| Gm7173    | 4.718621 | 5.247335 | 2.322894 | 3.785114 | 0.528714 | -2.39573 | 1 |

|           |          |          |          |          |          |          |   |
|-----------|----------|----------|----------|----------|----------|----------|---|
| Olf593    | 5.249986 | 5.82361  | 2.322894 | 4.073252 | 0.573624 | -2.92709 | 1 |
| Zscan4c   | 5.293754 | 5.894012 | 2.322894 | 4.108453 | 0.600258 | -2.97086 | 1 |
| Prss22    | 6.770372 | 7.482451 | 4.73783  | 6.110141 | 0.712079 | -2.03254 | 1 |
| Capza3    | 8.041021 | 8.770999 | 2.322894 | 5.546947 | 0.729978 | -5.71813 | 1 |
| Enpp6     | 6.666585 | 7.435849 | 2.322894 | 4.879372 | 0.769263 | -4.34369 | 1 |
| Slc39a11  | 4.913154 | 5.748332 | 2.749341 | 4.248836 | 0.835178 | -2.16381 | 1 |
| Gas7      | 6.975833 | 7.91091  | 4.855948 | 6.383429 | 0.935077 | -2.11989 | 1 |
| Tmprss11a | 5.436269 | 6.42947  | 3.180205 | 4.804837 | 0.9932   | -2.25606 | 1 |
| Olf1156   | 5.712269 | 6.939837 | 2.942858 | 4.941347 | 1.227568 | -2.76941 | 1 |
|           | 5.810777 | 7.466453 | 3.107235 | 5.286844 | 1.655676 | -2.70354 | 1 |
|           | 5.262799 | 8.386634 | 2.322894 | 5.354764 | 3.123835 | -2.9399  | 1 |

| GeneSymbol | Health   | TBI      | NSC      | TBI-NSC  | TBI-Health | NSC-Health | flag2 |
|------------|----------|----------|----------|----------|------------|------------|-------|
| Wee2       | 4.989603 | 2.337589 | 7.993508 | 5.165548 | -2.65201   | 3.003905   | 1     |
| Vmn1r77    | 4.638678 | 2.744582 | 7.010753 | 4.877667 | -1.8941    | 2.372075   | 1     |
| Slc5a7     | 7.349813 | 5.601529 | 9.648039 | 7.624784 | -1.74828   | 2.298226   | 1     |
| Olf1r730   | 7.119462 | 5.634644 | 9.265274 | 7.449959 | -1.48482   | 2.145812   | 1     |
| Fmr1       | 5.875811 | 4.724589 | 8.06599  | 6.39529  | -1.15122   | 2.190179   | 1     |
| Tph1       | 6.355723 | 5.395494 | 8.385705 | 6.890599 | -0.96023   | 2.029982   | 1     |
| 8430431K1  | 5.180718 | 4.251336 | 7.809025 | 6.03018  | -0.92938   | 2.628308   | 1     |
| 1700063HC  | 6.935981 | 6.166075 | 9.471724 | 7.8189   | -0.76991   | 2.535743   | 1     |
| Adamts14   | 5.321905 | 4.6154   | 7.476234 | 6.045817 | -0.7065    | 2.154329   | 1     |
| A230092J1  | 4.946532 | 4.251849 | 7.084644 | 5.668247 | -0.69468   | 2.138112   | 1     |
| Fga        | 5.158009 | 4.560694 | 8.101236 | 6.330965 | -0.59731   | 2.943227   | 1     |
|            | 5.613377 | 5.020046 | 7.617853 | 6.318949 | -0.59333   | 2.004476   | 1     |
|            | 4.888071 | 4.346704 | 8.333946 | 6.340325 | -0.54137   | 3.445875   | 1     |
| Ntm        | 6.017818 | 5.482298 | 8.546483 | 7.014391 | -0.53552   | 2.528665   | 1     |
| Tmem40     | 9.557745 | 9.071536 | 11.60093 | 10.33623 | -0.48621   | 2.043186   | 1     |
| Ttbk1      | 4.696848 | 4.224481 | 7.751941 | 5.988211 | -0.47237   | 3.055093   | 1     |
| Efcab5     | 7.404093 | 6.947453 | 9.482139 | 8.214796 | -0.45664   | 2.078046   | 1     |
|            | 5.046885 | 4.609316 | 8.162548 | 6.385932 | -0.43757   | 3.115663   | 1     |
| Gm5741     | 8.049566 | 7.617288 | 11.61843 | 9.61786  | -0.43228   | 3.568866   | 1     |
| Rtdr1      | 6.253794 | 5.857348 | 8.811265 | 7.334306 | -0.39645   | 2.557471   | 1     |
| Bend7      | 4.943798 | 4.582871 | 8.063391 | 6.323131 | -0.36093   | 3.119593   | 1     |
| Gm7167     | 4.379665 | 4.064026 | 6.957411 | 5.510719 | -0.31564   | 2.577746   | 1     |
| Clec12b    | 4.519917 | 4.273168 | 6.88128  | 5.577224 | -0.24675   | 2.361363   | 1     |
| Npw        | 9.130176 | 8.897781 | 12.94908 | 10.92343 | -0.2324    | 3.818904   | 1     |
| Snx22      | 7.683282 | 7.460032 | 9.782853 | 8.621442 | -0.22325   | 2.099571   | 1     |
| 4930517G1  | 5.696272 | 5.507232 | 8.368584 | 6.937908 | -0.18904   | 2.672312   | 1     |
| Gng8       | 7.657348 | 7.49505  | 10.6008  | 9.047927 | -0.1623    | 2.943456   | 1     |
| Vmn1r203   | 5.133408 | 5.019461 | 7.472183 | 6.245822 | -0.11395   | 2.338775   | 1     |
|            | 4.239739 | 4.128264 | 6.29744  | 5.212852 | -0.11148   | 2.057701   | 1     |
|            | 4.748037 | 4.644625 | 6.801058 | 5.722842 | -0.10341   | 2.053021   | 1     |
| Spef2      | 4.36258  | 4.297427 | 6.573321 | 5.435374 | -0.06515   | 2.210741   | 1     |
| Isg20I2    | 5.047808 | 4.991232 | 7.984666 | 6.487949 | -0.05658   | 2.936858   | 1     |
| 4921530L2  | 4.564216 | 4.515369 | 6.771998 | 5.643683 | -0.04885   | 2.207782   | 1     |
| Olf1r507   | 5.024159 | 4.992142 | 7.240446 | 6.116294 | -0.03202   | 2.216287   | 1     |
|            | 4.95017  | 4.971515 | 7.179093 | 6.075304 | 0.021345   | 2.228923   | 1     |
| Mb         | 4.97801  | 5.025669 | 7.932034 | 6.478851 | 0.047659   | 2.954024   | 1     |
| Barx2      | 4.522869 | 4.578832 | 6.697448 | 5.63814  | 0.055963   | 2.17458    | 1     |
| Sult2a2    | 4.173271 | 4.2634   | 6.835531 | 5.549465 | 0.090129   | 2.66226    | 1     |
| Atoh8      | 5.268442 | 5.360587 | 7.334387 | 6.347487 | 0.092145   | 2.065945   | 1     |
| Gm5800     | 4.671174 | 4.768777 | 7.149283 | 5.95903  | 0.097603   | 2.478109   | 1     |
| B230319CC  | 4.91442  | 5.012667 | 7.158288 | 6.085477 | 0.098247   | 2.243868   | 1     |
| Olf1r617   | 4.36575  | 4.485549 | 7.426658 | 5.956104 | 0.119799   | 3.060908   | 1     |
| 2610100L1  | 4.226822 | 4.364807 | 6.89765  | 5.631229 | 0.137985   | 2.670828   | 1     |
| Sdr9c7     | 4.800842 | 4.95254  | 7.670967 | 6.311754 | 0.151698   | 2.870125   | 1     |
| Fam219b    | 5.566204 | 5.756568 | 8.564154 | 7.160361 | 0.190364   | 2.99795    | 1     |
| Nuggc      | 4.95045  | 5.170924 | 8.012261 | 6.591593 | 0.220475   | 3.061812   | 1     |

|           |          |          |          |          |          |          |   |
|-----------|----------|----------|----------|----------|----------|----------|---|
|           | 4.205062 | 4.485989 | 6.765727 | 5.625858 | 0.280926 | 2.560664 | 1 |
| Six1      | 5.23043  | 5.579673 | 8.204453 | 6.892063 | 0.349243 | 2.974023 | 1 |
| Chrn4     | 6.774795 | 7.137191 | 9.38371  | 8.260451 | 0.362396 | 2.608915 | 1 |
| Map2k5    | 4.6081   | 4.973445 | 7.992105 | 6.482775 | 0.365346 | 3.384006 | 1 |
| Rpl39l    | 6.917575 | 7.298232 | 9.449773 | 8.374003 | 0.380657 | 2.532198 | 1 |
| Krt6b     | 5.259022 | 5.641499 | 7.731363 | 6.686431 | 0.382477 | 2.472341 | 1 |
| 170004201 | 4.374446 | 4.771464 | 6.643472 | 5.707468 | 0.397018 | 2.269025 | 1 |
|           | 5.184897 | 5.584979 | 7.473408 | 6.529193 | 0.400081 | 2.288511 | 1 |
| B3galt4   | 5.356055 | 5.758937 | 8.512798 | 7.135868 | 0.402882 | 3.156743 | 1 |
| Neurl4    | 4.239161 | 4.658796 | 7.526081 | 6.092439 | 0.419636 | 3.286921 | 1 |
| Krt5      | 4.694847 | 5.122133 | 7.426552 | 6.274343 | 0.427287 | 2.731706 | 1 |
| Scp2d1    | 4.155315 | 4.595937 | 6.181157 | 5.388547 | 0.440622 | 2.025842 | 1 |
| Olfr137   | 5.52752  | 5.977367 | 7.656458 | 6.816913 | 0.449847 | 2.128938 | 1 |
| Txk       | 5.780021 | 6.236667 | 7.824792 | 7.03073  | 0.456646 | 2.044771 | 1 |
| 6720401G1 | 5.894131 | 6.350777 | 8.07547  | 7.213123 | 0.456646 | 2.181339 | 1 |
| Pde11a    | 6.75066  | 7.252178 | 9.407584 | 8.329881 | 0.501518 | 2.656924 | 1 |
| Olfr166   | 3.983791 | 4.499703 | 7.734114 | 6.116908 | 0.515912 | 3.750323 | 1 |
| Zic4      | 7.437932 | 7.956277 | 9.440821 | 8.698549 | 0.518346 | 2.00289  | 1 |
| Tyrp1     | 5.513379 | 6.037118 | 9.227241 | 7.63218  | 0.523739 | 3.713862 | 1 |
| Crct1     | 4.710836 | 5.236781 | 7.469817 | 6.353299 | 0.525944 | 2.758981 | 1 |
| 2810021J2 | 4.968535 | 5.496327 | 7.612462 | 6.554395 | 0.527793 | 2.643927 | 1 |
| Kctd12    | 12.8838  | 13.41589 | 17.36792 | 15.39191 | 0.532097 | 4.484127 | 1 |
| Orm2      | 4.323937 | 4.860908 | 7.471273 | 6.16609  | 0.536971 | 3.147336 | 1 |
| Rgs13     | 5.51523  | 6.053251 | 8.770098 | 7.411675 | 0.538022 | 3.254868 | 1 |
| Fam19a3   | 4.974893 | 5.514117 | 7.228958 | 6.371538 | 0.539224 | 2.254065 | 1 |
| Prph2     | 5.894012 | 6.434207 | 8.041021 | 7.237614 | 0.540195 | 2.147009 | 1 |
|           | 4.061519 | 4.656551 | 6.221063 | 5.438807 | 0.595032 | 2.159544 | 1 |
| Drd4      | 7.554462 | 8.154881 | 9.792169 | 8.973525 | 0.60042  | 2.237708 | 1 |
|           | 4.523149 | 5.124214 | 6.731673 | 5.927944 | 0.601065 | 2.208524 | 1 |
| Defa3     | 5.371313 | 5.984293 | 7.519255 | 6.751774 | 0.61298  | 2.147942 | 1 |
| Ccdc153   | 7.904485 | 8.535133 | 10.31273 | 9.423932 | 0.630648 | 2.408245 | 1 |
| Klra1     | 4.281607 | 4.944392 | 7.642442 | 6.293417 | 0.662785 | 3.360835 | 1 |
| Tmem212   | 7.902229 | 8.566382 | 10.42853 | 9.497455 | 0.664153 | 2.526298 | 1 |
| Cdhr3     | 6.423654 | 7.099679 | 8.627046 | 7.863363 | 0.676025 | 2.203392 | 1 |
| Thbs4     | 10.8104  | 11.48675 | 13.2748  | 12.38078 | 0.676348 | 2.464405 | 1 |
| Ube2h     | 5.469766 | 6.146348 | 7.662561 | 6.904455 | 0.676582 | 2.192796 | 1 |
| Lrrc15    | 4.21074  | 4.913009 | 6.744592 | 5.828801 | 0.702269 | 2.533852 | 1 |
| Ankrd33   | 3.747081 | 4.456444 | 6.483756 | 5.4701   | 0.709363 | 2.736675 | 1 |
| Defa-rs12 | 6.350041 | 7.090436 | 8.891364 | 7.9909   | 0.740395 | 2.541323 | 1 |
| F2        | 5.899198 | 6.644689 | 7.909539 | 7.277114 | 0.745491 | 2.010341 | 1 |
|           | 4.650902 | 5.399401 | 6.80617  | 6.102786 | 0.748499 | 2.155268 | 1 |
|           | 5.710583 | 6.478641 | 7.940613 | 7.209627 | 0.768058 | 2.23003  | 1 |
| Cnga3     | 4.735819 | 5.50401  | 6.984974 | 6.244492 | 0.768191 | 2.249155 | 1 |
| Tnn       | 5.877082 | 6.650192 | 9.156961 | 7.903576 | 0.77311  | 3.279879 | 1 |
| Mogat1    | 6.0551   | 6.844227 | 9.082854 | 7.963541 | 0.789127 | 3.027754 | 1 |
| Gm7849    | 6.715045 | 7.507487 | 9.855433 | 8.68146  | 0.792442 | 3.140388 | 1 |
| Slc18a2   | 3.364226 | 4.200416 | 5.810122 | 5.005269 | 0.83619  | 2.445896 | 1 |

|           |          |          |          |          |          |          |   |
|-----------|----------|----------|----------|----------|----------|----------|---|
| 160002911 | 6.26693  | 7.107382 | 8.472126 | 7.789754 | 0.840452 | 2.205196 | 1 |
| Ms4a10    | 3.910913 | 4.759715 | 5.940317 | 5.350016 | 0.848801 | 2.029404 | 1 |
| Krt15     | 3.924768 | 4.824176 | 6.14417  | 5.484173 | 0.899408 | 2.219402 | 1 |
| Gm9948    | 5.671224 | 6.589402 | 8.322472 | 7.455937 | 0.918178 | 2.651248 | 1 |
| Cryba2    | 5.659308 | 6.620216 | 7.847487 | 7.233852 | 0.960909 | 2.18818  | 1 |
| Lpar3     | 4.522245 | 5.486322 | 6.58394  | 6.035131 | 0.964077 | 2.061695 | 1 |
| Cnpy4     | 3.627126 | 4.624692 | 6.154689 | 5.389691 | 0.997566 | 2.527563 | 1 |
|           | 3.228838 | 4.228038 | 7.244004 | 5.736021 | 0.9992   | 4.015166 | 1 |
| Lce1a1    | 4.08128  | 5.093551 | 6.758163 | 5.925857 | 1.012271 | 2.676883 | 1 |
| Erc1      | 5.701593 | 6.724902 | 8.475844 | 7.600373 | 1.023309 | 2.774251 | 1 |
|           | 4.849129 | 5.889039 | 8.018199 | 6.953619 | 1.03991  | 3.16907  | 1 |
| Igf1      | 8.396029 | 9.448273 | 11.11774 | 10.283   | 1.052244 | 2.721707 | 1 |
| Igf1      | 9.109586 | 10.1914  | 11.87477 | 11.03308 | 1.08181  | 2.765185 | 1 |
| Gm5868    | 5.275405 | 6.361851 | 7.278272 | 6.820061 | 1.086445 | 2.002867 | 1 |
| 1700001K2 | 4.873082 | 5.964357 | 7.037515 | 6.500936 | 1.091275 | 2.164433 | 1 |
| Stk32b    | 4.007206 | 5.106211 | 6.944649 | 6.02543  | 1.099005 | 2.937443 | 1 |
|           | 3.942985 | 5.062364 | 6.024574 | 5.543469 | 1.119379 | 2.08159  | 1 |
| Layn      | 5.16881  | 6.290325 | 7.470023 | 6.880174 | 1.121515 | 2.301213 | 1 |
|           | 4.071075 | 5.219449 | 6.288982 | 5.754216 | 1.148374 | 2.217907 | 1 |
| Mnd1      | 8.876011 | 10.03154 | 10.89668 | 10.46411 | 1.155525 | 2.020667 | 1 |
| Plxna4os1 | 3.883671 | 5.049049 | 5.973482 | 5.511266 | 1.165379 | 2.089811 | 1 |
| Ush1c     | 5.511762 | 6.677752 | 7.572891 | 7.125321 | 1.16599  | 2.061129 | 1 |
|           | 3.533234 | 4.706293 | 6.260247 | 5.48327  | 1.173059 | 2.727013 | 1 |
| Tspan18   | 9.505998 | 10.6794  | 11.74163 | 11.21051 | 1.173399 | 2.235628 | 1 |
| Tmprss3   | 4.033859 | 5.215118 | 6.625311 | 5.920215 | 1.181259 | 2.591452 | 1 |
| 1110014L1 | 5.634181 | 6.819274 | 8.008925 | 7.414099 | 1.185094 | 2.374744 | 1 |
| Fbp1      | 7.560125 | 8.749336 | 9.767064 | 9.2582   | 1.189211 | 2.206939 | 1 |
| Defa-rs10 | 7.088018 | 8.284296 | 10.00215 | 9.143223 | 1.196278 | 2.914131 | 1 |
| Gm609     | 3.29064  | 4.487493 | 6.716941 | 5.602217 | 1.196853 | 3.426301 | 1 |
| Gm9876    | 5.674959 | 6.891197 | 7.965582 | 7.42839  | 1.216238 | 2.290624 | 1 |
| Gm5113    | 5.370485 | 6.591522 | 7.489531 | 7.040527 | 1.221037 | 2.119046 | 1 |
| Hemt1     | 4.500703 | 5.724087 | 7.457682 | 6.590884 | 1.223384 | 2.956979 | 1 |
| Lhx3      | 5.784448 | 7.020634 | 8.157991 | 7.589313 | 1.236186 | 2.373543 | 1 |
| Slc36a2   | 6.421367 | 7.664    | 9.316763 | 8.490382 | 1.242633 | 2.895396 | 1 |
| Mmp2      | 4.351392 | 5.604674 | 6.452025 | 6.028349 | 1.253282 | 2.100632 | 1 |
|           | 3.890691 | 5.159382 | 6.436394 | 5.797888 | 1.268691 | 2.545703 | 1 |
| Mgarp     | 5.392144 | 6.670971 | 8.03369  | 7.35233  | 1.278827 | 2.641546 | 1 |
| Il16      | 7.662561 | 8.9443   | 9.881109 | 9.412705 | 1.281739 | 2.218548 | 1 |
| Slc25a37  | 3.426164 | 4.709622 | 6.710311 | 5.709966 | 1.283459 | 3.284147 | 1 |
| Chrna3    | 4.684552 | 5.970024 | 8.659266 | 7.314645 | 1.285472 | 3.974714 | 1 |
|           | 5.389931 | 6.687345 | 7.726741 | 7.207043 | 1.297414 | 2.336811 | 1 |
| Exoc3l4   | 7.036764 | 8.371417 | 9.236292 | 8.803855 | 1.334653 | 2.199528 | 1 |
| Nanog     | 4.451314 | 5.803803 | 6.899064 | 6.351434 | 1.352489 | 2.44775  | 1 |
| Aqp4      | 12.05572 | 13.40837 | 14.23951 | 13.82394 | 1.352653 | 2.183796 | 1 |
| Casr      | 3.534901 | 4.893264 | 5.905627 | 5.399446 | 1.358363 | 2.370726 | 1 |
| Slc3a1    | 2.851579 | 4.211523 | 5.738313 | 4.974918 | 1.359944 | 2.886733 | 1 |
| Atf7      | 5.284433 | 6.661398 | 8.601088 | 7.631243 | 1.376965 | 3.316655 | 1 |

|           |          |          |          |          |          |          |   |
|-----------|----------|----------|----------|----------|----------|----------|---|
| Irx1      | 7.387182 | 8.782259 | 9.991997 | 9.387128 | 1.395077 | 2.604815 | 1 |
| Fam81b    | 3.949642 | 5.348196 | 6.287101 | 5.817649 | 1.398554 | 2.337459 | 1 |
|           | 4.627877 | 6.029659 | 7.180803 | 6.605231 | 1.401782 | 2.552926 | 1 |
| Grpel2    | 4.361189 | 5.76389  | 6.966557 | 6.365224 | 1.402701 | 2.605368 | 1 |
| Kcne1l    | 9.736063 | 11.14347 | 12.24675 | 11.69511 | 1.407411 | 2.510687 | 1 |
| Defa-rs2  | 2.864632 | 4.293413 | 6.26584  | 5.279626 | 1.428781 | 3.401208 | 1 |
| H2-M11    | 4.335971 | 5.765391 | 6.391591 | 6.078491 | 1.42942  | 2.05562  | 1 |
| Gm14625   | 7.861848 | 9.29316  | 9.90392  | 9.59854  | 1.431311 | 2.042072 | 1 |
|           | 4.161147 | 5.601357 | 8.052122 | 6.82674  | 1.44021  | 3.890975 | 1 |
| 1700001CC | 5.76389  | 7.204252 | 7.815273 | 7.509763 | 1.440362 | 2.051383 | 1 |
| Olfr675   | 3.264539 | 4.718211 | 5.277268 | 4.99774  | 1.453672 | 2.01273  | 1 |
| 3830403N1 | 4.472429 | 5.926418 | 6.777488 | 6.351953 | 1.453989 | 2.305059 | 1 |
| Popdc3    | 3.821835 | 5.280322 | 5.921703 | 5.601012 | 1.458487 | 2.099868 | 1 |
| Atp6v0d2  | 3.449479 | 4.909854 | 5.92903  | 5.419442 | 1.460376 | 2.479551 | 1 |
| Wdr63     | 6.14989  | 7.613157 | 8.957604 | 8.285381 | 1.463268 | 2.807715 | 1 |
| Irx5      | 3.090148 | 4.554461 | 5.640456 | 5.097458 | 1.464313 | 2.550308 | 1 |
| Prom2     | 3.2274   | 4.70616  | 5.610877 | 5.158518 | 1.47876  | 2.383477 | 1 |
| Olfr320   | 3.613853 | 5.098988 | 5.997082 | 5.548035 | 1.485135 | 2.38323  | 1 |
| Sct       | 5.798085 | 7.293712 | 9.586068 | 8.43989  | 1.495627 | 3.787983 | 1 |
| Fam169b   | 5.809764 | 7.306354 | 8.814218 | 8.060286 | 1.49659  | 3.004454 | 1 |
| Unc93a    | 4.682789 | 6.192837 | 7.09071  | 6.641774 | 1.510048 | 2.407921 | 1 |
| Lrrc34    | 4.890704 | 6.411207 | 7.342115 | 6.876661 | 1.520503 | 2.451411 | 1 |
| Stc2      | 3.227124 | 4.75671  | 6.923874 | 5.840292 | 1.529586 | 3.696751 | 1 |
| Zfp462    | 3.552141 | 5.086485 | 7.540038 | 6.313261 | 1.534345 | 3.987897 | 1 |
| Eppin     | 3.505359 | 5.050471 | 6.331957 | 5.691214 | 1.545112 | 2.826598 | 1 |
| Pygl      | 7.931652 | 9.478419 | 10.1137  | 9.796059 | 1.546767 | 2.182047 | 1 |
| Mlph      | 6.228748 | 7.782419 | 8.336395 | 8.059407 | 1.553671 | 2.107647 | 1 |
| Yipf6     | 4.471272 | 6.035338 | 6.651392 | 6.343365 | 1.564066 | 2.18012  | 1 |
| E030010NC | 4.99738  | 6.569447 | 7.358578 | 6.964013 | 1.572067 | 2.361198 | 1 |
| Isoc2b    | 5.727184 | 7.31575  | 8.121389 | 7.718569 | 1.588566 | 2.394205 | 1 |
| Slitrk6   | 4.705534 | 6.295171 | 7.388661 | 6.841916 | 1.589637 | 2.683127 | 1 |
| Efhb      | 4.962545 | 6.553804 | 7.115689 | 6.834747 | 1.591259 | 2.153144 | 1 |
| Wnt9b     | 4.995013 | 6.58751  | 7.132289 | 6.859899 | 1.592497 | 2.137276 | 1 |
| Zfp474    | 4.066498 | 5.666111 | 6.266293 | 5.966202 | 1.599613 | 2.199795 | 1 |
| Shisa6    | 10.93437 | 12.54757 | 12.9394  | 12.74349 | 1.613198 | 2.005031 | 1 |
| Otos      | 4.51264  | 6.126263 | 7.398033 | 6.762148 | 1.613624 | 2.885394 | 1 |
| Abca1     | 11.8149  | 13.43115 | 14.02987 | 13.73051 | 1.61625  | 2.214963 | 1 |
| Tug1      | 4.535912 | 6.167839 | 6.86906  | 6.518449 | 1.631927 | 2.333148 | 1 |
| Tekt1     | 8.255639 | 9.913895 | 10.32857 | 10.12123 | 1.658256 | 2.072929 | 1 |
| Pphln1    | 4.703529 | 6.362645 | 8.160186 | 7.261415 | 1.659116 | 3.456657 | 1 |
| Adam5     | 3.164334 | 4.830475 | 5.370719 | 5.100597 | 1.666141 | 2.206385 | 1 |
| BC100451  | 4.84865  | 6.517768 | 7.739465 | 7.128617 | 1.669118 | 2.890815 | 1 |
| Cntf      | 8.878162 | 10.5634  | 10.99291 | 10.77816 | 1.685241 | 2.114747 | 1 |
| Ncoa3     | 3.551123 | 5.243826 | 5.94584  | 5.594833 | 1.692704 | 2.394718 | 1 |
| Abcc12    | 5.680413 | 7.380205 | 7.707277 | 7.543741 | 1.699792 | 2.026864 | 1 |
| Col6a3    | 7.920448 | 9.622841 | 10.38062 | 10.00173 | 1.702393 | 2.46017  | 1 |
| Gm9999    | 5.377574 | 7.084828 | 8.303982 | 7.694405 | 1.707254 | 2.926408 | 1 |

|           |          |          |          |          |          |          |   |
|-----------|----------|----------|----------|----------|----------|----------|---|
| Gm6583    | 2.736777 | 4.451314 | 4.836891 | 4.644103 | 1.714538 | 2.100114 | 1 |
| 1700012BC | 6.030972 | 7.750427 | 8.369517 | 8.059972 | 1.719455 | 2.338545 | 1 |
| Slamf6    | 4.953043 | 6.678981 | 7.586899 | 7.13294  | 1.725938 | 2.633856 | 1 |
| Fabp7     | 13.79919 | 15.53293 | 16.31449 | 15.92371 | 1.73374  | 2.515296 | 1 |
| Xkr5      | 3.678413 | 5.423292 | 5.730259 | 5.576775 | 1.744879 | 2.051846 | 1 |
| Gm9999    | 5.7854   | 7.532177 | 8.716869 | 8.124523 | 1.746777 | 2.931469 | 1 |
| Olfr129   | 2.338026 | 4.092355 | 7.542317 | 5.817336 | 1.75433  | 5.204292 | 1 |
| Gm2030    | 7.61128  | 9.370581 | 9.624619 | 9.4976   | 1.759302 | 2.01334  | 1 |
| Klk7      | 2.321946 | 4.09547  | 4.482945 | 4.289207 | 1.773523 | 2.160998 | 1 |
| Gal       | 9.49634  | 11.27256 | 12.31742 | 11.79499 | 1.776217 | 2.821079 | 1 |
| Spef2     | 6.660232 | 8.440767 | 9.008365 | 8.724566 | 1.780535 | 2.348133 | 1 |
| Mc2r      | 2.321946 | 4.106315 | 4.382009 | 4.244162 | 1.784369 | 2.060063 | 1 |
| Xlr4a     | 4.597158 | 6.384482 | 6.94804  | 6.666261 | 1.787325 | 2.350882 | 1 |
| Hvcn1     | 11.23469 | 13.03006 | 13.50033 | 13.26519 | 1.79537  | 2.265648 | 1 |
| Ifi203    | 9.973924 | 11.77062 | 12.88464 | 12.32763 | 1.796698 | 2.910717 | 1 |
| Padi4     | 2.321946 | 4.12026  | 5.447091 | 4.783675 | 1.798314 | 3.125145 | 1 |
| Lox       | 2.926674 | 4.727584 | 5.068178 | 4.897881 | 1.80091  | 2.141504 | 1 |
| Fgfr4     | 5.309908 | 7.112151 | 8.093804 | 7.602978 | 1.802243 | 2.783896 | 1 |
| Acot1     | 12.03135 | 13.83438 | 14.3629  | 14.09864 | 1.803038 | 2.331557 | 1 |
| Cenpb     | 2.321946 | 4.125388 | 4.608816 | 4.367102 | 1.803442 | 2.28687  | 1 |
| Slc6a19   | 3.039096 | 4.850306 | 5.88332  | 5.366813 | 1.811209 | 2.844224 | 1 |
|           | 6.579721 | 8.395421 | 8.663505 | 8.529463 | 1.815701 | 2.083785 | 1 |
|           | 5.963482 | 7.788476 | 8.131186 | 7.959831 | 1.824994 | 2.167704 | 1 |
| Spib      | 4.791347 | 6.621879 | 7.409773 | 7.015826 | 1.830532 | 2.618426 | 1 |
| Slc44a3   | 2.886442 | 4.729954 | 5.324302 | 5.027128 | 1.843512 | 2.43786  | 1 |
| Olfr470   | 2.321946 | 4.169337 | 5.084404 | 4.626871 | 1.847391 | 2.762458 | 1 |
| Igsf1     | 8.54567  | 10.39539 | 11.28919 | 10.84229 | 1.849724 | 2.743519 | 1 |
| Arhgef7   | 2.321946 | 4.173112 | 4.625106 | 4.399109 | 1.851166 | 2.30316  | 1 |
| Slx       | 7.347657 | 9.199438 | 9.419713 | 9.309576 | 1.851781 | 2.072056 | 1 |
| D2Bwg088l | 4.092628 | 5.945187 | 6.986622 | 6.465904 | 1.852559 | 2.893995 | 1 |
| Isl2      | 3.359152 | 5.228818 | 7.750792 | 6.489805 | 1.869666 | 4.391639 | 1 |
| Defa2     | 3.96018  | 5.838889 | 7.769236 | 6.804062 | 1.878709 | 3.809056 | 1 |
| Arhgap11a | 6.713855 | 8.596176 | 8.992705 | 8.794441 | 1.882321 | 2.27885  | 1 |
| Lct       | 9.200446 | 11.08689 | 11.88545 | 11.48617 | 1.886445 | 2.685006 | 1 |
| AF251705  | 10.56827 | 12.45877 | 12.95331 | 12.70604 | 1.890495 | 2.385038 | 1 |
| Fam115c   | 2.321946 | 4.217312 | 4.791788 | 4.50455  | 1.895366 | 2.469842 | 1 |
| C430049E0 | 3.956571 | 5.854636 | 6.499894 | 6.177265 | 1.898065 | 2.543323 | 1 |
|           | 3.911588 | 5.810122 | 7.586537 | 6.698329 | 1.898533 | 3.674949 | 1 |
| Aldh1l2   | 6.591585 | 8.492399 | 8.848221 | 8.67031  | 1.900814 | 2.256636 | 1 |
| Ak9       | 2.321946 | 4.223495 | 4.942007 | 4.582751 | 1.901549 | 2.620061 | 1 |
|           | 2.563447 | 4.467802 | 4.672826 | 4.570314 | 1.904355 | 2.109379 | 1 |
| Timp2     | 9.352732 | 11.25721 | 11.44958 | 11.35339 | 1.904475 | 2.096847 | 1 |
| Abhd15    | 5.366698 | 7.271276 | 7.498005 | 7.38464  | 1.904577 | 2.131307 | 1 |
| Gm5532    | 5.065725 | 6.972545 | 7.758968 | 7.365756 | 1.906819 | 2.693243 | 1 |
| 4930444A1 | 2.502065 | 4.416513 | 5.339158 | 4.877835 | 1.914448 | 2.837092 | 1 |
| Ern1      | 2.934839 | 4.852862 | 5.137224 | 4.995043 | 1.918024 | 2.202386 | 1 |
| Sdcbp     | 3.084511 | 5.006836 | 5.169411 | 5.088124 | 1.922325 | 2.0849   | 1 |

|           |          |          |          |          |          |          |   |
|-----------|----------|----------|----------|----------|----------|----------|---|
| Apoc1     | 9.914884 | 11.83879 | 13.8385  | 12.83865 | 1.923906 | 3.923617 | 1 |
| BC002189  | 2.321946 | 4.257721 | 5.065828 | 4.661775 | 1.935775 | 2.743882 | 1 |
| Prg4      | 9.426436 | 11.36611 | 11.60317 | 11.48464 | 1.939672 | 2.176733 | 1 |
| Ly6g6e    | 7.047331 | 8.988481 | 10.36346 | 9.67597  | 1.94115  | 3.316127 | 1 |
| H2-Q5     | 5.532968 | 7.475016 | 7.946148 | 7.710582 | 1.942048 | 2.413181 | 1 |
| Syk       | 9.118348 | 11.06409 | 11.1344  | 11.09924 | 1.945739 | 2.016047 | 1 |
| 4930473AC | 3.487815 | 5.434275 | 5.806652 | 5.620463 | 1.94646  | 2.318837 | 1 |
| C330027CC | 2.755529 | 4.7053   | 4.876847 | 4.791074 | 1.949771 | 2.121319 | 1 |
| Xlr4b     | 5.509173 | 7.460362 | 7.698648 | 7.579505 | 1.951189 | 2.189474 | 1 |
| Sytl3     | 2.321946 | 4.275218 | 6.091281 | 5.18325  | 1.953272 | 3.769335 | 1 |
| Sp140     | 8.502828 | 10.46631 | 10.53483 | 10.50057 | 1.96348  | 2.031998 | 1 |
| Stard5    | 7.148088 | 9.115392 | 9.177345 | 9.146369 | 1.967304 | 2.029257 | 1 |
| Pdlim4    | 12.03853 | 14.00775 | 14.14837 | 14.07806 | 1.969212 | 2.109835 | 1 |
| Ctsh      | 12.28877 | 14.25992 | 14.62555 | 14.44273 | 1.971146 | 2.336773 | 1 |
| Nek5      | 5.09447  | 7.065826 | 7.629617 | 7.347721 | 1.971356 | 2.535147 | 1 |
| Tctex1d4  | 5.056573 | 7.028875 | 7.603989 | 7.316432 | 1.972302 | 2.547416 | 1 |
| Plscr4    | 2.796711 | 4.773157 | 4.925176 | 4.849166 | 1.976445 | 2.128465 | 1 |
| Gcnt1     | 6.26461  | 8.243646 | 8.380602 | 8.312124 | 1.979036 | 2.115992 | 1 |
|           | 2.509133 | 4.48939  | 6.512492 | 5.500941 | 1.980257 | 4.003358 | 1 |
| Tfap2b    | 6.671398 | 8.652009 | 9.075574 | 8.863792 | 1.980611 | 2.404176 | 1 |
|           | 2.321946 | 4.31013  | 7.213739 | 5.761935 | 1.988184 | 4.891793 | 1 |
| Kif18a    | 7.00184  | 8.993337 | 9.178513 | 9.085925 | 1.991497 | 2.176673 | 1 |
| Ifi203    | 6.432272 | 8.425278 | 8.771694 | 8.598486 | 1.993007 | 2.339423 | 1 |
| Hk2       | 9.382324 | 11.37728 | 11.62966 | 11.50347 | 1.994952 | 2.247332 | 1 |
| Trim47    | 10.46676 | 12.46726 | 11.7921  | 12.12968 | 2.000504 | 1.325349 | 1 |
| Ccny      | 3.887204 | 5.888486 | 5.456046 | 5.672266 | 2.001282 | 1.568841 | 1 |
| Arg2      | 4.630534 | 6.632904 | 5.928845 | 6.280875 | 2.00237  | 1.298311 | 1 |
| Smarcd2   | 6.519554 | 8.523167 | 7.142792 | 7.83298  | 2.003613 | 0.623238 | 1 |
| Slc38a9   | 2.617345 | 4.623472 | 4.721054 | 4.672263 | 2.006127 | 2.103709 | 2 |
| Gm1966    | 2.321946 | 4.328137 | 6.265246 | 5.296692 | 2.006191 | 3.9433   | 2 |
| Sash3     | 7.649609 | 9.656807 | 9.732529 | 9.694668 | 2.007198 | 2.08292  | 2 |
| Gabrg3    | 4.598218 | 6.605841 | 4.550907 | 5.578374 | 2.007623 | -0.04731 | 1 |
| Dao       | 2.518221 | 4.525851 | 5.869021 | 5.197436 | 2.00763  | 3.3508   | 2 |
|           | 3.498294 | 5.507897 | 5.976654 | 5.742276 | 2.009604 | 2.47836  | 2 |
|           | 2.321946 | 4.332202 | 4.626864 | 4.479533 | 2.010256 | 2.304918 | 2 |
| Ifitm2    | 9.156313 | 11.16738 | 9.992406 | 10.57989 | 2.011069 | 0.836093 | 1 |
| Tpm4      | 12.56068 | 14.57332 | 13.97256 | 14.27294 | 2.012636 | 1.411873 | 1 |
| Fas       | 9.050982 | 11.06489 | 10.46572 | 10.76531 | 2.013911 | 1.414738 | 1 |
| Pilra     | 6.364838 | 8.378832 | 8.366183 | 8.372508 | 2.013994 | 2.001345 | 2 |
| Angpt2    | 8.286618 | 10.30168 | 9.744507 | 10.0231  | 2.015065 | 1.457889 | 1 |
| Hmgn1     | 8.58987  | 10.60624 | 9.853169 | 10.2297  | 2.016366 | 1.263299 | 1 |
| Slc16a9   | 6.007817 | 8.024307 | 7.639761 | 7.832034 | 2.01649  | 1.631944 | 1 |
| Frem3     | 2.84332  | 4.861451 | 6.563476 | 5.712463 | 2.018131 | 3.720156 | 2 |
| AA060545  | 3.117645 | 5.135893 | 4.445108 | 4.790501 | 2.018249 | 1.327464 | 1 |
| Gm694     | 8.559145 | 10.57945 | 8.972988 | 9.77622  | 2.020307 | 0.413843 | 1 |
| Cdkn3     | 5.449521 | 7.470517 | 7.255725 | 7.363121 | 2.020996 | 1.806205 | 1 |
| Mapk1     | 8.951641 | 10.97275 | 10.50298 | 10.73787 | 2.021113 | 1.551337 | 1 |



|           |          |          |          |          |          |          |   |
|-----------|----------|----------|----------|----------|----------|----------|---|
| Mndal     | 9.0688   | 11.08996 | 10.62704 | 10.8585  | 2.021164 | 1.558238 | 1 |
| Samhd1    | 7.244859 | 9.266643 | 8.345174 | 8.805909 | 2.021784 | 1.100315 | 1 |
|           | 9.651623 | 11.6738  | 11.07388 | 11.37384 | 2.022179 | 1.422256 | 1 |
| Coro1c    | 10.8115  | 12.83408 | 12.50785 | 12.67096 | 2.022572 | 1.696342 | 1 |
| Nfam1     | 8.840572 | 10.86385 | 10.82172 | 10.84278 | 2.023274 | 1.98115  | 1 |
| Cpne4     | 5.026846 | 7.050201 | 3.578843 | 5.314522 | 2.023355 | -1.448   | 1 |
| Fes       | 7.870246 | 9.893864 | 9.343983 | 9.618924 | 2.023618 | 1.473737 | 1 |
| Fanca     | 7.88323  | 9.908941 | 9.180852 | 9.544897 | 2.025711 | 1.297622 | 1 |
| 473141910 | 2.321946 | 4.348971 | 4.745057 | 4.547014 | 2.027025 | 2.423111 | 2 |
| Tes       | 8.523167 | 10.5503  | 10.32421 | 10.43725 | 2.027132 | 1.801039 | 1 |
|           | 2.835643 | 4.863813 | 4.639445 | 4.751629 | 2.02817  | 1.803802 | 1 |
|           | 6.210781 | 8.23897  | 7.169151 | 7.704061 | 2.028189 | 0.95837  | 1 |
|           | 4.187272 | 6.215604 | 6.092654 | 6.154129 | 2.028332 | 1.905382 | 1 |
| Naip6     | 6.908725 | 8.937114 | 9.067388 | 9.002251 | 2.028389 | 2.158663 | 2 |
| Cysltr1   | 6.278115 | 8.307005 | 8.155024 | 8.231015 | 2.02889  | 1.876909 | 1 |
| Matn2     | 9.680894 | 11.71083 | 11.5197  | 11.61526 | 2.029932 | 1.838803 | 1 |
| Bms1      | 5.551006 | 7.581171 | 6.453411 | 7.017291 | 2.030165 | 0.902405 | 1 |
| Igfbp2    | 12.07904 | 14.10944 | 13.10448 | 13.60696 | 2.030401 | 1.025446 | 1 |
| Vpreb1    | 5.323072 | 7.356253 | 5.414117 | 6.385185 | 2.033181 | 0.091045 | 1 |
| Ncapg     | 4.618376 | 6.651813 | 6.58049  | 6.616152 | 2.033437 | 1.962114 | 1 |
| Hspb1     | 12.75942 | 14.79484 | 14.00882 | 14.40183 | 2.03542  | 1.249404 | 1 |
| Tec       | 5.46278  | 7.498633 | 7.135967 | 7.3173   | 2.035853 | 1.673187 | 1 |
| Ifi47     | 8.677661 | 10.7158  | 10.3206  | 10.5182  | 2.038137 | 1.64294  | 1 |
| Odc1      | 8.130099 | 10.16833 | 9.041759 | 9.605045 | 2.038231 | 0.91166  | 1 |
| Itgb2     | 8.637739 | 10.67811 | 10.54082 | 10.60947 | 2.040372 | 1.903084 | 1 |
| AW551984  | 4.119049 | 6.159853 | 6.266193 | 6.213023 | 2.040804 | 2.147144 | 2 |
|           | 7.866969 | 9.910265 | 9.209871 | 9.560068 | 2.043296 | 1.342902 | 1 |
| Dhx58     | 8.989239 | 11.03349 | 10.5649  | 10.7992  | 2.044254 | 1.575661 | 1 |
| Lox       | 5.091608 | 7.135967 | 8.099276 | 7.617622 | 2.044359 | 3.007668 | 2 |
| Rrbp1     | 10.22424 | 12.26872 | 11.51328 | 11.891   | 2.044482 | 1.289036 | 1 |
| Fes       | 10.22691 | 12.2727  | 12.00591 | 12.1393  | 2.045792 | 1.778995 | 1 |
| Fam117a   | 4.193204 | 6.240464 | 5.221323 | 5.730893 | 2.04726  | 1.028119 | 1 |
| Hcst      | 6.871121 | 8.919567 | 9.364829 | 9.142198 | 2.048447 | 2.493709 | 2 |
| Ces2c     | 6.596196 | 8.644822 | 6.871862 | 7.758342 | 2.048626 | 0.275666 | 1 |
| Col1a1    | 12.69044 | 14.74123 | 14.75915 | 14.75019 | 2.050786 | 2.068712 | 2 |
|           | 5.185566 | 7.237082 | 4.348349 | 5.792715 | 2.051516 | -0.83722 | 1 |
| Dnali1    | 6.791984 | 8.843758 | 9.350287 | 9.097022 | 2.051774 | 2.558303 | 2 |
| Fads2     | 4.908751 | 6.960826 | 5.267725 | 6.114275 | 2.052075 | 0.358974 | 1 |
| Retnlg    | 4.502197 | 6.554934 | 7.11477  | 6.834852 | 2.052737 | 2.612573 | 2 |
| Trp73     | 4.994054 | 7.04909  | 7.353238 | 7.201164 | 2.055036 | 2.359184 | 2 |
| Rhoc      | 11.615   | 13.67194 | 13.23945 | 13.4557  | 2.056939 | 1.624456 | 1 |
|           | 5.207025 | 7.265741 | 5.175583 | 6.220662 | 2.058716 | -0.03144 | 1 |
| Gm20558   | 4.486796 | 6.545672 | 5.768286 | 6.156979 | 2.058876 | 1.281489 | 1 |
| Olfr1445  | 2.321946 | 4.380967 | 3.884299 | 4.132633 | 2.059021 | 1.562353 | 1 |
| Mcm10     | 8.240785 | 10.30156 | 9.655646 | 9.978602 | 2.060772 | 1.414861 | 1 |
| Ankle1    | 7.917837 | 9.981475 | 9.85458  | 9.918028 | 2.063638 | 1.936743 | 1 |
| Egflam    | 3.075118 | 5.138929 | 4.445962 | 4.792445 | 2.063811 | 1.370844 | 1 |

|          |          |          |          |          |          |          |   |
|----------|----------|----------|----------|----------|----------|----------|---|
| Chaf1a   | 6.15842  | 8.222487 | 7.469106 | 7.845797 | 2.064067 | 1.310686 | 1 |
| Gm4130   | 10.36197 | 12.42667 | 11.50637 | 11.96652 | 2.064696 | 1.144398 | 1 |
|          | 2.321946 | 4.386711 | 5.451178 | 4.918945 | 2.064765 | 3.129232 | 2 |
| Smad5    | 4.173112 | 6.238807 | 5.747981 | 5.993394 | 2.065695 | 1.574868 | 1 |
| Cebpe    | 3.868652 | 5.934962 | 5.291595 | 5.613279 | 2.06631  | 1.422943 | 1 |
| Pkn3     | 8.315232 | 10.38234 | 9.397624 | 9.889982 | 2.067108 | 1.082392 | 1 |
| Siglec5  | 2.769909 | 4.83704  | 4.047535 | 4.442287 | 2.06713  | 1.277626 | 1 |
| Mbtps2   | 4.877069 | 6.946149 | 6.353354 | 6.649751 | 2.069081 | 1.476285 | 1 |
| Reep4    | 5.915536 | 7.984666 | 6.742464 | 7.363565 | 2.06913  | 0.826928 | 1 |
| Wasf3    | 2.910671 | 4.980437 | 4.376282 | 4.67836  | 2.069766 | 1.465611 | 1 |
|          | 8.976194 | 11.04647 | 10.17836 | 10.61241 | 2.070275 | 1.202162 | 1 |
| Myd88    | 8.105883 | 10.17646 | 9.304246 | 9.740351 | 2.070572 | 1.198363 | 1 |
| Ddx58    | 6.154689 | 8.226997 | 7.323312 | 7.775155 | 2.072308 | 1.168623 | 1 |
| Aif1     | 12.08074 | 14.15336 | 14.51215 | 14.33275 | 2.072612 | 2.431403 | 2 |
| Pole3    | 5.60549  | 7.678952 | 6.746419 | 7.212685 | 2.073462 | 1.140929 | 1 |
| Ptplad2  | 7.461856 | 9.535489 | 9.243579 | 9.389534 | 2.073633 | 1.781723 | 1 |
| A430104N | 6.928605 | 9.002314 | 9.077458 | 9.039886 | 2.073709 | 2.148853 | 2 |
| Tmem110  | 2.93733  | 5.011073 | 4.134168 | 4.572621 | 2.073743 | 1.196838 | 1 |
|          | 8.577885 | 10.65211 | 10.12972 | 10.39092 | 2.074226 | 1.551835 | 1 |
| Sbno2    | 6.219673 | 8.293985 | 6.598329 | 7.446157 | 2.074312 | 0.378656 | 1 |
|          | 11.48231 | 13.55727 | 12.65069 | 13.10398 | 2.074963 | 1.168386 | 1 |
| H2-T24   | 4.433585 | 6.509744 | 5.573839 | 6.041792 | 2.076159 | 1.140254 | 1 |
| H2-D1    | 10.47289 | 12.55122 | 11.87791 | 12.21456 | 2.078329 | 1.405019 | 1 |
| Trem12   | 5.256221 | 7.33649  | 9.332334 | 8.334412 | 2.080268 | 4.076113 | 2 |
| Kdelr3   | 3.074261 | 5.155276 | 4.973445 | 5.064361 | 2.081015 | 1.899184 | 1 |
| Ddx21    | 9.916487 | 11.99752 | 11.20673 | 11.60212 | 2.081031 | 1.290238 | 1 |
|          | 13.00245 | 15.08433 | 14.44721 | 14.76577 | 2.081871 | 1.444759 | 1 |
| Cdv3     | 4.571944 | 6.656686 | 3.984677 | 5.320682 | 2.084743 | -0.58727 | 1 |
| Fhad1    | 6.331468 | 8.418144 | 7.556186 | 7.987165 | 2.086676 | 1.224718 | 1 |
| Rnh1     | 7.726145 | 9.813137 | 8.944942 | 9.379039 | 2.086992 | 1.218797 | 1 |
| Ptbp3    | 3.276605 | 5.364335 | 4.803676 | 5.084005 | 2.08773  | 1.527071 | 1 |
| Gxylt1   | 5.567947 | 7.65575  | 7.152089 | 7.403919 | 2.087803 | 1.584142 | 1 |
| Tnfsf18  | 2.917483 | 5.00591  | 4.864875 | 4.935393 | 2.088428 | 1.947392 | 1 |
| Ttf2     | 8.596388 | 10.68489 | 10.65428 | 10.66959 | 2.088505 | 2.057889 | 2 |
| Fam60a   | 2.948587 | 5.037418 | 5.187482 | 5.11245  | 2.088831 | 2.238895 | 2 |
| Lgals3bp | 10.08377 | 12.17283 | 12.15399 | 12.16341 | 2.08906  | 2.070213 | 2 |
| Phox2a   | 5.925524 | 8.015073 | 7.029421 | 7.522247 | 2.089549 | 1.103897 | 1 |
| Cacng5   | 8.822586 | 10.91431 | 10.16929 | 10.5418  | 2.091726 | 1.3467   | 1 |
|          | 2.41969  | 4.515797 | 6.2635   | 5.389648 | 2.096107 | 3.84381  | 2 |
|          | 5.910023 | 8.008473 | 7.86947  | 7.938972 | 2.09845  | 1.959447 | 1 |
| Aim2     | 6.902679 | 9.001559 | 8.704069 | 8.852814 | 2.09888  | 1.80139  | 1 |
| Cklf     | 7.601    | 9.700274 | 9.221619 | 9.460946 | 2.099273 | 1.620619 | 1 |
| Ftl1     | 12.03525 | 14.1352  | 13.19617 | 13.66568 | 2.099958 | 1.160921 | 1 |
| Cd53     | 6.943098 | 9.043198 | 8.529492 | 8.786345 | 2.1001   | 1.586394 | 1 |
| Slamf9   | 8.281464 | 10.38353 | 10.85664 | 10.62009 | 2.102067 | 2.575179 | 2 |
| Foxj1    | 6.103683 | 8.206942 | 7.855117 | 8.03103  | 2.103259 | 1.751434 | 1 |
| Pde3a    | 4.31768  | 6.421367 | 6.040897 | 6.231132 | 2.103687 | 1.723217 | 1 |

|           |          |          |          |          |          |          |   |
|-----------|----------|----------|----------|----------|----------|----------|---|
| Nras      | 7.824952 | 9.92914  | 9.390717 | 9.659929 | 2.104188 | 1.565765 | 1 |
| Ucma      | 7.069772 | 9.174891 | 9.229486 | 9.202188 | 2.105119 | 2.159714 | 2 |
| Gm5431    | 3.319868 | 5.427694 | 5.499731 | 5.463712 | 2.107826 | 2.179863 | 2 |
| Umodl1    | 5.290565 | 7.398566 | 8.618563 | 8.008565 | 2.108001 | 3.327998 | 2 |
| Trem2     | 13.00827 | 15.11731 | 15.37591 | 15.24661 | 2.10904  | 2.367636 | 2 |
| Eif2s3x   | 6.772658 | 8.881736 | 8.668887 | 8.775312 | 2.109078 | 1.896229 | 1 |
| Esyt1     | 7.134085 | 9.243778 | 8.226468 | 8.735123 | 2.109693 | 1.092383 | 1 |
| Bcl6b     | 4.657156 | 6.767433 | 5.860587 | 6.31401  | 2.110277 | 1.203432 | 1 |
|           | 2.367052 | 4.478003 | 4.932948 | 4.705475 | 2.11095  | 2.565896 | 2 |
| Vps13c    | 5.876171 | 7.987516 | 7.474677 | 7.731097 | 2.111345 | 1.598506 | 1 |
| Tm4sf1    | 10.85842 | 12.97011 | 11.771   | 12.37055 | 2.111689 | 0.912582 | 1 |
| Spidr     | 9.398534 | 11.51039 | 11.09969 | 11.30504 | 2.111855 | 1.701156 | 1 |
| Ptgdr     | 6.328125 | 8.440548 | 8.011689 | 8.226119 | 2.112423 | 1.683564 | 1 |
| Rnase12   | 2.418375 | 4.532571 | 4.679627 | 4.606099 | 2.114197 | 2.261252 | 2 |
| Sec14l3   | 6.69711  | 8.811917 | 8.270844 | 8.54138  | 2.114807 | 1.573734 | 1 |
| Irf8      | 9.931069 | 12.04601 | 11.99876 | 12.02238 | 2.114942 | 2.067686 | 2 |
| Oit3      | 5.1702   | 7.285638 | 7.375658 | 7.330648 | 2.115438 | 2.205458 | 2 |
| Prkcd     | 7.002016 | 9.118005 | 9.230882 | 9.174444 | 2.115989 | 2.228866 | 2 |
| Ticrr     | 2.388369 | 4.505857 | 4.064113 | 4.284985 | 2.117488 | 1.675744 | 1 |
| Mdfic     | 10.83582 | 12.95398 | 12.80329 | 12.87863 | 2.118167 | 1.967469 | 1 |
| Fcgr1     | 9.38859  | 11.50689 | 11.14584 | 11.32637 | 2.118302 | 1.757248 | 1 |
| Pbxip1    | 7.099205 | 9.219296 | 8.567413 | 8.893354 | 2.120091 | 1.468209 | 1 |
| Micall2   | 6.381539 | 8.501908 | 8.046653 | 8.274281 | 2.120369 | 1.665114 | 1 |
| Dcn       | 11.02578 | 13.14671 | 12.42058 | 12.78365 | 2.12093  | 1.394794 | 1 |
| Zc3hav1   | 9.522018 | 11.64315 | 11.24704 | 11.4451  | 2.121131 | 1.725026 | 1 |
| Itgb7     | 6.810253 | 8.931975 | 8.393457 | 8.662716 | 2.121722 | 1.583204 | 1 |
| AA536887  | 4.631075 | 6.75483  | 6.843552 | 6.799191 | 2.123755 | 2.212476 | 2 |
|           | 5.220116 | 7.347657 | 5.085677 | 6.216667 | 2.127541 | -0.13444 | 1 |
| Mtr       | 3.318481 | 5.446454 | 6.645726 | 6.04609  | 2.127972 | 3.327245 | 2 |
| Cd24a     | 9.147909 | 11.2761  | 11.03645 | 11.15627 | 2.12819  | 1.888541 | 1 |
| Pou4f1    | 6.896281 | 9.027492 | 10.98953 | 10.00851 | 2.131211 | 4.093245 | 2 |
| Rnu3b1    | 7.561595 | 9.692984 | 8.714945 | 9.203965 | 2.131389 | 1.15335  | 1 |
| Ceacam12  | 5.282572 | 7.414267 | 5.631737 | 6.523002 | 2.131695 | 0.349165 | 1 |
| Ncf1      | 8.415073 | 10.54744 | 10.57197 | 10.5597  | 2.13237  | 2.156892 | 2 |
| Ehd4      | 8.204058 | 10.33667 | 9.822352 | 10.07951 | 2.132608 | 1.618294 | 1 |
| Adamts1   | 7.303875 | 9.436546 | 8.051157 | 8.743852 | 2.132671 | 0.747282 | 1 |
| Ipo7      | 3.819592 | 5.95271  | 5.469111 | 5.710911 | 2.133119 | 1.64952  | 1 |
| Rab23     | 4.634863 | 6.768006 | 4.981096 | 5.874551 | 2.133143 | 0.346233 | 1 |
| Cav1      | 3.416863 | 5.550086 | 5.533192 | 5.541639 | 2.133222 | 2.116329 | 2 |
| 9030405F2 | 5.2845   | 7.418364 | 3.458829 | 5.438596 | 2.133864 | -1.82567 | 1 |
| Lss       | 4.900962 | 7.036226 | 5.625711 | 6.330969 | 2.135264 | 0.724749 | 1 |
| Kifc1     | 6.114367 | 8.252243 | 7.567076 | 7.90966  | 2.137877 | 1.45271  | 1 |
|           | 7.778073 | 9.917188 | 9.988709 | 9.952949 | 2.139115 | 2.210636 | 2 |
| Cep72     | 2.321946 | 4.461382 | 4.262284 | 4.361833 | 2.139436 | 1.940338 | 1 |
| C130033p1 | 2.890355 | 5.030813 | 7.80003  | 6.415422 | 2.140458 | 4.909675 | 2 |
| C130026I2 | 4.56265  | 6.703237 | 7.117288 | 6.910262 | 2.140587 | 2.554638 | 2 |
| Hfe       | 9.014244 | 11.15559 | 11.3601  | 11.25784 | 2.141341 | 2.345857 | 2 |

|           |          |          |          |          |          |          |   |
|-----------|----------|----------|----------|----------|----------|----------|---|
| Csf1      | 10.00032 | 12.1436  | 11.28248 | 11.71304 | 2.143279 | 1.282159 | 1 |
| Txnip     | 5.579288 | 7.72266  | 6.863129 | 7.292895 | 2.143372 | 1.283841 | 1 |
| Pole      | 8.859538 | 11.00393 | 10.84297 | 10.92345 | 2.144394 | 1.983432 | 1 |
| Homer3    | 4.553366 | 6.698617 | 4.84577  | 5.772194 | 2.145251 | 0.292404 | 1 |
| Trim38    | 4.725547 | 6.871373 | 6.38804  | 6.629706 | 2.145826 | 1.662493 | 1 |
| Dhrs4     | 4.42505  | 6.570952 | 6.093386 | 6.332169 | 2.145902 | 1.668336 | 1 |
| 9130209AC | 3.144809 | 5.290907 | 5.523471 | 5.407189 | 2.146099 | 2.378663 | 2 |
| Ctla2a    | 12.62879 | 14.77495 | 14.79902 | 14.78699 | 2.146159 | 2.170233 | 2 |
| Pla2g4a   | 10.4049  | 12.55113 | 11.99225 | 12.27169 | 2.146228 | 1.587347 | 1 |
| Calu      | 7.957366 | 10.10483 | 8.976194 | 9.540514 | 2.147469 | 1.018829 | 1 |
| Tmpo      | 5.879129 | 8.027189 | 7.357649 | 7.692419 | 2.148061 | 1.478521 | 1 |
| Vmn2r18   | 4.2277   | 6.376967 | 5.291464 | 5.834216 | 2.149267 | 1.063764 | 1 |
|           | 8.553339 | 10.70262 | 10.15917 | 10.4309  | 2.14928  | 1.605835 | 1 |
| Rasd1     | 4.527    | 6.676993 | 5.536244 | 6.106619 | 2.149994 | 1.009245 | 1 |
| Trim14    | 5.606591 | 7.758546 | 7.169379 | 7.463963 | 2.151956 | 1.562788 | 1 |
|           | 9.941111 | 12.09329 | 11.17442 | 11.63386 | 2.152181 | 1.233312 | 1 |
| Ptbp3     | 8.044655 | 10.19826 | 9.837017 | 10.01764 | 2.153608 | 1.792362 | 1 |
| Arpc3     | 11.68232 | 13.8361  | 12.75293 | 13.29452 | 2.153775 | 1.070612 | 1 |
|           | 4.474494 | 6.628748 | 6.589989 | 6.609369 | 2.154254 | 2.115495 | 2 |
| Sppl2a    | 4.241064 | 6.398109 | 5.429289 | 5.913699 | 2.157045 | 1.188225 | 1 |
| Stt3a     | 4.177577 | 6.3407   | 5.513495 | 5.927097 | 2.163123 | 1.335919 | 1 |
| Murc      | 4.572571 | 6.735711 | 6.012984 | 6.374347 | 2.163139 | 1.440413 | 1 |
| Cp        | 6.183477 | 8.347342 | 7.881298 | 8.11432  | 2.163865 | 1.697821 | 1 |
| Cntf      | 9.039247 | 11.20365 | 11.45009 | 11.32687 | 2.164399 | 2.410847 | 2 |
| Has2      | 6.788754 | 8.95328  | 9.605242 | 9.279261 | 2.164526 | 2.816489 | 2 |
| Akr1c13   | 6.054217 | 8.218948 | 8.289351 | 8.254149 | 2.164731 | 2.235133 | 2 |
| Hvcn1     | 10.17836 | 12.34349 | 12.89041 | 12.61695 | 2.165133 | 2.712053 | 2 |
| Gfap      | 4.465427 | 6.633919 | 5.453597 | 6.043758 | 2.168492 | 0.98817  | 1 |
| Dsp       | 6.884836 | 9.053345 | 9.968744 | 9.511045 | 2.168509 | 3.083908 | 2 |
|           | 13.99539 | 16.16468 | 15.68396 | 15.92432 | 2.169289 | 1.688571 | 1 |
| Npy2r     | 7.335622 | 9.505998 | 10.15119 | 9.828594 | 2.170376 | 2.815567 | 2 |
| Klf13     | 2.321946 | 4.493179 | 4.248658 | 4.370919 | 2.171233 | 1.926712 | 1 |
| Olfr115   | 4.359532 | 6.530917 | 5.331516 | 5.931217 | 2.171385 | 0.971984 | 1 |
|           | 12.24851 | 14.42362 | 13.77927 | 14.10145 | 2.175112 | 1.53076  | 1 |
| Ncf2      | 10.51497 | 12.69165 | 12.69745 | 12.69455 | 2.176683 | 2.182483 | 2 |
| Serp1     | 9.441923 | 11.61895 | 11.29934 | 11.45914 | 2.17703  | 1.857412 | 1 |
|           | 13.4829  | 15.66051 | 15.16426 | 15.41239 | 2.177615 | 1.681369 | 1 |
| Olfr1496  | 2.321946 | 4.500214 | 4.343349 | 4.421782 | 2.178268 | 2.021403 | 2 |
| Kcnj13    | 8.755717 | 10.93482 | 9.823517 | 10.37917 | 2.179106 | 1.0678   | 1 |
| Grrp1     | 9.862238 | 12.042   | 11.09269 | 11.56734 | 2.179757 | 1.23045  | 1 |
| Slc16a6   | 2.92415  | 5.105204 | 5.066134 | 5.085669 | 2.181054 | 2.141983 | 2 |
| Nrp2      | 10.98971 | 13.17112 | 13.11376 | 13.14244 | 2.181418 | 2.124052 | 2 |
| Trim47    | 10.05724 | 12.24219 | 11.39972 | 11.82095 | 2.184949 | 1.342479 | 1 |
| Ddx58     | 9.310118 | 11.49581 | 11.14145 | 11.31863 | 2.185693 | 1.831335 | 1 |
| Gbp2b     | 7.577568 | 9.765104 | 9.815286 | 9.790195 | 2.187536 | 2.237718 | 2 |
| Nek6      | 10.12196 | 12.3096  | 11.47918 | 11.89439 | 2.187637 | 1.357219 | 1 |
| Lcp2      | 5.133837 | 7.32177  | 7.53604  | 7.428905 | 2.187933 | 2.402203 | 2 |

|           |          |          |          |          |          |          |   |
|-----------|----------|----------|----------|----------|----------|----------|---|
| Col18a1   | 8.598292 | 10.78631 | 10.54045 | 10.66338 | 2.188015 | 1.94216  | 1 |
| Olfr803   | 4.016453 | 6.204731 | 4.206102 | 5.205417 | 2.188278 | 0.189649 | 1 |
|           | 4.398449 | 6.586781 | 4.652848 | 5.619815 | 2.188332 | 0.254399 | 1 |
|           | 13.63692 | 15.82936 | 15.27886 | 15.55411 | 2.192434 | 1.641939 | 1 |
| Mmp13     | 2.321946 | 4.514708 | 5.421634 | 4.968171 | 2.192762 | 3.099688 | 2 |
| Zmynd15   | 7.164534 | 9.357715 | 9.487491 | 9.422603 | 2.193181 | 2.322957 | 2 |
| Gstm2     | 3.867306 | 6.060787 | 4.858003 | 5.459395 | 2.193481 | 0.990697 | 1 |
| Foxm1     | 7.812199 | 10.008   | 9.72105  | 9.864525 | 2.1958   | 1.908851 | 1 |
|           | 12.13291 | 14.3304  | 13.38059 | 13.85549 | 2.197494 | 1.247682 | 1 |
| Gm867     | 5.523    | 7.720568 | 7.387182 | 7.553875 | 2.197568 | 1.864182 | 1 |
| Chst9     | 4.740122 | 6.939579 | 6.643217 | 6.791398 | 2.199456 | 1.903095 | 1 |
| Csf1      | 6.966557 | 9.167309 | 9.004614 | 9.085962 | 2.200752 | 2.038057 | 2 |
| 4930547C1 | 3.858417 | 6.059766 | 4.289034 | 5.1744   | 2.201349 | 0.430617 | 1 |
| Gm8995    | 4.30709  | 6.510145 | 5.158009 | 5.834077 | 2.203055 | 0.850919 | 1 |
| Loxl1     | 6.742837 | 8.946275 | 8.288931 | 8.617603 | 2.203439 | 1.546095 | 1 |
| Dnah12    | 4.685741 | 6.889987 | 4.408897 | 5.649442 | 2.204246 | -0.27684 | 1 |
| Cks1b     | 10.73228 | 12.93774 | 12.45156 | 12.69465 | 2.205461 | 1.719279 | 1 |
| Aox3      | 2.389461 | 4.595016 | 5.071926 | 4.833471 | 2.205554 | 2.682465 | 2 |
| H2-Q10    | 4.32542  | 6.531718 | 5.583721 | 6.05772  | 2.206298 | 1.258301 | 1 |
| Ahnak     | 7.125325 | 9.332136 | 9.91409  | 9.623113 | 2.206811 | 2.788765 | 2 |
| Blnk      | 11.93973 | 14.14704 | 14.04036 | 14.0937  | 2.207313 | 2.100635 | 2 |
|           | 13.98182 | 16.18968 | 15.67975 | 15.93472 | 2.207866 | 1.697934 | 1 |
| Crxos1    | 3.899881 | 6.10953  | 4.89647  | 5.503    | 2.20965  | 0.996589 | 1 |
| Smim5     | 2.321946 | 4.533735 | 4.572571 | 4.553153 | 2.211789 | 2.250625 | 2 |
| Bpifa6    | 4.69048  | 6.904709 | 5.460953 | 6.182831 | 2.214229 | 0.770473 | 1 |
| S1pr3     | 10.05599 | 12.27142 | 11.50302 | 11.88722 | 2.215432 | 1.447029 | 1 |
| Rab38     | 4.584235 | 6.79971  | 7.424606 | 7.112158 | 2.215475 | 2.840372 | 2 |
| Irgm1     | 9.629868 | 11.84595 | 11.34638 | 11.59616 | 2.216078 | 1.716509 | 1 |
| Hmgn2     | 5.559192 | 7.775467 | 6.610375 | 7.192921 | 2.216276 | 1.051183 | 1 |
| Cebpa     | 7.172545 | 9.390866 | 8.756887 | 9.073876 | 2.218321 | 1.584342 | 1 |
| Epb4.2    | 2.344473 | 4.562859 | 7.168274 | 5.865567 | 2.218386 | 4.823801 | 2 |
| Gm11545   | 3.712074 | 5.932944 | 6.23138  | 6.082162 | 2.22087  | 2.519306 | 2 |
|           | 3.543269 | 5.764936 | 4.42505  | 5.094993 | 2.221667 | 0.881781 | 1 |
| Nsl1      | 7.935739 | 10.15856 | 10.33112 | 10.24484 | 2.222825 | 2.39538  | 2 |
|           | 6.218378 | 8.442389 | 6.809628 | 7.626009 | 2.224011 | 0.59125  | 1 |
| Gpr115    | 5.274097 | 7.499185 | 7.651149 | 7.575167 | 2.225088 | 2.377053 | 2 |
| Lrp8      | 4.98183  | 7.209463 | 6.282806 | 6.746135 | 2.227633 | 1.300977 | 1 |
| Cdrt4     | 3.41662  | 5.644267 | 5.227917 | 5.436092 | 2.227647 | 1.811297 | 1 |
| Mab21l1   | 3.870934 | 6.101759 | 5.836467 | 5.969113 | 2.230825 | 1.965533 | 1 |
| Emr1      | 11.68574 | 13.91689 | 14.5153  | 14.21609 | 2.231147 | 2.829556 | 2 |
| Gstcd     | 3.963011 | 6.196633 | 5.708868 | 5.952751 | 2.233622 | 1.745857 | 1 |
| 5430401F1 | 6.405628 | 8.646296 | 6.379469 | 7.512883 | 2.240668 | -0.02616 | 1 |
| Col16a1   | 12.05779 | 14.29942 | 14.13101 | 14.21522 | 2.241633 | 2.073223 | 2 |
| Mapk1ip1l | 5.208137 | 7.451088 | 7.103273 | 7.277181 | 2.242951 | 1.895136 | 1 |
| Gm13272   | 3.701514 | 5.944873 | 6.674461 | 6.309667 | 2.243359 | 2.972947 | 2 |
| Hn1l      | 8.594238 | 10.83788 | 10.56274 | 10.70031 | 2.243646 | 1.968504 | 1 |
| Ces2e     | 4.671021 | 6.916287 | 6.303407 | 6.609847 | 2.245266 | 1.632386 | 1 |

|           |          |          |          |          |          |          |   |
|-----------|----------|----------|----------|----------|----------|----------|---|
|           | 2.321946 | 4.567735 | 4.834453 | 4.701094 | 2.245789 | 2.512507 | 2 |
| Bin2      | 5.314138 | 7.560125 | 5.887453 | 6.723789 | 2.245987 | 0.573314 | 1 |
| 2310011E2 | 2.321946 | 4.569314 | 4.811737 | 4.690526 | 2.247368 | 2.489791 | 2 |
| Spry2     | 4.049218 | 6.296954 | 6.23159  | 6.264272 | 2.247736 | 2.182372 | 2 |
| 9330175E1 | 3.637818 | 5.887073 | 5.633482 | 5.760278 | 2.249255 | 1.995664 | 1 |
| Nid2      | 7.450114 | 9.701201 | 9.321991 | 9.511596 | 2.251087 | 1.871877 | 1 |
| Cotl1     | 13.69845 | 15.95035 | 15.84782 | 15.89909 | 2.251906 | 2.149373 | 2 |
| Slc11a1   | 7.338035 | 9.591887 | 8.877706 | 9.234796 | 2.253852 | 1.539671 | 1 |
| Fkbp10    | 10.47508 | 12.73198 | 12.19759 | 12.46479 | 2.2569   | 1.722514 | 1 |
| Asap3     | 6.757296 | 9.014244 | 8.361442 | 8.687843 | 2.256948 | 1.604146 | 1 |
| Dapp1     | 6.7131   | 8.970834 | 8.996029 | 8.983432 | 2.257734 | 2.282929 | 2 |
| Nup188    | 5.407502 | 7.668902 | 6.030771 | 6.849837 | 2.2614   | 0.62327  | 1 |
| Calca     | 7.357283 | 9.620832 | 9.499093 | 9.559963 | 2.263549 | 2.14181  | 2 |
| 1300002K0 | 6.226704 | 8.491067 | 8.965692 | 8.72838  | 2.264363 | 2.738988 | 2 |
| Atf5      | 12.26066 | 14.52562 | 13.70684 | 14.11623 | 2.26496  | 1.446185 | 1 |
| Clca3     | 2.321946 | 4.588108 | 4.158129 | 4.373118 | 2.266162 | 1.836183 | 1 |
| Vmn2r-ps5 | 2.321946 | 4.590107 | 4.308434 | 4.449271 | 2.268161 | 1.986488 | 1 |
|           | 2.321946 | 4.592069 | 4.559322 | 4.575696 | 2.270123 | 2.237376 | 2 |
| Hmga2     | 6.907581 | 9.178214 | 8.664125 | 8.92117  | 2.270633 | 1.756544 | 1 |
| Bcl2l14   | 5.776368 | 8.047591 | 4.931596 | 6.489594 | 2.271223 | -0.84477 | 1 |
| Olfr371   | 5.226893 | 7.498568 | 4.793105 | 6.145836 | 2.271675 | -0.43379 | 1 |
| Gal3st4   | 6.782741 | 9.056112 | 8.621696 | 8.838904 | 2.273371 | 1.838955 | 1 |
| Bag3      | 8.825977 | 11.0994  | 10.97328 | 11.03634 | 2.273419 | 2.147304 | 2 |
| Rad51     | 6.994471 | 9.268894 | 9.108846 | 9.18887  | 2.274423 | 2.114375 | 2 |
| Car9      | 5.484837 | 7.759473 | 8.694691 | 8.227082 | 2.274636 | 3.209854 | 2 |
| Dbf4      | 6.196279 | 8.471568 | 7.700351 | 8.085959 | 2.275289 | 1.504072 | 1 |
|           | 3.976684 | 6.25531  | 5.634837 | 5.945073 | 2.278626 | 1.658153 | 1 |
| Mcm2      | 8.988736 | 11.26743 | 10.6103  | 10.93886 | 2.27869  | 1.621565 | 1 |
| B4galt1   | 8.874138 | 11.1535  | 10.69228 | 10.92289 | 2.279359 | 1.818144 | 1 |
| Cd79b     | 5.190229 | 7.469817 | 7.793523 | 7.63167  | 2.279588 | 2.603294 | 2 |
| Tirap     | 5.737465 | 8.017197 | 7.113082 | 7.56514  | 2.279732 | 1.375617 | 1 |
| Isg20     | 5.692915 | 7.973214 | 7.256732 | 7.614973 | 2.280299 | 1.563816 | 1 |
| Gna13     | 2.321946 | 4.602593 | 4.023402 | 4.312997 | 2.280647 | 1.701456 | 1 |
| Sla       | 6.295893 | 8.57663  | 8.205036 | 8.390833 | 2.280737 | 1.909143 | 1 |
| Arhgdib   | 10.21518 | 12.49623 | 12.22119 | 12.35871 | 2.281051 | 2.006009 | 2 |
| Trf       | 14.34594 | 16.62729 | 16.2722  | 16.44974 | 2.281353 | 1.926262 | 1 |
| Gmfg      | 8.071669 | 10.35321 | 10.57704 | 10.46512 | 2.281536 | 2.505372 | 2 |
| Capsl     | 5.170769 | 7.452664 | 7.807147 | 7.629906 | 2.281895 | 2.636378 | 2 |
| Hmgn2     | 6.402486 | 8.685675 | 7.865021 | 8.275348 | 2.283189 | 1.462535 | 1 |
| Apbb1ip   | 10.79367 | 13.07701 | 12.64545 | 12.86123 | 2.283342 | 1.851775 | 1 |
| 4833427G0 | 4.732894 | 7.0188   | 7.063653 | 7.041226 | 2.285907 | 2.330759 | 2 |
| Gm5088    | 4.880465 | 7.167959 | 5.415745 | 6.291852 | 2.287494 | 0.535281 | 1 |
| Cyp2r1    | 4.261442 | 6.549447 | 6.174537 | 6.361992 | 2.288005 | 1.913095 | 1 |
| B230110G1 | 4.947981 | 7.236837 | 7.655335 | 7.446086 | 2.288856 | 2.707354 | 2 |
| Cmtm2a    | 5.231172 | 7.522997 | 6.925207 | 7.224102 | 2.291826 | 1.694035 | 1 |
|           | 7.34793  | 9.640649 | 10.2342  | 9.937424 | 2.29272  | 2.886269 | 2 |
| Lrrfip2   | 3.659361 | 5.953366 | 4.461046 | 5.207206 | 2.294005 | 0.801685 | 1 |

|           |          |          |          |          |          |          |   |
|-----------|----------|----------|----------|----------|----------|----------|---|
| Cnn3      | 7.608314 | 9.903601 | 9.261871 | 9.582736 | 2.295287 | 1.653557 | 1 |
| Dhh       | 5.609115 | 7.904642 | 7.414777 | 7.659709 | 2.295527 | 1.805662 | 1 |
| Cmtm2a    | 3.849209 | 6.145072 | 3.833711 | 4.989391 | 2.295863 | -0.0155  | 1 |
| Kctd10    | 5.924914 | 8.221081 | 7.648923 | 7.935002 | 2.296167 | 1.724009 | 1 |
| Cdc40     | 4.170412 | 6.467802 | 3.783544 | 5.125673 | 2.29739  | -0.38687 | 1 |
| Hbegf     | 9.764431 | 12.06204 | 11.11067 | 11.58635 | 2.297606 | 1.346242 | 1 |
| Nupr1     | 9.630844 | 11.92987 | 12.05086 | 11.99037 | 2.299027 | 2.420019 | 2 |
| Mageh1    | 5.429289 | 7.728322 | 6.654499 | 7.191411 | 2.299033 | 1.22521  | 1 |
| Mfsd1     | 7.388808 | 9.688055 | 9.091347 | 9.389701 | 2.299247 | 1.702539 | 1 |
|           | 10.27788 | 12.57754 | 11.80933 | 12.19343 | 2.29966  | 1.531452 | 1 |
| Mcoln2    | 5.965487 | 8.265595 | 7.687435 | 7.976515 | 2.300108 | 1.721948 | 1 |
|           | 3.221191 | 5.522049 | 5.076405 | 5.299227 | 2.300858 | 1.855215 | 1 |
| Galnt15   | 8.337699 | 10.63888 | 10.13344 | 10.38616 | 2.301184 | 1.795737 | 1 |
| Plscr1    | 8.596029 | 10.89754 | 10.36983 | 10.63369 | 2.301515 | 1.773801 | 1 |
| Pdcd6ip   | 2.739744 | 5.042855 | 3.848243 | 4.445549 | 2.303111 | 1.108499 | 1 |
| Cxcl16    | 9.506953 | 11.81069 | 12.19696 | 12.00382 | 2.303737 | 2.690005 | 2 |
| Fam83g    | 5.544474 | 7.849451 | 7.991871 | 7.920661 | 2.304977 | 2.447397 | 2 |
| Phlda2    | 2.321946 | 4.627377 | 4.188003 | 4.40769  | 2.305431 | 1.866057 | 1 |
| Rhbdf2    | 8.346394 | 10.65611 | 9.866783 | 10.26145 | 2.309718 | 1.520389 | 1 |
| Cd200r1   | 6.867943 | 9.178513 | 8.958651 | 9.068582 | 2.31057  | 2.090708 | 2 |
| Sp110     | 9.06551  | 11.37716 | 11.09848 | 11.23782 | 2.311648 | 2.032968 | 2 |
| Vmn2r62   | 2.321946 | 4.634219 | 4.117309 | 4.375764 | 2.312273 | 1.795363 | 1 |
| Ctsc      | 2.321946 | 4.634363 | 3.889446 | 4.261904 | 2.312417 | 1.5675   | 1 |
| Rad18     | 2.321946 | 4.635798 | 4.421977 | 4.528887 | 2.313851 | 2.100031 | 2 |
| Ehd1      | 5.46633  | 7.780422 | 6.856318 | 7.31837  | 2.314092 | 1.389988 | 1 |
| Ces2b     | 3.137645 | 5.452743 | 5.246513 | 5.349628 | 2.315097 | 2.108868 | 2 |
| Ecscr     | 10.44737 | 12.76294 | 12.31045 | 12.5367  | 2.315567 | 1.863082 | 1 |
| Gart      | 4.759715 | 7.081725 | 5.816872 | 6.449298 | 2.32201  | 1.057157 | 1 |
| Il10rb    | 8.221526 | 10.54513 | 9.82858  | 10.18686 | 2.323605 | 1.607054 | 1 |
|           | 5.313758 | 7.638384 | 8.050613 | 7.844499 | 2.324626 | 2.736855 | 2 |
| Slc9a2    | 4.832591 | 7.157923 | 6.568019 | 6.862971 | 2.325332 | 1.735428 | 1 |
| Pik3r5    | 6.663013 | 8.990747 | 8.523167 | 8.756957 | 2.327734 | 1.860154 | 1 |
| Vmn1r49   | 2.321946 | 4.649738 | 4.449607 | 4.549673 | 2.327792 | 2.127661 | 2 |
| 5830432E0 | 2.321946 | 4.651069 | 4.210269 | 4.430669 | 2.329123 | 1.888323 | 1 |
| Rab3il1   | 11.03349 | 13.36416 | 12.76437 | 13.06427 | 2.330671 | 1.730873 | 1 |
| Rbm47     | 5.677428 | 8.008925 | 7.489056 | 7.74899  | 2.331496 | 1.811627 | 1 |
| Ece2      | 9.205776 | 11.53988 | 10.76612 | 11.153   | 2.334104 | 1.560342 | 1 |
| Oip5      | 4.286703 | 6.621232 | 6.355869 | 6.488551 | 2.334529 | 2.069166 | 2 |
| Ppap2a    | 2.366813 | 4.701911 | 4.143191 | 4.422551 | 2.335098 | 1.776378 | 1 |
| 2610203C2 | 3.55741  | 5.893133 | 5.853688 | 5.873411 | 2.335723 | 2.296278 | 2 |
| Srgn      | 11.4368  | 13.77289 | 13.09997 | 13.43643 | 2.33609  | 1.663172 | 1 |
| Hmgn2     | 9.042782 | 11.38198 | 10.7583  | 11.07014 | 2.339199 | 1.715518 | 1 |
| Ston2     | 2.571264 | 4.910651 | 4.209664 | 4.560158 | 2.339387 | 1.638401 | 1 |
| Lonrf3    | 7.951176 | 10.29148 | 10.02645 | 10.15896 | 2.340304 | 2.075269 | 2 |
| Itgb1     | 6.856318 | 9.197427 | 8.539231 | 8.868329 | 2.341109 | 1.682913 | 1 |
| Mxd3      | 4.442976 | 6.785808 | 6.83284  | 6.809324 | 2.342832 | 2.389864 | 2 |
| Ier3      | 7.057193 | 9.400373 | 7.71712  | 8.558746 | 2.34318  | 0.659926 | 1 |

|           |          |          |          |          |          |          |   |
|-----------|----------|----------|----------|----------|----------|----------|---|
| Tnfaip8l2 | 6.087345 | 8.430963 | 8.427583 | 8.429273 | 2.343618 | 2.340238 | 2 |
| Slc4a11   | 8.270409 | 10.61513 | 9.595525 | 10.10533 | 2.344716 | 1.325116 | 1 |
| Ltbr      | 10.86171 | 13.20769 | 12.51794 | 12.86282 | 2.345981 | 1.656228 | 1 |
|           | 7.638569 | 9.98516  | 9.406503 | 9.695832 | 2.346591 | 1.767934 | 1 |
| Rad51b    | 4.512879 | 6.859669 | 6.949715 | 6.904692 | 2.34679  | 2.436836 | 2 |
| Adamts14  | 5.858195 | 8.205036 | 8.082904 | 8.14397  | 2.346841 | 2.224709 | 2 |
| Cks2      | 7.388661 | 9.735939 | 9.675628 | 9.705784 | 2.347278 | 2.286967 | 2 |
| Serping1  | 8.604982 | 10.95253 | 10.8104  | 10.88146 | 2.347546 | 2.205417 | 2 |
| C030044M  | 5.41468  | 7.765545 | 3.642689 | 5.704117 | 2.350865 | -1.77199 | 1 |
| Il1r1     | 8.695579 | 11.0476  | 10.1674  | 10.6075  | 2.352023 | 1.471818 | 1 |
| Gldn      | 9.353268 | 11.70605 | 12.0498  | 11.87793 | 2.352786 | 2.696528 | 2 |
| 2010315BC | 5.261609 | 7.616549 | 4.972673 | 6.294611 | 2.35494  | -0.28894 | 1 |
| Tnfrsf1a  | 6.253148 | 8.610992 | 7.66997  | 8.140481 | 2.357844 | 1.416822 | 1 |
| Gpx8      | 9.481235 | 11.83917 | 11.18496 | 11.51206 | 2.35793  | 1.703729 | 1 |
| Kif23     | 5.365848 | 7.724051 | 7.106137 | 7.415094 | 2.358203 | 1.74029  | 1 |
| Ctsd      | 13.52682 | 15.8853  | 15.87924 | 15.88227 | 2.358479 | 2.352422 | 2 |
| Gpr64     | 4.77228  | 7.130846 | 5.310455 | 6.220651 | 2.358566 | 0.538175 | 1 |
| Defa-rs2  | 8.128622 | 10.4896  | 12.9231  | 11.70635 | 2.360975 | 4.794475 | 2 |
| Cenpe     | 9.089813 | 11.45115 | 11.46191 | 11.45653 | 2.361336 | 2.372094 | 2 |
| Hn1l      | 4.342939 | 6.705494 | 5.664313 | 6.184903 | 2.362555 | 1.321374 | 1 |
| Rbm47     | 5.214616 | 7.577694 | 7.171086 | 7.37439  | 2.363078 | 1.95647  | 1 |
| Spn       | 2.336334 | 4.699561 | 4.525047 | 4.612304 | 2.363227 | 2.188713 | 2 |
| Angptl4   | 10.15856 | 12.52199 | 11.92665 | 12.22432 | 2.36343  | 1.768087 | 1 |
| Pstpip1   | 5.178442 | 7.542596 | 6.635107 | 7.088851 | 2.364154 | 1.456665 | 1 |
| Fhod1     | 7.064529 | 9.42906  | 8.564577 | 8.996819 | 2.364531 | 1.500048 | 1 |
|           | 13.32634 | 15.69126 | 15.03213 | 15.3617  | 2.364926 | 1.705794 | 1 |
|           | 8.135335 | 10.5016  | 9.603742 | 10.05267 | 2.366264 | 1.468407 | 1 |
| Htr4      | 5.626669 | 7.99859  | 8.507145 | 8.252867 | 2.37192  | 2.880476 | 2 |
|           | 5.411938 | 7.784126 | 7.810578 | 7.797352 | 2.372189 | 2.39864  | 2 |
| Sh3bp2    | 9.347178 | 11.72603 | 11.59556 | 11.66079 | 2.37885  | 2.24838  | 2 |
|           | 6.804922 | 9.185399 | 9.772334 | 9.478867 | 2.380477 | 2.967412 | 2 |
|           | 4.246353 | 6.628072 | 5.315145 | 5.971608 | 2.381719 | 1.068792 | 1 |
| Samd11    | 2.321946 | 4.703676 | 5.130446 | 4.917061 | 2.38173  | 2.8085   | 2 |
| Npm1      | 9.619587 | 12.0022  | 11.45748 | 11.72984 | 2.38261  | 1.837896 | 1 |
|           | 5.243826 | 7.626664 | 7.236605 | 7.431634 | 2.382837 | 1.992779 | 1 |
|           | 3.575734 | 5.959412 | 4.165675 | 5.062543 | 2.383678 | 0.58994  | 1 |
| 150001501 | 9.52751  | 11.91132 | 11.5505  | 11.73091 | 2.383811 | 2.022989 | 2 |
| Syne3     | 2.757051 | 5.141486 | 4.454618 | 4.798052 | 2.384435 | 1.697567 | 1 |
| Procr     | 8.38286  | 10.7677  | 10.71417 | 10.74093 | 2.38484  | 2.33131  | 2 |
| Arhgap9   | 8.612451 | 10.99813 | 10.95041 | 10.97427 | 2.385683 | 2.33796  | 2 |
|           | 2.321946 | 4.709016 | 5.67214  | 5.190578 | 2.38707  | 3.350194 | 2 |
| Tshz2     | 6.451155 | 8.839065 | 8.263906 | 8.551486 | 2.38791  | 1.812751 | 1 |
| Mdfi      | 4.009561 | 6.400655 | 7.176356 | 6.788506 | 2.391095 | 3.166795 | 2 |
| Pon3      | 9.478649 | 11.87035 | 12.24353 | 12.05694 | 2.391696 | 2.76488  | 2 |
| Irs1      | 5.116665 | 7.512625 | 8.179853 | 7.846239 | 2.395959 | 3.063187 | 2 |
| Olfr32    | 2.498201 | 4.894597 | 4.42439  | 4.659493 | 2.396395 | 1.926189 | 1 |
| B3gnt5    | 6.99493  | 9.392222 | 9.360083 | 9.376153 | 2.397292 | 2.365153 | 2 |



|          |          |          |          |          |          |          |   |
|----------|----------|----------|----------|----------|----------|----------|---|
| Zfp36    | 5.759858 | 8.160694 | 7.126582 | 7.643638 | 2.400836 | 1.366724 | 1 |
| Chst9    | 4.593633 | 6.996625 | 7.312682 | 7.154653 | 2.402992 | 2.719049 | 2 |
| Olfr1420 | 2.321946 | 4.725915 | 4.081229 | 4.403572 | 2.403969 | 1.759283 | 1 |
| Ccdc73   | 3.632915 | 6.037451 | 5.108766 | 5.573108 | 2.404537 | 1.475851 | 1 |
| Gm10387  | 4.200823 | 6.608082 | 5.867419 | 6.237751 | 2.407259 | 1.666596 | 1 |
| Scimp    | 5.335978 | 7.748435 | 7.324619 | 7.536527 | 2.412457 | 1.988641 | 1 |
| Srrt     | 4.227166 | 6.640154 | 4.966281 | 5.803218 | 2.412988 | 0.739115 | 1 |
| Shcbp1   | 8.394759 | 10.80862 | 11.04946 | 10.92904 | 2.413861 | 2.654701 | 2 |
|          | 4.525851 | 6.9406   | 3.832633 | 5.386617 | 2.414749 | -0.69322 | 1 |
| Psemb9   | 8.191626 | 10.60669 | 9.98751  | 10.2971  | 2.415066 | 1.795884 | 1 |
| Gm7931   | 5.846721 | 8.266873 | 7.466943 | 7.866908 | 2.420152 | 1.620222 | 1 |
| Maff     | 7.249081 | 9.669854 | 8.99745  | 9.333652 | 2.420773 | 1.748369 | 1 |
| Tspan4   | 10.73607 | 13.15726 | 12.24168 | 12.69947 | 2.421192 | 1.50561  | 1 |
| Gm4907   | 5.264029 | 7.687916 | 7.344164 | 7.51604  | 2.423888 | 2.080136 | 2 |
| Tead4    | 3.123859 | 5.548314 | 4.254559 | 4.901436 | 2.424455 | 1.1307   | 1 |
| H2-DMb1  | 6.688696 | 9.113769 | 8.827611 | 8.97069  | 2.425073 | 2.138915 | 2 |
| Ttk      | 2.744582 | 5.1702   | 4.68355  | 4.926875 | 2.425618 | 1.938968 | 1 |
| Ncaph    | 9.423946 | 11.852   | 11.71503 | 11.78351 | 2.42805  | 2.291081 | 2 |
|          | 5.461507 | 7.889562 | 7.32618  | 7.607871 | 2.428055 | 1.864673 | 1 |
| Gbp3     | 11.20449 | 13.63568 | 13.57103 | 13.60336 | 2.431188 | 2.366541 | 2 |
| Ncf2     | 2.321946 | 4.75359  | 4.691109 | 4.72235  | 2.431644 | 2.369163 | 2 |
| D330045A | 6.056996 | 8.488656 | 7.670349 | 8.079502 | 2.43166  | 1.613353 | 1 |
| Pkp2     | 8.421968 | 10.85525 | 11.02246 | 10.93885 | 2.433279 | 2.600492 | 2 |
| Plscr2   | 9.334377 | 11.77155 | 11.43674 | 11.60414 | 2.437168 | 2.102359 | 2 |
| Magt1    | 6.507318 | 8.944942 | 8.676358 | 8.81065  | 2.437624 | 2.169041 | 2 |
| Cdt1     | 9.069261 | 11.50885 | 10.94462 | 11.22673 | 2.439588 | 1.875358 | 1 |
| Ang2     | 3.249389 | 5.689039 | 5.316425 | 5.502732 | 2.43965  | 2.067036 | 2 |
| Afg3l1   | 2.321946 | 4.764824 | 5.303662 | 5.034243 | 2.442878 | 2.981716 | 2 |
| Dap      | 8.155914 | 10.60161 | 10.30231 | 10.45196 | 2.445697 | 2.146398 | 2 |
| Ranbp3l  | 2.746644 | 5.193025 | 3.847118 | 4.520072 | 2.446381 | 1.100475 | 1 |
| Lcorl    | 3.78243  | 6.229802 | 5.614687 | 5.922245 | 2.447372 | 1.832257 | 1 |
| Cybrd1   | 5.259571 | 7.707443 | 8.295932 | 8.001687 | 2.447872 | 3.036361 | 2 |
| Eps15l1  | 7.151183 | 9.599944 | 9.352325 | 9.476134 | 2.448761 | 2.201142 | 2 |
| Tnfrsf26 | 5.473581 | 7.922655 | 7.739693 | 7.831174 | 2.449074 | 2.266111 | 2 |
| Hspb6    | 11.43278 | 13.88502 | 13.5368  | 13.71091 | 2.452241 | 2.104024 | 2 |
| Slc30a7  | 4.459063 | 6.911888 | 5.942314 | 6.427101 | 2.452825 | 1.483251 | 1 |
| Cd1d1    | 3.598137 | 6.052539 | 5.985651 | 6.019095 | 2.454402 | 2.387514 | 2 |
| Xlr5a    | 4.962116 | 7.41803  | 4.787048 | 6.102539 | 2.455914 | -0.17507 | 1 |
| Tec      | 4.741998 | 7.199947 | 5.897714 | 6.54883  | 2.457949 | 1.155716 | 1 |
| Rab27a   | 3.125477 | 5.584563 | 4.513736 | 5.04915  | 2.459086 | 1.388259 | 1 |
| Car13    | 7.298983 | 9.758875 | 9.17439  | 9.466633 | 2.459892 | 1.875407 | 1 |
| Ear11    | 2.327242 | 4.789576 | 4.608207 | 4.698891 | 2.462334 | 2.280965 | 2 |
| Ddx11    | 4.967044 | 7.431702 | 7.161686 | 7.296694 | 2.464658 | 2.194642 | 2 |
| Pole     | 4.759218 | 7.227336 | 6.993499 | 7.110418 | 2.468118 | 2.234282 | 2 |
|          | 2.361441 | 4.830049 | 6.518264 | 5.674156 | 2.468608 | 4.156823 | 2 |
| Tmem184a | 3.228335 | 5.699102 | 4.534914 | 5.117008 | 2.470768 | 1.306579 | 1 |
|          | 5.432774 | 7.904056 | 4.618553 | 6.261305 | 2.471282 | -0.81422 | 1 |

|             |          |          |          |          |          |          |   |
|-------------|----------|----------|----------|----------|----------|----------|---|
| Gsg2        | 4.53528  | 7.007299 | 6.578653 | 6.792976 | 2.47202  | 2.043374 | 2 |
| Gm2005      | 2.321946 | 4.795168 | 4.232073 | 4.513621 | 2.473222 | 1.910127 | 1 |
|             | 3.418194 | 5.892145 | 4.806461 | 5.349303 | 2.473951 | 1.388268 | 1 |
|             | 6.165069 | 8.64084  | 7.795944 | 8.218392 | 2.475771 | 1.630875 | 1 |
| Rars        | 4.562154 | 7.038074 | 6.437514 | 6.737794 | 2.47592  | 1.87536  | 1 |
| Parpbp      | 4.686118 | 7.163219 | 7.442605 | 7.302912 | 2.477101 | 2.756487 | 2 |
| Cenpa       | 6.170401 | 8.650336 | 8.015514 | 8.332925 | 2.479935 | 1.845113 | 1 |
| Gpr171      | 3.969419 | 6.449373 | 5.654493 | 6.051933 | 2.479955 | 1.685075 | 1 |
| Arpc3       | 10.14881 | 12.63108 | 11.45563 | 12.04335 | 2.482273 | 1.306825 | 1 |
|             | 4.069077 | 6.551999 | 6.041259 | 6.296629 | 2.482922 | 1.972182 | 1 |
| 1110025L1   | 3.723558 | 6.207109 | 6.344236 | 6.275672 | 2.48355  | 2.620678 | 2 |
| Neat1       | 12.23014 | 14.7143  | 13.88934 | 14.30182 | 2.484157 | 1.659194 | 1 |
| Eef2k       | 3.737388 | 6.221551 | 5.208881 | 5.715216 | 2.484163 | 1.471494 | 1 |
|             | 5.331319 | 7.816185 | 6.920794 | 7.368489 | 2.484865 | 1.589474 | 1 |
| C1qb        | 8.767234 | 11.25396 | 10.95306 | 11.10351 | 2.48673  | 2.185822 | 2 |
| Ucp3        | 5.847265 | 8.334892 | 8.231858 | 8.283375 | 2.487627 | 2.384593 | 2 |
| Rpp40       | 4.579625 | 7.069259 | 6.204731 | 6.636995 | 2.489634 | 1.625106 | 1 |
| Gch1        | 8.074237 | 10.5649  | 9.63481  | 10.09986 | 2.490663 | 1.560573 | 1 |
| C130026I2   | 4.669228 | 7.160112 | 7.772413 | 7.466263 | 2.490884 | 3.103186 | 2 |
| Gm9733      | 2.321946 | 4.814146 | 5.297526 | 5.055836 | 2.4922   | 2.97558  | 2 |
| Gm1110      | 2.321946 | 4.814537 | 4.249646 | 4.532091 | 2.492591 | 1.9277   | 1 |
| Tlr13       | 10.99318 | 13.4858  | 12.92131 | 13.20355 | 2.49262  | 1.92813  | 1 |
| Ppic        | 8.312062 | 10.80563 | 10.70635 | 10.75599 | 2.493567 | 2.39429  | 2 |
| Col5a3      | 8.052122 | 10.54657 | 11.07755 | 10.81206 | 2.494444 | 3.02543  | 2 |
| Csf1        | 6.016891 | 8.512165 | 8.298254 | 8.40521  | 2.495275 | 2.281364 | 2 |
| Gins1       | 8.263906 | 10.76005 | 10.40606 | 10.58306 | 2.496146 | 2.142158 | 2 |
| Hk3         | 5.368331 | 7.864579 | 6.297535 | 7.081057 | 2.496247 | 0.929203 | 1 |
| Cks1b       | 10.11993 | 12.61622 | 12.20105 | 12.40863 | 2.496286 | 2.081121 | 2 |
| Mak         | 4.645167 | 7.146598 | 7.535328 | 7.340963 | 2.501431 | 2.890161 | 2 |
| Arpc1b      | 12.98473 | 15.4866  | 15.3455  | 15.41605 | 2.501868 | 2.360772 | 2 |
| Hck         | 9.835857 | 12.33924 | 12.04999 | 12.19462 | 2.503386 | 2.214131 | 2 |
| Ly96        | 7.298803 | 9.804507 | 9.384894 | 9.594701 | 2.505704 | 2.086091 | 2 |
| Nfe2        | 4.462921 | 6.974466 | 5.312954 | 6.14371  | 2.511546 | 0.850033 | 1 |
| Klrd1       | 4.516954 | 7.029154 | 4.492874 | 5.761014 | 2.512201 | -0.02408 | 1 |
|             | 10.12234 | 12.63514 | 12.18035 | 12.40775 | 2.512802 | 2.058016 | 2 |
| Actn1       | 6.209612 | 8.723121 | 4.779328 | 6.751225 | 2.513509 | -1.43028 | 1 |
| Ceacam12    | 2.321946 | 4.835479 | 3.849209 | 4.342344 | 2.513533 | 1.527263 | 1 |
| Zbp1        | 6.996338 | 9.51018  | 8.842089 | 9.176134 | 2.513842 | 1.845751 | 1 |
| Pter        | 4.094363 | 6.608634 | 7.054709 | 6.831672 | 2.514271 | 2.960346 | 2 |
| Gngt2       | 10.84806 | 13.36634 | 13.43247 | 13.39941 | 2.518288 | 2.584414 | 2 |
| Ucp2        | 7.332441 | 9.851197 | 9.947638 | 9.899418 | 2.518756 | 2.615197 | 2 |
| Krt8        | 5.4089   | 7.928147 | 7.533036 | 7.730592 | 2.519247 | 2.124136 | 2 |
| Apobr       | 5.614687 | 8.134563 | 7.556914 | 7.845739 | 2.519876 | 1.942227 | 1 |
| 4930404O1   | 4.83913  | 7.360329 | 3.991216 | 5.675772 | 2.521198 | -0.84791 | 1 |
| Hnrnpa3     | 5.532384 | 8.054346 | 4.472429 | 6.263388 | 2.521962 | -1.05996 | 1 |
| Prrx2       | 7.653064 | 10.17736 | 9.82503  | 10.00119 | 2.524295 | 2.171966 | 2 |
| Evi2a-evi2t | 3.451835 | 5.977507 | 5.263921 | 5.620714 | 2.525672 | 1.812086 | 1 |

|           |          |          |          |          |          |          |   |
|-----------|----------|----------|----------|----------|----------|----------|---|
| Cd1d1     | 7.227445 | 9.754775 | 10.15536 | 9.955066 | 2.52733  | 2.927911 | 2 |
| Rbl1      | 4.122454 | 6.650114 | 6.256637 | 6.453375 | 2.52766  | 2.134183 | 2 |
| Atp1a2    | 7.60177  | 10.12944 | 9.206297 | 9.667867 | 2.527667 | 1.604527 | 1 |
| Efcab11   | 2.514214 | 5.04548  | 5.435951 | 5.240715 | 2.531266 | 2.921737 | 2 |
| Cd63      | 13.40729 | 15.94014 | 15.50185 | 15.72099 | 2.532851 | 2.094558 | 2 |
| Scgb1c1   | 4.719688 | 7.253847 | 4.728528 | 5.991187 | 2.534158 | 0.00884  | 1 |
| Fam25c    | 3.330323 | 5.870158 | 6.53943  | 6.204794 | 2.539835 | 3.209108 | 2 |
| Klrc1     | 5.951241 | 8.491973 | 5.623941 | 7.057957 | 2.540732 | -0.3273  | 1 |
| Lgals3bp  | 12.06863 | 14.61493 | 14.79519 | 14.70506 | 2.546296 | 2.726555 | 2 |
| Apof      | 2.321946 | 4.86972  | 4.316353 | 4.593037 | 2.547774 | 1.994407 | 1 |
| Afp       | 7.026458 | 9.575906 | 9.337589 | 9.456748 | 2.549448 | 2.311131 | 2 |
| Dok1      | 4.058025 | 6.607519 | 5.913409 | 6.260464 | 2.549493 | 1.855383 | 1 |
| Odc1      | 4.387716 | 6.937368 | 5.562032 | 6.2497   | 2.549652 | 1.174315 | 1 |
| Gm6531    | 4.397289 | 6.947571 | 5.924063 | 6.435817 | 2.550282 | 1.526773 | 1 |
| Clec1b    | 3.529007 | 6.079421 | 7.089638 | 6.58453  | 2.550414 | 3.560631 | 2 |
| Bard1     | 6.307956 | 8.859268 | 8.625197 | 8.742233 | 2.551312 | 2.317241 | 2 |
| Ugt1a6b   | 10.63428 | 13.18652 | 13.07455 | 13.13054 | 2.552247 | 2.440273 | 2 |
| Esm1      | 5.65324  | 8.205606 | 8.899295 | 8.55245  | 2.552366 | 3.246055 | 2 |
| C530044C1 | 5.682767 | 8.241665 | 8.660778 | 8.451222 | 2.558898 | 2.978011 | 2 |
| T         | 4.210401 | 6.770009 | 7.532394 | 7.151202 | 2.559608 | 3.321993 | 2 |
| Snrpd3    | 9.617065 | 12.17829 | 11.0968  | 11.63755 | 2.561227 | 1.479735 | 1 |
| Ctla2b    | 9.694103 | 12.25639 | 11.99327 | 12.12483 | 2.56229  | 2.299163 | 2 |
| Pdia3     | 10.97185 | 13.53513 | 12.02656 | 12.78084 | 2.563274 | 1.054708 | 1 |
| Stac      | 5.745602 | 8.309728 | 8.664975 | 8.487352 | 2.564126 | 2.919373 | 2 |
| Skap2     | 10.3909  | 12.95831 | 12.60402 | 12.78117 | 2.567411 | 2.213122 | 2 |
| Chi3l1    | 11.20365 | 13.77134 | 12.67969 | 13.22551 | 2.567689 | 1.476046 | 1 |
| Shmt1     | 3.477397 | 6.046688 | 5.199563 | 5.623125 | 2.569291 | 1.722166 | 1 |
| Slc4a5    | 6.628072 | 9.201991 | 6.971082 | 8.086537 | 2.573919 | 0.34301  | 1 |
| A530064N  | 2.321946 | 4.896158 | 4.598985 | 4.747572 | 2.574212 | 2.277039 | 2 |
| Tagln     | 11.38266 | 13.95888 | 13.14059 | 13.54973 | 2.576214 | 1.757923 | 1 |
| Gdf7      | 4.084397 | 6.66266  | 3.881026 | 5.271843 | 2.578263 | -0.20337 | 1 |
| Cbr2      | 8.674138 | 11.25313 | 10.45541 | 10.85427 | 2.578993 | 1.781272 | 1 |
| Trim30a   | 8.262313 | 10.84146 | 10.67548 | 10.75847 | 2.579142 | 2.413171 | 2 |
| P2ry2     | 6.904731 | 9.485524 | 8.860883 | 9.173204 | 2.580793 | 1.956152 | 1 |
| Gm12666   | 6.258884 | 8.841311 | 6.224379 | 7.532845 | 2.582427 | -0.03451 | 1 |
|           | 3.997528 | 6.581489 | 5.251223 | 5.916356 | 2.583961 | 1.253695 | 1 |
| Spc25     | 8.679662 | 11.2644  | 11.69328 | 11.47884 | 2.584741 | 3.013617 | 2 |
| Tyrobp    | 11.47306 | 14.05845 | 14.23186 | 14.14516 | 2.585391 | 2.758801 | 2 |
| Havcr2    | 9.362333 | 11.94867 | 12.3916  | 12.17013 | 2.586336 | 3.029263 | 2 |
| Anxa1     | 10.86439 | 13.45643 | 13.25631 | 13.35637 | 2.592041 | 2.391913 | 2 |
|           | 7.333487 | 9.926402 | 9.755029 | 9.840716 | 2.592915 | 2.421542 | 2 |
| Plek      | 12.00777 | 14.6029  | 14.57332 | 14.58811 | 2.59513  | 2.565547 | 2 |
| Actbl2    | 3.688638 | 6.284661 | 5.456323 | 5.870492 | 2.596023 | 1.767684 | 1 |
| Olfr926   | 5.487903 | 8.084743 | 5.482298 | 6.783521 | 2.59684  | -0.0056  | 1 |
|           | 3.424417 | 6.02135  | 5.552771 | 5.78706  | 2.596933 | 2.128354 | 2 |
| Adamts9   | 7.305536 | 9.906014 | 9.096751 | 9.501382 | 2.600477 | 1.791215 | 1 |
| 4933432I0 | 2.321946 | 4.922878 | 5.057522 | 4.9902   | 2.600932 | 2.735576 | 2 |

|           |          |          |          |          |          |          |   |
|-----------|----------|----------|----------|----------|----------|----------|---|
| Batf      | 5.467742 | 8.071076 | 7.047331 | 7.559204 | 2.603335 | 1.57959  | 1 |
| Exo1      | 7.140486 | 9.745814 | 9.270588 | 9.508201 | 2.605328 | 2.130102 | 2 |
|           | 2.321946 | 4.931896 | 4.177577 | 4.554736 | 2.60995  | 1.85563  | 1 |
| Lgals9    | 6.412075 | 9.022453 | 8.735394 | 8.878924 | 2.610378 | 2.323319 | 2 |
| Lcp1      | 6.37313  | 8.983643 | 8.550641 | 8.767142 | 2.610513 | 2.177511 | 2 |
| Ripk1     | 5.944538 | 8.555263 | 7.610468 | 8.082866 | 2.610725 | 1.66593  | 1 |
| Rbp1      | 10.95253 | 13.5641  | 14.06315 | 13.81363 | 2.611571 | 3.110624 | 2 |
| Pnp2      | 4.524758 | 7.139461 | 7.449226 | 7.294344 | 2.614703 | 2.924468 | 2 |
| Spg20     | 4.449607 | 7.065002 | 4.937246 | 6.001124 | 2.615395 | 0.487639 | 1 |
|           | 4.729009 | 7.344636 | 6.474851 | 6.909744 | 2.615627 | 1.745842 | 1 |
| Atp6v0d2  | 2.321946 | 4.941064 | 4.219377 | 4.580221 | 2.619118 | 1.897431 | 1 |
| Clec12b   | 4.005143 | 6.62554  | 4.277834 | 5.451687 | 2.620398 | 0.272691 | 1 |
| Csf1r     | 5.238265 | 7.860147 | 7.76886  | 7.814504 | 2.621882 | 2.530595 | 2 |
| Ada       | 8.39403  | 11.01893 | 10.58488 | 10.80191 | 2.624898 | 2.190854 | 2 |
| Ccnd1     | 10.41126 | 13.0369  | 11.58966 | 12.31328 | 2.625632 | 1.178398 | 1 |
| Sptlc2    | 4.370967 | 6.998421 | 6.063922 | 6.531171 | 2.627454 | 1.692954 | 1 |
| 4930543E1 | 5.556593 | 8.185311 | 4.895991 | 6.540651 | 2.628718 | -0.6606  | 1 |
| Alas2     | 5.775123 | 8.405182 | 7.879356 | 8.142269 | 2.630059 | 2.104233 | 2 |
| Dock2     | 3.563871 | 6.19586  | 4.212361 | 5.204111 | 2.63199  | 0.648491 | 1 |
| 4930427AC | 2.396903 | 5.030349 | 4.321909 | 4.676129 | 2.633447 | 1.925006 | 1 |
| Rnf183    | 2.321946 | 4.955686 | 5.368019 | 5.161852 | 2.63374  | 3.046073 | 2 |
| Bpifb3    | 6.841839 | 9.475936 | 8.211951 | 8.843944 | 2.634097 | 1.370112 | 1 |
| Sp140     | 3.34634  | 5.980736 | 5.968383 | 5.97456  | 2.634397 | 2.622043 | 2 |
| Lrp4      | 5.329625 | 7.969902 | 7.055029 | 7.512465 | 2.640277 | 1.725404 | 1 |
| Ccdc36    | 4.975177 | 7.617607 | 4.637553 | 6.12758  | 2.64243  | -0.33762 | 1 |
| Aqp1      | 5.281027 | 7.924599 | 8.211706 | 8.068152 | 2.643571 | 2.930679 | 2 |
| Mmp27     | 4.304946 | 6.949715 | 7.060165 | 7.00494  | 2.644769 | 2.755219 | 2 |
| Ccdc67    | 2.321946 | 4.973236 | 5.764936 | 5.369086 | 2.65129  | 3.44299  | 2 |
|           | 3.328859 | 5.980244 | 5.281814 | 5.631029 | 2.651385 | 1.952955 | 1 |
| Ptpn18    | 10.49601 | 13.14851 | 12.7282  | 12.93835 | 2.652493 | 2.232183 | 2 |
| C1qc      | 13.0853  | 15.73815 | 16.00266 | 15.8704  | 2.652848 | 2.917365 | 2 |
| Gfpt1     | 3.410154 | 6.065811 | 4.42516  | 5.245486 | 2.655656 | 1.015006 | 1 |
| Dpep2     | 5.715283 | 8.37167  | 8.187655 | 8.279662 | 2.656387 | 2.472371 | 2 |
| Mab21l2   | 3.431315 | 6.094352 | 6.466225 | 6.280288 | 2.663037 | 3.034909 | 2 |
|           | 3.682257 | 6.346654 | 8.584414 | 7.465534 | 2.664398 | 4.902158 | 2 |
| Tnfsf8    | 2.329691 | 4.995064 | 4.106315 | 4.550689 | 2.665373 | 1.776624 | 1 |
|           | 2.321946 | 4.990502 | 4.820251 | 4.905377 | 2.668556 | 2.498305 | 2 |
|           | 6.19586  | 8.866595 | 7.22203  | 8.044312 | 2.670735 | 1.026169 | 1 |
| Shroom3   | 6.26672  | 8.939835 | 8.478719 | 8.709277 | 2.673115 | 2.211999 | 2 |
|           | 6.858886 | 9.53361  | 8.766407 | 9.150009 | 2.674724 | 1.907521 | 1 |
| 4732419C1 | 4.27095  | 6.948844 | 7.691278 | 7.320061 | 2.677894 | 3.420328 | 2 |
| Gjb3      | 4.210889 | 6.899552 | 8.155514 | 7.527533 | 2.688663 | 3.944625 | 2 |
| Casp8     | 7.017107 | 9.707144 | 9.129685 | 9.418415 | 2.690037 | 2.112578 | 2 |
| Fam83e    | 2.321946 | 5.013948 | 4.76235  | 4.888149 | 2.692002 | 2.440404 | 2 |
| Mapkapk3  | 2.852089 | 5.544316 | 5.009187 | 5.276752 | 2.692227 | 2.157098 | 2 |
| Ms4a4c    | 5.17836  | 7.871967 | 6.551625 | 7.211796 | 2.693608 | 1.373266 | 1 |
| 4933403J1 | 4.35925  | 7.057193 | 5.455226 | 6.25621  | 2.697943 | 1.095976 | 1 |

|            |          |          |          |          |          |          |   |
|------------|----------|----------|----------|----------|----------|----------|---|
| Olfml2b    | 4.709622 | 7.407855 | 6.443637 | 6.925746 | 2.698233 | 1.734015 | 1 |
| Rgs18      | 4.336443 | 7.034993 | 6.909645 | 6.972319 | 2.69855  | 2.573203 | 2 |
| Rtp4       | 10.41463 | 13.11443 | 12.63807 | 12.87625 | 2.699794 | 2.223432 | 2 |
| Clic6      | 6.541555 | 9.246715 | 8.356927 | 8.801821 | 2.705161 | 1.815373 | 1 |
| Tmem239    | 4.119617 | 6.826247 | 4.250166 | 5.538206 | 2.70663  | 0.130549 | 1 |
| 1700037C1  | 5.327844 | 8.036079 | 4.910769 | 6.473424 | 2.708235 | -0.41708 | 1 |
| 5730416F0  | 5.627107 | 8.335352 | 6.135063 | 7.235208 | 2.708245 | 0.507956 | 1 |
| Slc35d2    | 5.087338 | 7.796404 | 7.405343 | 7.600874 | 2.709066 | 2.318005 | 2 |
| Rsad2      | 6.910751 | 9.621481 | 9.241179 | 9.43133  | 2.71073  | 2.330427 | 2 |
| Frem3      | 2.321946 | 5.032793 | 6.863906 | 5.94835  | 2.710847 | 4.54196  | 2 |
| Nek2       | 5.122257 | 7.834348 | 7.520008 | 7.677178 | 2.712091 | 2.397751 | 2 |
| Cyba       | 7.293128 | 10.0096  | 9.355593 | 9.682596 | 2.716472 | 2.062466 | 2 |
| Gdnf       | 4.014481 | 6.73205  | 6.627136 | 6.679593 | 2.717569 | 2.612655 | 2 |
| Tnfrsf1a   | 10.15467 | 12.87692 | 12.26143 | 12.56918 | 2.722252 | 2.106762 | 2 |
| Ncl        | 8.828174 | 11.55088 | 9.922273 | 10.73658 | 2.722706 | 1.094099 | 1 |
| Fgl2       | 4.973236 | 7.698648 | 7.6731   | 7.685874 | 2.725412 | 2.699864 | 2 |
| Knstrn     | 3.903701 | 6.630573 | 5.96618  | 6.298377 | 2.726872 | 2.062479 | 2 |
| Cd48       | 9.4453   | 12.17239 | 11.92541 | 12.0489  | 2.727089 | 2.480111 | 2 |
| Dab2       | 10.8332  | 13.56311 | 12.66946 | 13.11629 | 2.729914 | 1.836265 | 1 |
| Kif20b     | 7.872377 | 10.6055  | 10.42648 | 10.51599 | 2.733125 | 2.5541   | 2 |
| Lpxn       | 7.845462 | 10.57994 | 10.06511 | 10.32252 | 2.73448  | 2.219644 | 2 |
| 1700009N1  | 4.129441 | 6.866102 | 6.706653 | 6.786377 | 2.736661 | 2.577212 | 2 |
| Il1rap     | 5.731411 | 8.468246 | 7.452664 | 7.960455 | 2.736836 | 1.721254 | 1 |
| Trip13     | 6.010279 | 8.747186 | 8.444909 | 8.596048 | 2.736907 | 2.43463  | 2 |
| S1pr2      | 5.12951  | 7.869707 | 7.293009 | 7.581358 | 2.740196 | 2.163499 | 2 |
| Gpr101     | 5.813254 | 8.554433 | 8.821501 | 8.687967 | 2.741179 | 3.008247 | 2 |
| 4930486L2  | 3.932874 | 6.674959 | 6.012353 | 6.343656 | 2.742085 | 2.079479 | 2 |
| Irak4      | 3.045775 | 5.789811 | 5.144589 | 5.4672   | 2.744036 | 2.098814 | 2 |
| Fut4       | 2.321946 | 5.066134 | 4.797265 | 4.931699 | 2.744187 | 2.475319 | 2 |
| Wdr86      | 5.703387 | 8.448644 | 7.159823 | 7.804234 | 2.745257 | 1.456436 | 1 |
| Net1       | 2.993724 | 5.7396   | 4.468699 | 5.10415  | 2.745876 | 1.474975 | 1 |
| Cd93       | 10.38294 | 13.13231 | 12.43342 | 12.78286 | 2.749372 | 2.050482 | 2 |
| 4933416I08 | 3.963908 | 6.714059 | 4.693824 | 5.703942 | 2.750151 | 0.729917 | 1 |
| Dyrk4      | 2.321946 | 5.074632 | 5.264294 | 5.169463 | 2.752686 | 2.942348 | 2 |
| Cfi        | 2.321946 | 5.076165 | 5.858493 | 5.467329 | 2.754219 | 3.536547 | 2 |
| Tgm2       | 9.489853 | 12.24421 | 10.62158 | 11.43289 | 2.754355 | 1.131728 | 1 |
| Stfa211    | 5.226452 | 7.983089 | 5.891249 | 6.937169 | 2.756637 | 0.664797 | 1 |
|            | 6.211767 | 8.968781 | 8.467368 | 8.718074 | 2.757014 | 2.255601 | 2 |
| 1600022D1  | 2.321946 | 5.07899  | 5.311357 | 5.195174 | 2.757044 | 2.989411 | 2 |
| 4930556M   | 2.321946 | 5.079087 | 6.302571 | 5.690829 | 2.757141 | 3.980625 | 2 |
| Zfp558     | 4.021147 | 6.779057 | 4.211523 | 5.49529  | 2.75791  | 0.190376 | 1 |
| Ctse       | 5.362075 | 8.122411 | 9.382935 | 8.752673 | 2.760336 | 4.02086  | 2 |
| Ccr5       | 7.81877  | 10.58127 | 9.4995   | 10.04039 | 2.762501 | 1.68073  | 1 |
|            | 5.729583 | 8.492804 | 5.383909 | 6.938357 | 2.763221 | -0.34567 | 1 |
| Slc6a5     | 3.861407 | 6.625509 | 9.952284 | 8.288897 | 2.764102 | 6.090877 | 2 |
| Tgif1      | 9.163666 | 11.93447 | 11.6051  | 11.76979 | 2.770806 | 2.441438 | 2 |
| Tnfrsf1b   | 6.182025 | 8.955061 | 8.849848 | 8.902455 | 2.773037 | 2.667824 | 2 |

|           |          |          |          |          |          |          |   |
|-----------|----------|----------|----------|----------|----------|----------|---|
| Ctsz      | 10.7179  | 13.49157 | 13.15129 | 13.32143 | 2.773672 | 2.433383 | 2 |
| Mgst1     | 10.03502 | 12.81673 | 11.88771 | 12.35222 | 2.781708 | 1.852687 | 1 |
| Parp14    | 9.806957 | 12.58884 | 12.19089 | 12.38986 | 2.781878 | 2.383929 | 2 |
|           | 4.742189 | 7.533036 | 4.640977 | 6.087006 | 2.790847 | -0.10121 | 1 |
| Alox5ap   | 9.172742 | 11.96378 | 11.30903 | 11.63641 | 2.791039 | 2.136291 | 2 |
| Sh3bgrl2  | 4.651225 | 7.442812 | 5.411164 | 6.426988 | 2.791587 | 0.759939 | 1 |
| Myo7a     | 7.080898 | 9.873727 | 9.455365 | 9.664546 | 2.792829 | 2.374467 | 2 |
| Itsn1     | 2.321946 | 5.115472 | 4.469188 | 4.79233  | 2.793526 | 2.147242 | 2 |
| Cytip     | 5.653403 | 8.451443 | 7.886976 | 8.16921  | 2.79804  | 2.233573 | 2 |
| Zfhx4     | 3.25925  | 6.06159  | 3.846202 | 4.953896 | 2.80234  | 0.586952 | 1 |
| Steap1    | 6.147291 | 8.950002 | 8.491067 | 8.720535 | 2.802711 | 2.343776 | 2 |
|           | 6.882345 | 9.693415 | 9.75216  | 9.722788 | 2.81107  | 2.869815 | 2 |
| Defa-rs7  | 2.321946 | 5.134189 | 7.782419 | 6.458304 | 2.812243 | 5.460473 | 2 |
| Cd48      | 7.646928 | 10.46127 | 9.955146 | 10.20821 | 2.814345 | 2.308218 | 2 |
| Ankrd36   | 4.817615 | 7.632206 | 3.116573 | 5.374389 | 2.814591 | -1.70104 | 1 |
| Tnfrsf12a | 7.095724 | 9.91409  | 8.429849 | 9.17197  | 2.818366 | 1.334125 | 1 |
| Lmnbl1    | 5.513123 | 8.332178 | 7.484227 | 7.908203 | 2.819055 | 1.971104 | 1 |
|           | 2.943094 | 5.762901 | 5.772517 | 5.767709 | 2.819807 | 2.829423 | 2 |
| Gpr182    | 5.566916 | 8.388543 | 7.038763 | 7.713653 | 2.821627 | 1.471847 | 1 |
| Tgm2      | 11.14137 | 13.96515 | 12.779   | 13.37208 | 2.823782 | 1.637627 | 1 |
|           | 8.216266 | 11.04212 | 9.625147 | 10.33363 | 2.825853 | 1.408881 | 1 |
| Tlr4      | 6.616632 | 9.442904 | 8.839339 | 9.141122 | 2.826273 | 2.222708 | 2 |
| Clec4a3   | 7.123189 | 9.949692 | 9.515844 | 9.732768 | 2.826503 | 2.392655 | 2 |
| Tagln2    | 12.0055  | 14.83315 | 14.47763 | 14.65539 | 2.827655 | 2.472137 | 2 |
|           | 4.416843 | 7.247747 | 7.248626 | 7.248187 | 2.830905 | 2.831783 | 2 |
| Ms4a14    | 4.454127 | 7.285169 | 7.640966 | 7.463067 | 2.831042 | 3.186838 | 2 |
| Calca     | 2.546019 | 5.378652 | 4.785599 | 5.082125 | 2.832632 | 2.23958  | 2 |
| Cp        | 9.137124 | 11.97097 | 10.05213 | 11.01155 | 2.833848 | 0.915005 | 1 |
| Figl1     | 7.69767  | 10.53483 | 10.26513 | 10.39998 | 2.837156 | 2.567455 | 2 |
| C3        | 7.216051 | 10.05526 | 9.249743 | 9.652501 | 2.839209 | 2.033692 | 2 |
| Ncmap     | 6.046193 | 8.88787  | 5.662023 | 7.274947 | 2.841677 | -0.38417 | 1 |
| Cdk1      | 2.321946 | 5.166277 | 4.98146  | 5.073869 | 2.844331 | 2.659514 | 2 |
| Aspg      | 10.02511 | 12.87017 | 12.623   | 12.74658 | 2.845065 | 2.597888 | 2 |
| Spink2    | 2.321946 | 5.170019 | 5.925524 | 5.547772 | 2.848073 | 3.603578 | 2 |
| Gm14461   | 2.321946 | 5.171264 | 6.138123 | 5.654694 | 2.849318 | 3.816177 | 2 |
| 1100001Gz | 2.787756 | 5.637193 | 4.618994 | 5.128093 | 2.849437 | 1.831238 | 1 |
| Figl1     | 7.664516 | 10.51406 | 10.44724 | 10.48065 | 2.84954  | 2.782725 | 2 |
| Tap2      | 8.406134 | 11.25602 | 9.91542  | 10.58572 | 2.849887 | 1.509286 | 1 |
| Usp49     | 2.321946 | 5.173273 | 4.923967 | 5.04862  | 2.851327 | 2.602021 | 2 |
| LOC101056 | 5.76033  | 8.615665 | 7.614086 | 8.114875 | 2.855335 | 1.853756 | 1 |
| Lhx1      | 3.505801 | 6.362848 | 6.347245 | 6.355046 | 2.857047 | 2.841444 | 2 |
| Vwf       | 10.46786 | 13.33323 | 12.24631 | 12.78977 | 2.865369 | 1.778458 | 1 |
| Ccna2     | 8.712215 | 11.57824 | 11.24321 | 11.41072 | 2.866022 | 2.530994 | 2 |
| Ect2      | 6.966307 | 9.840227 | 10.2008  | 10.02051 | 2.87392  | 3.234495 | 2 |
| Synpo     | 3.649674 | 6.523871 | 5.058438 | 5.791155 | 2.874198 | 1.408765 | 1 |
| Pyhin1    | 7.220614 | 10.09487 | 8.652162 | 9.373517 | 2.874259 | 1.431549 | 1 |
| Lyp1a1    | 2.959559 | 5.837471 | 4.627158 | 5.232314 | 2.877911 | 1.667599 | 1 |

|           |          |          |          |          |          |          |   |
|-----------|----------|----------|----------|----------|----------|----------|---|
| Rufy4     | 3.702862 | 6.581989 | 6.39597  | 6.48898  | 2.879127 | 2.693108 | 2 |
| Shisa3    | 4.995571 | 7.875767 | 4.856586 | 6.366176 | 2.880196 | -0.13899 | 1 |
| Serping1  | 6.699351 | 9.581718 | 9.060717 | 9.321218 | 2.882367 | 2.361366 | 2 |
| Slc7a7    | 10.07131 | 12.95522 | 12.54279 | 12.749   | 2.883912 | 2.471475 | 2 |
| Ptpn6     | 7.486398 | 10.37294 | 10.06437 | 10.21865 | 2.886538 | 2.577975 | 2 |
| Plk1      | 7.445884 | 10.33404 | 9.785272 | 10.05966 | 2.888156 | 2.339388 | 2 |
| Klk1b26   | 4.088598 | 6.984316 | 8.183973 | 7.584145 | 2.895718 | 4.095375 | 2 |
| Pdcd1     | 4.534914 | 7.43386  | 7.284892 | 7.359376 | 2.898947 | 2.749978 | 2 |
|           | 2.505062 | 5.405178 | 4.68017  | 5.042674 | 2.900116 | 2.175108 | 2 |
| Rad54l    | 6.154154 | 9.055629 | 8.41621  | 8.73592  | 2.901475 | 2.262056 | 2 |
| I830012O1 | 6.08588  | 8.987916 | 7.851051 | 8.419484 | 2.902036 | 1.765171 | 1 |
| Cdca7l    | 2.321946 | 5.231172 | 4.338569 | 4.78487  | 2.909226 | 2.016623 | 2 |
| Lhx9      | 5.17725  | 8.087119 | 9.479104 | 8.783112 | 2.909869 | 4.301854 | 2 |
| AU022793  | 5.230288 | 8.140188 | 8.130693 | 8.135441 | 2.9099   | 2.900405 | 2 |
| Klri1     | 2.321946 | 5.234595 | 4.247231 | 4.740913 | 2.912649 | 1.925284 | 1 |
| Sdc1      | 3.174863 | 6.088463 | 6.107863 | 6.098163 | 2.9136   | 2.933001 | 2 |
| Cd14      | 8.722906 | 11.63709 | 10.33397 | 10.98553 | 2.914187 | 1.61106  | 1 |
| Aurka     | 7.526245 | 10.44288 | 10.13772 | 10.2903  | 2.916634 | 2.611477 | 2 |
| Arhgap11a | 3.179065 | 6.097931 | 5.7396   | 5.918766 | 2.918866 | 2.560535 | 2 |
| Tgfbr2    | 2.321946 | 5.241811 | 4.654325 | 4.948068 | 2.919865 | 2.332378 | 2 |
|           | 7.822046 | 10.74221 | 8.343967 | 9.543087 | 2.920161 | 0.521921 | 1 |
| Slc9a4    | 6.38804  | 9.310372 | 9.61774  | 9.464056 | 2.922332 | 3.2297   | 2 |
| Slc2a9    | 5.571268 | 8.497167 | 8.805074 | 8.651121 | 2.925899 | 3.233806 | 2 |
| Socs3     | 10.55631 | 13.4829  | 12.36122 | 12.92206 | 2.926582 | 1.804909 | 1 |
| 9530020I1 | 2.321946 | 5.252234 | 3.760188 | 4.506211 | 2.930288 | 1.438242 | 1 |
| Il1r2     | 4.837778 | 7.770181 | 6.877423 | 7.323802 | 2.932403 | 2.039645 | 2 |
| Mgst1     | 8.961952 | 11.89508 | 10.9746  | 11.43484 | 2.933131 | 2.012646 | 2 |
| Vps13c    | 2.866789 | 5.802172 | 4.627726 | 5.214949 | 2.935383 | 1.760937 | 1 |
| Cyp2a4    | 2.606917 | 5.543874 | 7.334305 | 6.43909  | 2.936957 | 4.727388 | 2 |
|           | 2.358202 | 5.300688 | 4.822275 | 5.061482 | 2.942487 | 2.464073 | 2 |
|           | 2.325448 | 5.268809 | 4.489588 | 4.879199 | 2.943362 | 2.16414  | 2 |
| Acp5      | 7.52087  | 10.46572 | 10.5897  | 10.52771 | 2.94485  | 3.068829 | 2 |
| Ly86      | 12.65599 | 15.60158 | 15.60439 | 15.60298 | 2.945588 | 2.948397 | 2 |
| Gm5127    | 4.772939 | 7.71973  | 7.120182 | 7.419956 | 2.946791 | 2.347243 | 2 |
| Ly9       | 4.271308 | 7.220897 | 5.840158 | 6.530527 | 2.949589 | 1.56885  | 1 |
| Hells     | 4.891388 | 7.843141 | 6.920445 | 7.381793 | 2.951753 | 2.029057 | 2 |
| Clec4n    | 6.756911 | 9.708998 | 8.757812 | 9.233405 | 2.952087 | 2.000901 | 2 |
| Casp4     | 7.813279 | 10.77184 | 10.52403 | 10.64794 | 2.958561 | 2.710752 | 2 |
|           | 8.412012 | 11.37254 | 11.04298 | 11.20776 | 2.960525 | 2.630971 | 2 |
| P2ry6     | 9.743145 | 12.70429 | 12.2727  | 12.4885  | 2.961144 | 2.529558 | 2 |
| Klk1b5    | 4.999754 | 7.96347  | 7.64801  | 7.80574  | 2.963716 | 2.648256 | 2 |
| Cdc20     | 9.682066 | 12.65069 | 12.56849 | 12.60959 | 2.968625 | 2.886419 | 2 |
| S100a6    | 11.57782 | 14.54741 | 14.26435 | 14.40588 | 2.969586 | 2.686525 | 2 |
| Pros1     | 8.400498 | 11.37027 | 11.08172 | 11.22599 | 2.969768 | 2.681224 | 2 |
| Gins2     | 4.166168 | 7.136321 | 6.003864 | 6.570093 | 2.970153 | 1.837696 | 1 |
| Hmgb2     | 10.4252  | 13.40178 | 12.99885 | 13.20032 | 2.976579 | 2.573653 | 2 |
| Ndst4     | 3.095123 | 6.074969 | 6.774899 | 6.424934 | 2.979847 | 3.679776 | 2 |

|            |          |          |          |          |          |          |   |
|------------|----------|----------|----------|----------|----------|----------|---|
|            | 3.696886 | 6.677879 | 6.116613 | 6.397246 | 2.980994 | 2.419727 | 2 |
|            | 2.517319 | 5.500823 | 4.918483 | 5.209653 | 2.983504 | 2.401165 | 2 |
| 1810019J1  | 3.754724 | 6.738617 | 6.764682 | 6.751649 | 2.983893 | 3.009959 | 2 |
| Slc37a2    | 7.427994 | 10.41341 | 10.36614 | 10.38978 | 2.98542  | 2.938147 | 2 |
| Dnm2       | 5.012667 | 7.998303 | 4.928787 | 6.463545 | 2.985637 | -0.08388 | 1 |
| Pabpc1l2b- | 2.321946 | 5.308308 | 4.399972 | 4.85414  | 2.986362 | 2.078026 | 2 |
| Arl14epl   | 2.321946 | 5.308532 | 6.708819 | 6.008676 | 2.986586 | 4.386873 | 2 |
| Fcer1g     | 11.84656 | 14.83651 | 14.44425 | 14.64038 | 2.989946 | 2.597691 | 2 |
| Vwf        | 2.598619 | 5.588663 | 5.020497 | 5.30458  | 2.990044 | 2.421879 | 2 |
| Ddx60      | 3.578757 | 6.571245 | 6.02135  | 6.296298 | 2.992488 | 2.442593 | 2 |
| Gpr114     | 6.164941 | 9.163844 | 9.76412  | 9.463982 | 2.998903 | 3.599179 | 2 |
| Sirpb1a    | 5.555936 | 8.559503 | 7.60594  | 8.082722 | 3.003567 | 2.050004 | 2 |
| Itga5      | 4.63809  | 7.642626 | 6.875596 | 7.259111 | 3.004536 | 2.237506 | 2 |
| Psemb8     | 7.062614 | 10.07074 | 9.190617 | 9.630678 | 3.008124 | 2.128003 | 2 |
| Plce1      | 4.183731 | 7.191879 | 6.739541 | 6.96571  | 3.008148 | 2.55581  | 2 |
| Cyba       | 11.00273 | 14.01146 | 13.93355 | 13.97251 | 3.008736 | 2.930827 | 2 |
| Slfm1      | 2.321946 | 5.331516 | 4.375899 | 4.853708 | 3.00957  | 2.053953 | 2 |
| Ccr1       | 3.249916 | 6.262001 | 5.699586 | 5.980794 | 3.012085 | 2.449671 | 2 |
| Gcnt1      | 5.427694 | 8.44066  | 8.08834  | 8.2645   | 3.012966 | 2.660646 | 2 |
| Tlr7       | 7.691278 | 10.70464 | 10.5193  | 10.61197 | 3.01336  | 2.828022 | 2 |
| Kl         | 5.115395 | 8.129675 | 7.777518 | 7.953597 | 3.01428  | 2.662124 | 2 |
| Nlrp1b     | 2.904004 | 5.918734 | 5.123407 | 5.521071 | 3.01473  | 2.219404 | 2 |
|            | 2.741761 | 5.758384 | 4.78221  | 5.270297 | 3.016623 | 2.04045  | 2 |
| Tpx2       | 2.321946 | 5.33858  | 5.08387  | 5.211225 | 3.016634 | 2.761923 | 2 |
| C3ar1      | 7.483077 | 10.50135 | 10.12252 | 10.31194 | 3.018275 | 2.639441 | 2 |
| Zfx        | 2.321946 | 5.342619 | 4.918596 | 5.130608 | 3.020673 | 2.59665  | 2 |
| Ifitm1     | 10.37148 | 13.39267 | 12.52585 | 12.95926 | 3.021186 | 2.154367 | 2 |
| 4930430D2  | 2.321946 | 5.343858 | 5.166844 | 5.255351 | 3.021912 | 2.844898 | 2 |
|            | 2.321946 | 5.349095 | 5.151416 | 5.250256 | 3.027149 | 2.82947  | 2 |
| Lrg1       | 8.793605 | 11.82183 | 9.978917 | 10.90037 | 3.028221 | 1.185312 | 1 |
|            | 5.828014 | 8.860883 | 6.980245 | 7.920564 | 3.032869 | 1.15223  | 1 |
| I830012O1  | 8.529009 | 11.56575 | 10.45092 | 11.00833 | 3.036738 | 1.921908 | 1 |
| Knstrn     | 7.917358 | 10.96336 | 11.19607 | 11.07972 | 3.046002 | 3.278716 | 2 |
| S100a4     | 9.520185 | 12.56702 | 12.78372 | 12.67537 | 3.046837 | 3.263539 | 2 |
| Cdca8      | 8.092925 | 11.14217 | 10.91191 | 11.02704 | 3.04924  | 2.818982 | 2 |
| Ccl5       | 6.467802 | 9.528563 | 10.25631 | 9.892436 | 3.060761 | 3.788506 | 2 |
| Csprs      | 4.829036 | 7.890479 | 7.788476 | 7.839478 | 3.061443 | 2.95944  | 2 |
| Fblim1     | 7.760047 | 10.82476 | 10.56436 | 10.69456 | 3.064715 | 2.804315 | 2 |
| Irgm1      | 5.377851 | 8.442719 | 7.397476 | 7.920097 | 3.064868 | 2.019626 | 2 |
| 2210406H1  | 3.64293  | 6.709518 | 7.262078 | 6.985798 | 3.066588 | 3.619148 | 2 |
| Acp5       | 7.674188 | 10.74184 | 10.98045 | 10.86114 | 3.067652 | 3.306259 | 2 |
| Morf4l2    | 2.953229 | 6.021194 | 4.493083 | 5.257138 | 3.067966 | 1.539854 | 1 |
| Ndc80      | 3.299782 | 6.369258 | 5.289308 | 5.829283 | 3.069475 | 1.989526 | 1 |
| Klrb1      | 3.749237 | 6.820675 | 4.021147 | 5.420911 | 3.071438 | 0.271911 | 1 |
| Pkd2l2     | 2.321946 | 5.393636 | 4.342273 | 4.867954 | 3.07169  | 2.020327 | 2 |
| Igfbpl1    | 3.101239 | 6.175608 | 6.368316 | 6.271962 | 3.07437  | 3.267078 | 2 |
| Casp4      | 7.408721 | 10.48531 | 10.20654 | 10.34593 | 3.076591 | 2.797822 | 2 |



|            |          |          |          |          |          |          |   |
|------------|----------|----------|----------|----------|----------|----------|---|
| Mcm3       | 9.332666 | 12.41487 | 11.80191 | 12.10839 | 3.082205 | 2.469243 | 2 |
| Ifitm6     | 5.055149 | 8.137602 | 7.532177 | 7.83489  | 3.082453 | 2.477028 | 2 |
| Tpte       | 2.321946 | 5.40445  | 7.344484 | 6.374467 | 3.082504 | 5.022538 | 2 |
| Nin        | 4.415362 | 7.498131 | 3.918621 | 5.708376 | 3.082769 | -0.49674 | 1 |
| Serpinf2   | 5.499979 | 8.583446 | 9.979999 | 9.281723 | 3.083467 | 4.48002  | 2 |
| Cd2        | 3.295087 | 6.381539 | 6.152197 | 6.266868 | 3.086452 | 2.857111 | 2 |
| Ugt1a10    | 2.321946 | 5.409359 | 5.003902 | 5.20663  | 3.087413 | 2.681955 | 2 |
| Gpr137b-p: | 7.295147 | 10.38456 | 10.66055 | 10.52256 | 3.089415 | 3.365407 | 2 |
| Mrgprb3    | 5.693022 | 8.782515 | 5.671224 | 7.226869 | 3.089493 | -0.0218  | 1 |
| Cd163l1    | 4.244596 | 7.334859 | 7.019381 | 7.17712  | 3.090263 | 2.774785 | 2 |
| Dennd2d    | 4.297605 | 7.388721 | 7.046214 | 7.217468 | 3.091116 | 2.748609 | 2 |
| BC055324   | 2.898338 | 5.990318 | 5.216245 | 5.603281 | 3.09198  | 2.317907 | 2 |
| Olfr435    | 3.082475 | 6.176555 | 6.645113 | 6.410834 | 3.09408  | 3.562638 | 2 |
| Gbp2b      | 4.37298  | 7.467937 | 7.977546 | 7.722741 | 3.094957 | 3.604566 | 2 |
| Cybrd1     | 7.91091  | 11.00595 | 11.55177 | 11.27886 | 3.095044 | 3.64086  | 2 |
| Htra4      | 2.321946 | 5.421029 | 5.984987 | 5.703008 | 3.099083 | 3.663041 | 2 |
| Bbx        | 2.409415 | 5.508781 | 7.295147 | 6.401964 | 3.099366 | 4.885733 | 2 |
| Ifitm1     | 10.47857 | 13.58463 | 12.67278 | 13.1287  | 3.106056 | 2.194208 | 2 |
| Ptgr1      | 8.791864 | 11.89979 | 11.8739  | 11.88685 | 3.107927 | 3.082036 | 2 |
| Nox4       | 5.128439 | 8.239284 | 7.722171 | 7.980728 | 3.110846 | 2.593733 | 2 |
| Il21r      | 5.342397 | 8.454106 | 8.001391 | 8.227749 | 3.111709 | 2.658994 | 2 |
| Ccdc109b   | 2.321946 | 5.43757  | 4.857794 | 5.147682 | 3.115624 | 2.535848 | 2 |
| Srebf2     | 6.332536 | 9.448509 | 8.862838 | 9.155674 | 3.115973 | 2.530302 | 2 |
| Pdpn       | 11.67404 | 14.7931  | 14.05954 | 14.42632 | 3.11906  | 2.385505 | 2 |
| Foxr1      | 4.534584 | 7.65437  | 5.324652 | 6.489511 | 3.119786 | 0.790068 | 1 |
| Col3a1     | 9.740288 | 12.86125 | 12.67929 | 12.77027 | 3.120957 | 2.939005 | 2 |
| Fanci      | 6.596724 | 9.719708 | 9.66087  | 9.690289 | 3.122984 | 3.064146 | 2 |
|            | 5.262799 | 8.386634 | 2.322894 | 5.354764 | 3.123835 | -2.9399  | 1 |
| Podxl      | 3.4537   | 6.577828 | 5.044042 | 5.810935 | 3.124127 | 1.590341 | 1 |
| Mpeg1      | 12.2727  | 15.39794 | 15.78583 | 15.59189 | 3.125238 | 3.513129 | 2 |
|            | 4.721934 | 7.848065 | 6.418017 | 7.133041 | 3.126131 | 1.696083 | 1 |
| Phf11b     | 7.728103 | 10.85428 | 10.35817 | 10.60623 | 3.126179 | 2.630069 | 2 |
| Gtse1      | 5.169694 | 8.296502 | 8.259638 | 8.27807  | 3.126808 | 3.089944 | 2 |
| C1qa       | 6.068324 | 9.19602  | 8.544719 | 8.87037  | 3.127696 | 2.476395 | 2 |
| Gsc2       | 2.684287 | 5.815333 | 4.0887   | 4.952017 | 3.131046 | 1.404413 | 1 |
| Ccnb2      | 8.455268 | 11.58667 | 11.53285 | 11.55976 | 3.131404 | 3.077581 | 2 |
| Cdca8      | 4.556666 | 7.695056 | 8.185311 | 7.940184 | 3.13839  | 3.628645 | 2 |
| Gusb       | 9.142736 | 12.28318 | 11.96232 | 12.12275 | 3.140439 | 2.819587 | 2 |
| Cdc6       | 3.244488 | 6.385851 | 5.548697 | 5.967274 | 3.141363 | 2.304209 | 2 |
| Irx3       | 5.456046 | 8.599763 | 9.23132  | 8.915542 | 3.143717 | 3.775274 | 2 |
| Igfbp3     | 6.167759 | 9.311795 | 7.60056  | 8.456177 | 3.144036 | 1.4328   | 1 |
| Itln1      | 2.321946 | 5.47119  | 5.012807 | 5.241999 | 3.149244 | 2.690861 | 2 |
| Mcm3       | 10.3235  | 13.47465 | 12.77614 | 13.12539 | 3.151147 | 2.45264  | 2 |
| Fibcd1     | 2.673976 | 5.825663 | 4.626267 | 5.225965 | 3.151686 | 1.95229  | 1 |
| Gpr84      | 9.378656 | 12.53411 | 12.96041 | 12.74726 | 3.155455 | 3.581757 | 2 |
| Itgax      | 5.265178 | 8.421464 | 9.136261 | 8.778863 | 3.156286 | 3.871083 | 2 |
| Efemp2     | 9.207022 | 12.36572 | 11.36179 | 11.86375 | 3.158694 | 2.154769 | 2 |

|            |          |          |          |          |          |          |   |
|------------|----------|----------|----------|----------|----------|----------|---|
| Msn        | 12.23284 | 15.39547 | 14.82514 | 15.11031 | 3.162629 | 2.592299 | 2 |
| D13Ertd60i | 2.697691 | 5.862544 | 4.715889 | 5.289216 | 3.164853 | 2.018198 | 2 |
| E2f8       | 7.226732 | 10.39611 | 10.10483 | 10.25047 | 3.169382 | 2.878102 | 2 |
| BC026585   | 2.321946 | 5.492926 | 5.219305 | 5.356115 | 3.17098  | 2.897359 | 2 |
|            | 3.155894 | 6.331957 | 5.419248 | 5.875602 | 3.176063 | 2.263354 | 2 |
| Erich2     | 2.321946 | 5.498898 | 5.208934 | 5.353916 | 3.176952 | 2.886988 | 2 |
| Ifi30      | 7.595956 | 10.77507 | 10.4876  | 10.63133 | 3.179109 | 2.89164  | 2 |
| Anxa1      | 7.401349 | 10.5818  | 10.07828 | 10.33004 | 3.180453 | 2.676931 | 2 |
| Dnajc5b    | 2.321946 | 5.503364 | 4.257223 | 4.880293 | 3.181418 | 1.935277 | 1 |
| Frrs1      | 4.914738 | 8.096851 | 7.744962 | 7.920907 | 3.182113 | 2.830224 | 2 |
| Slc43a1    | 2.337215 | 5.526508 | 4.93989  | 5.233199 | 3.189294 | 2.602676 | 2 |
| Gm14005    | 4.996701 | 8.193831 | 7.756537 | 7.975184 | 3.19713  | 2.759836 | 2 |
| LOC101056  | 2.957729 | 6.160446 | 5.794636 | 5.977541 | 3.202717 | 2.836907 | 2 |
| Tssk5      | 5.191509 | 8.397242 | 4.456891 | 6.427066 | 3.205733 | -0.73462 | 1 |
| Slfn8      | 5.565102 | 8.773084 | 7.885659 | 8.329372 | 3.207982 | 2.320557 | 2 |
| Mrc1       | 8.989858 | 12.19958 | 11.25172 | 11.72565 | 3.209725 | 2.261858 | 2 |
| Kras       | 4.992615 | 8.208997 | 5.506985 | 6.857991 | 3.216382 | 0.51437  | 1 |
| Grn        | 9.499639 | 12.72233 | 12.33589 | 12.52911 | 3.222687 | 2.836253 | 2 |
| Mpeg1      | 3.571528 | 6.794476 | 7.134329 | 6.964402 | 3.222947 | 3.562801 | 2 |
| Slc14a1    | 8.452988 | 11.67652 | 11.67557 | 11.67604 | 3.223531 | 3.222583 | 2 |
| Arhgef39   | 7.032575 | 10.25866 | 9.869105 | 10.06388 | 3.22608  | 2.83653  | 2 |
| Cdhr1      | 5.521994 | 8.750097 | 8.091164 | 8.420631 | 3.228103 | 2.56917  | 2 |
| Cenpi      | 4.80595  | 8.037271 | 8.176682 | 8.106977 | 3.231321 | 3.370732 | 2 |
|            | 2.321946 | 5.555626 | 6.429124 | 5.992375 | 3.23368  | 4.107178 | 2 |
| Gbp6       | 5.159382 | 8.395539 | 7.394454 | 7.894996 | 3.236157 | 2.235072 | 2 |
| Gm3776     | 5.514117 | 8.751311 | 7.011992 | 7.881652 | 3.237194 | 1.497875 | 1 |
| BC094916   | 2.321946 | 5.564619 | 4.848547 | 5.206583 | 3.242673 | 2.5266   | 2 |
|            | 2.365593 | 5.608565 | 5.051904 | 5.330234 | 3.242972 | 2.686311 | 2 |
| Vav1       | 10.00439 | 13.2479  | 12.79419 | 13.02104 | 3.243509 | 2.789802 | 2 |
| Phf8       | 4.249795 | 7.495159 | 4.290892 | 5.893025 | 3.245364 | 0.041097 | 1 |
| Aoc1       | 2.583546 | 5.830427 | 5.640747 | 5.735587 | 3.246881 | 3.057201 | 2 |
| Cpa3       | 3.099992 | 6.348159 | 5.752384 | 6.050271 | 3.248167 | 2.652391 | 2 |
| Cebpd      | 11.40631 | 14.65762 | 13.52738 | 14.0925  | 3.251312 | 2.121076 | 2 |
| Tyms-ps    | 7.438386 | 10.69107 | 10.02817 | 10.35962 | 3.252686 | 2.589786 | 2 |
| Asf1b      | 7.340609 | 10.59855 | 9.989936 | 10.29424 | 3.257936 | 2.649327 | 2 |
| Nhlh2      | 2.321946 | 5.581562 | 8.826373 | 7.203968 | 3.259616 | 6.504427 | 2 |
| Ifit1      | 8.108786 | 11.37081 | 10.7478  | 11.0593  | 3.262019 | 2.639011 | 2 |
| Tbxas1     | 7.860695 | 11.13532 | 10.79921 | 10.96727 | 3.274627 | 2.938519 | 2 |
|            | 4.211523 | 7.492584 | 5.492302 | 6.492443 | 3.281061 | 1.280779 | 1 |
| Gm14548    | 5.12549  | 8.406854 | 7.572583 | 7.989719 | 3.281364 | 2.447093 | 2 |
| Tfec       | 3.540649 | 6.830807 | 6.378501 | 6.604654 | 3.290158 | 2.837852 | 2 |
| Ska3       | 3.122252 | 6.415905 | 5.903292 | 6.159598 | 3.293653 | 2.78104  | 2 |
| Mrps6      | 11.24105 | 14.54068 | 13.52235 | 14.03152 | 3.299638 | 2.281307 | 2 |
| Mmp8       | 2.321946 | 5.625452 | 4.93975  | 5.282601 | 3.303506 | 2.617804 | 2 |
| Rac2       | 8.673631 | 11.9773  | 11.50403 | 11.74066 | 3.303673 | 2.830395 | 2 |
| Csf2rb2    | 8.417354 | 11.728   | 11.50059 | 11.6143  | 3.310648 | 3.083238 | 2 |
| Cxcr4      | 5.930741 | 9.242377 | 9.149147 | 9.195762 | 3.311636 | 3.218406 | 2 |

|           |          |          |          |          |          |          |   |
|-----------|----------|----------|----------|----------|----------|----------|---|
| Olr1      | 2.321946 | 5.633665 | 5.489652 | 5.561659 | 3.311719 | 3.167706 | 2 |
|           | 4.807635 | 8.121389 | 6.871612 | 7.496501 | 3.313754 | 2.063977 | 2 |
| Btk       | 5.525544 | 8.840108 | 8.301535 | 8.570822 | 3.314564 | 2.775991 | 2 |
| Tpx2      | 7.093352 | 10.40917 | 10.35726 | 10.38322 | 3.315822 | 3.263904 | 2 |
| Mefv      | 5.276728 | 8.593209 | 7.527054 | 8.060132 | 3.316481 | 2.250326 | 2 |
| Il31ra    | 2.321946 | 5.642633 | 4.663942 | 5.153288 | 3.320687 | 2.341996 | 2 |
| Slc30a7   | 3.781933 | 7.103555 | 5.405746 | 6.25465  | 3.321622 | 1.623813 | 1 |
| Cyp1b1    | 7.894808 | 11.21708 | 10.57932 | 10.8982  | 3.322273 | 2.684508 | 2 |
| Drd5      | 3.62921  | 6.952254 | 7.376988 | 7.164621 | 3.323044 | 3.747778 | 2 |
| Anxa2     | 12.03722 | 15.36204 | 14.81135 | 15.08669 | 3.324821 | 2.774128 | 2 |
| Cdc6      | 4.284235 | 7.61128  | 6.740776 | 7.176028 | 3.327045 | 2.456541 | 2 |
| Il18r1    | 2.330458 | 5.657925 | 5.393987 | 5.525956 | 3.327467 | 3.063529 | 2 |
| Ifi35     | 4.007817 | 7.337668 | 5.970246 | 6.653957 | 3.329851 | 1.962429 | 1 |
| Sostdc1   | 5.130609 | 8.461699 | 6.780854 | 7.621277 | 3.33109  | 1.650245 | 1 |
| Slc15a3   | 6.074432 | 9.406772 | 8.610992 | 9.008882 | 3.33234  | 2.53656  | 2 |
|           | 2.321946 | 5.658108 | 4.273703 | 4.965906 | 3.336162 | 1.951757 | 1 |
|           | 4.991441 | 8.33056  | 5.301429 | 6.815995 | 3.339119 | 0.309988 | 1 |
| Emilin2   | 9.09878  | 12.4391  | 11.4638  | 11.95145 | 3.340315 | 2.365017 | 2 |
| Clec4a1   | 6.979409 | 10.32382 | 9.341896 | 9.832856 | 3.344407 | 2.362487 | 2 |
|           | 3.480834 | 6.826603 | 4.388386 | 5.607495 | 3.34577  | 0.907552 | 1 |
| Nlrc5     | 7.089986 | 10.43645 | 9.728804 | 10.08263 | 3.346467 | 2.638818 | 2 |
| Npl       | 6.851212 | 10.20052 | 9.414489 | 9.807506 | 3.34931  | 2.563277 | 2 |
| Lrtm1     | 2.414846 | 5.768651 | 4.565116 | 5.166883 | 3.353804 | 2.15027  | 2 |
| Nox4      | 4.313024 | 7.66997  | 7.160434 | 7.415202 | 3.356946 | 2.84741  | 2 |
| Slc1a5    | 4.498509 | 7.865109 | 5.351156 | 6.608133 | 3.3666   | 0.852647 | 1 |
| BC100530  | 4.148372 | 7.516121 | 5.63138  | 6.573751 | 3.36775  | 1.483008 | 1 |
| G3bp1     | 2.321946 | 5.698688 | 4.625771 | 5.16223  | 3.376742 | 2.303825 | 2 |
| Orc1      | 2.510046 | 5.888154 | 5.585737 | 5.736946 | 3.378109 | 3.075692 | 2 |
| Iqgap3    | 4.860908 | 8.244672 | 8.000334 | 8.122503 | 3.383764 | 3.139426 | 2 |
| Fabp4     | 6.039343 | 9.424171 | 10.0012  | 9.712684 | 3.384828 | 3.961855 | 2 |
| Krt18     | 4.58099  | 7.971079 | 6.716176 | 7.343628 | 3.390089 | 2.135186 | 2 |
| Klk6      | 10.09993 | 13.49685 | 13.33511 | 13.41598 | 3.396917 | 3.235179 | 2 |
| Saa2      | 3.554331 | 6.951817 | 6.133688 | 6.542753 | 3.397486 | 2.579357 | 2 |
| 2200002DC | 4.88151  | 8.286984 | 6.768304 | 7.527644 | 3.405474 | 1.886794 | 1 |
| Oas1f     | 7.393441 | 10.80476 | 10.2298  | 10.51728 | 3.411316 | 2.836357 | 2 |
| Ckap2l    | 2.321946 | 5.735497 | 5.308532 | 5.522014 | 3.41355  | 2.986586 | 2 |
| Sgol2     | 4.12026  | 7.535123 | 7.382104 | 7.458614 | 3.414863 | 3.261844 | 2 |
| Fcrls     | 8.265595 | 11.68389 | 11.37451 | 11.5292  | 3.418293 | 3.10891  | 2 |
| Csf2rb    | 8.424839 | 11.84362 | 11.77216 | 11.80789 | 3.418778 | 3.347318 | 2 |
| Mfsd1     | 2.797661 | 6.221994 | 5.40368  | 5.812837 | 3.424333 | 2.606019 | 2 |
| 2010015L0 | 4.050494 | 7.48225  | 4.842548 | 6.162399 | 3.431756 | 0.792055 | 1 |
| Kntc1     | 6.23554  | 9.673799 | 9.444979 | 9.559389 | 3.438259 | 3.209439 | 2 |
| Ifitm3    | 11.23547 | 14.67406 | 13.67728 | 14.17567 | 3.438588 | 2.441808 | 2 |
| Col6a5    | 2.321946 | 5.761632 | 5.029671 | 5.395652 | 3.439686 | 2.707725 | 2 |
| Naip2     | 5.866427 | 9.312918 | 9.343237 | 9.328078 | 3.446491 | 3.47681  | 2 |
| H2-Ab1    | 10.47106 | 13.92485 | 13.73119 | 13.82802 | 3.453786 | 3.260122 | 2 |
| Acmsd     | 2.321946 | 5.777795 | 4.778735 | 5.278265 | 3.455849 | 2.456789 | 2 |

|          |          |          |          |          |          |          |   |
|----------|----------|----------|----------|----------|----------|----------|---|
| Mis18bp1 | 4.049686 | 7.509829 | 7.778891 | 7.64436  | 3.460143 | 3.729205 | 2 |
| Napsa    | 3.045538 | 6.512492 | 4.94746  | 5.729976 | 3.466954 | 1.901922 | 1 |
| Magt1    | 4.659591 | 8.127984 | 7.884536 | 8.00626  | 3.468393 | 3.224945 | 2 |
|          | 2.540056 | 6.016891 | 6.521352 | 6.269121 | 3.476835 | 3.981296 | 2 |
| Gm13088  | 2.329449 | 5.807078 | 7.945434 | 6.876256 | 3.47763  | 5.615985 | 2 |
| Fcgr2b   | 9.060717 | 12.5391  | 12.09521 | 12.31716 | 3.478385 | 3.034493 | 2 |
| H2-BI    | 3.37166  | 6.871121 | 5.581082 | 6.226101 | 3.499461 | 2.209423 | 2 |
| Lat2     | 6.47508  | 9.978583 | 9.024772 | 9.501678 | 3.503503 | 2.549692 | 2 |
| Tgfb1    | 10.21908 | 13.72289 | 12.53272 | 13.1278  | 3.50381  | 2.313641 | 2 |
| Anp32e   | 2.321946 | 5.826811 | 4.522245 | 5.174528 | 3.504865 | 2.200299 | 2 |
| Emilin1  | 3.281767 | 6.790494 | 5.743714 | 6.267104 | 3.508727 | 2.461947 | 2 |
| Fermt3   | 3.92893  | 7.44122  | 5.795171 | 6.618196 | 3.51229  | 1.866241 | 1 |
| Il19     | 3.204206 | 6.716835 | 5.009732 | 5.863283 | 3.512629 | 1.805526 | 1 |
| Sdc4     | 8.094805 | 11.60989 | 10.73505 | 11.17247 | 3.515085 | 2.640244 | 2 |
| Lbp      | 5.250346 | 8.769854 | 7.539432 | 8.154643 | 3.519508 | 2.289086 | 2 |
| Tmem252  | 6.693488 | 10.21518 | 8.487177 | 9.351178 | 3.521691 | 1.793689 | 1 |
| Fcgr3    | 7.180552 | 10.70328 | 9.986622 | 10.34495 | 3.522727 | 2.80607  | 2 |
| Ecel1    | 9.594521 | 13.1193  | 13.32634 | 13.22282 | 3.524775 | 3.731816 | 2 |
| Lgals1   | 12.50726 | 16.03276 | 15.89909 | 15.96593 | 3.525497 | 3.391828 | 2 |
| Gm4610   | 2.599964 | 6.127656 | 6.488164 | 6.30791  | 3.527691 | 3.8882   | 2 |
| Gm5068   | 8.480969 | 12.01172 | 11.01928 | 11.5155  | 3.53075  | 2.538315 | 2 |
| Cybb     | 2.801646 | 6.34405  | 6.075443 | 6.209747 | 3.542404 | 3.273797 | 2 |
| Dhrs1    | 6.922026 | 10.46458 | 10.19284 | 10.32871 | 3.542556 | 3.27081  | 2 |
| Adam8    | 10.79483 | 14.34774 | 12.97095 | 13.65934 | 3.552916 | 2.176117 | 2 |
| Myo1f    | 8.006792 | 11.55972 | 11.83587 | 11.69779 | 3.552928 | 3.829074 | 2 |
| Cd72     | 6.944526 | 10.49952 | 9.682066 | 10.09079 | 3.554994 | 2.73754  | 2 |
| S100a4   | 9.69438  | 13.25856 | 13.60248 | 13.43052 | 3.564181 | 3.908099 | 2 |
| Dock8    | 4.21834  | 7.78779  | 7.09551  | 7.44165  | 3.56945  | 2.877169 | 2 |
|          | 3.363749 | 6.936159 | 6.34405  | 6.640105 | 3.57241  | 2.980301 | 2 |
| Fam101a  | 6.248532 | 9.822641 | 9.278243 | 9.550442 | 3.574109 | 3.029711 | 2 |
| Gm9706   | 6.968657 | 10.54348 | 9.960603 | 10.25204 | 3.57482  | 2.991947 | 2 |
| Myo1g    | 7.424291 | 10.99969 | 10.33709 | 10.66839 | 3.575403 | 2.9128   | 2 |
| Kif2c    | 2.321946 | 5.897438 | 5.461241 | 5.679339 | 3.575492 | 3.139295 | 2 |
| Qser1    | 2.642448 | 6.223946 | 7.839346 | 7.031646 | 3.581498 | 5.196898 | 2 |
| Ncf4     | 8.766962 | 12.35176 | 11.98383 | 12.1678  | 3.584799 | 3.216868 | 2 |
|          | 2.321946 | 5.909446 | 6.717909 | 6.313678 | 3.5875   | 4.395963 | 2 |
| Gm4841   | 2.520084 | 6.110665 | 5.418469 | 5.764567 | 3.590581 | 2.898384 | 2 |
| Sirpb1a  | 3.847278 | 7.438386 | 6.247551 | 6.842968 | 3.591108 | 2.400274 | 2 |
| Sirpb1a  | 5.098988 | 8.699958 | 7.123189 | 7.911574 | 3.60097  | 2.024202 | 2 |
| Chaf1b   | 6.465589 | 10.07828 | 9.657125 | 9.867702 | 3.612691 | 3.191536 | 2 |
| Spc24    | 3.936947 | 7.549935 | 6.792738 | 7.171337 | 3.612988 | 2.855791 | 2 |
| H2-Ab1   | 10.04302 | 13.65646 | 13.41926 | 13.53786 | 3.613439 | 3.376244 | 2 |
| Fam159a  | 2.321946 | 5.939297 | 5.949422 | 5.94436  | 3.617351 | 3.627476 | 2 |
| Lrrc25   | 5.415745 | 9.035618 | 8.360232 | 8.697925 | 3.619873 | 2.944487 | 2 |
| Olfr982  | 2.321946 | 5.943352 | 5.377574 | 5.660463 | 3.621406 | 3.055628 | 2 |
| Gdf15    | 3.735275 | 7.363439 | 7.191518 | 7.277479 | 3.628164 | 3.456244 | 2 |
| Apobec1  | 9.886222 | 13.51556 | 12.78789 | 13.15172 | 3.629337 | 2.901663 | 2 |

|           |          |          |          |          |          |          |   |
|-----------|----------|----------|----------|----------|----------|----------|---|
| Hp        | 5.435755 | 9.06672  | 7.330418 | 8.198569 | 3.630965 | 1.894662 | 1 |
| Mdfic     | 6.077089 | 9.709213 | 9.390068 | 9.549641 | 3.632124 | 3.312979 | 2 |
| Slamf6    | 3.631763 | 7.264806 | 7.740763 | 7.502785 | 3.633043 | 4.109    | 2 |
| Hist1h2ae | 2.321946 | 5.955907 | 5.767331 | 5.861619 | 3.633961 | 3.445385 | 2 |
| Camk2d    | 3.129705 | 6.764204 | 6.007324 | 6.385764 | 3.634499 | 2.877619 | 2 |
| Osmr      | 9.905126 | 13.54208 | 12.86125 | 13.20166 | 3.636949 | 2.956119 | 2 |
| Cenph     | 3.111737 | 6.752191 | 6.176139 | 6.464165 | 3.640454 | 3.064402 | 2 |
| Ckap2     | 4.075973 | 7.718607 | 7.972498 | 7.845553 | 3.642634 | 3.896526 | 2 |
| Defa-rs7  | 4.635049 | 8.279408 | 10.64309 | 9.461248 | 3.644359 | 6.008039 | 2 |
| Rgs1      | 6.451155 | 10.09793 | 9.348515 | 9.723223 | 3.646775 | 2.89736  | 2 |
|           | 2.321946 | 5.975726 | 5.489089 | 5.732407 | 3.65378  | 3.167143 | 2 |
| Aspm      | 6.517768 | 10.17713 | 10.48443 | 10.33078 | 3.65936  | 3.966658 | 2 |
| Anxa3     | 6.612155 | 10.28574 | 9.064946 | 9.675343 | 3.673585 | 2.452791 | 2 |
| Apob      | 2.321946 | 5.997082 | 6.245898 | 6.12149  | 3.675136 | 3.923952 | 2 |
| Kif4      | 3.687816 | 7.365792 | 6.623889 | 6.99484  | 3.677976 | 2.936073 | 2 |
| Kcne2     | 4.919797 | 8.600668 | 6.125923 | 7.363295 | 3.680871 | 1.206126 | 1 |
| Ube2c     | 5.292947 | 8.975958 | 8.042814 | 8.509386 | 3.683011 | 2.749867 | 2 |
| Irg1      | 3.265271 | 6.954339 | 5.964497 | 6.459418 | 3.689067 | 2.699226 | 2 |
| Esco2     | 4.267998 | 7.957809 | 6.784015 | 7.370912 | 3.689811 | 2.516017 | 2 |
| Cpsf4l    | 4.292265 | 7.982184 | 6.749516 | 7.36585  | 3.689919 | 2.457251 | 2 |
| Vmn2r62   | 3.28331  | 6.978177 | 6.68661  | 6.832394 | 3.694867 | 3.4033   | 2 |
| S100a11   | 9.934695 | 13.62983 | 12.59847 | 13.11415 | 3.695136 | 2.66378  | 2 |
| Prss46    | 4.038182 | 7.737604 | 8.064374 | 7.900989 | 3.699421 | 4.026192 | 2 |
| Cfb       | 4.336679 | 8.038406 | 7.416395 | 7.7274   | 3.701727 | 3.079716 | 2 |
| Syce3     | 2.92133  | 6.625422 | 5.130684 | 5.878053 | 3.704092 | 2.209355 | 2 |
| Gm10639   | 5.463032 | 9.17371  | 7.628385 | 8.401048 | 3.710678 | 2.165353 | 2 |
| Bst2      | 7.243444 | 10.95478 | 9.491475 | 10.22313 | 3.711333 | 2.248031 | 2 |
| Nuf2      | 3.515771 | 7.228958 | 6.851058 | 7.040008 | 3.713187 | 3.335287 | 2 |
| Mcm6      | 9.806201 | 13.52627 | 13.20487 | 13.36557 | 3.720065 | 3.398667 | 2 |
| Lrr1      | 4.684946 | 8.410601 | 7.731742 | 8.071172 | 3.725655 | 3.046796 | 2 |
|           | 4.773157 | 8.50009  | 7.112151 | 7.806121 | 3.726933 | 2.338994 | 2 |
| Kif15     | 2.321946 | 6.050355 | 4.97095  | 5.510652 | 3.728408 | 2.649004 | 2 |
| Espl1     | 2.517889 | 6.249337 | 6.130902 | 6.190119 | 3.731447 | 3.613013 | 2 |
| Avpr1b    | 2.486144 | 6.220684 | 7.135352 | 6.678018 | 3.73454  | 4.649208 | 2 |
| Ctsc      | 9.811364 | 13.5467  | 12.85558 | 13.20114 | 3.735336 | 3.044212 | 2 |
| Serpinb5  | 2.32312  | 6.061918 | 6.029904 | 6.045911 | 3.738798 | 3.706784 | 2 |
| Kif20a    | 6.632224 | 10.38744 | 10.23959 | 10.31351 | 3.755214 | 3.607361 | 2 |
|           | 4.216204 | 7.976558 | 4.512503 | 6.24453  | 3.760354 | 0.296299 | 1 |
| Ermard    | 8.367313 | 12.13208 | 11.43376 | 11.78292 | 3.764768 | 3.066443 | 2 |
| LOC101056 | 3.994441 | 7.765626 | 5.867003 | 6.816315 | 3.771185 | 1.872562 | 1 |
| Ccdc40    | 2.408384 | 6.182025 | 4.111919 | 5.146972 | 3.77364  | 1.703535 | 1 |
| Cd52      | 8.93973  | 12.7161  | 12.40022 | 12.55816 | 3.776372 | 3.460494 | 2 |
| Lrrc8e    | 2.576156 | 6.364617 | 5.296657 | 5.830637 | 3.788461 | 2.720501 | 2 |
| Emp3      | 6.506815 | 10.30013 | 9.405634 | 9.852884 | 3.793318 | 2.898819 | 2 |
| Phf11d    | 4.831141 | 8.627046 | 7.632994 | 8.13002  | 3.795906 | 2.801853 | 2 |
| Pole2     | 4.126478 | 7.926006 | 6.9691   | 7.447553 | 3.799528 | 2.842622 | 2 |
| Cd300lb   | 2.68159  | 6.487355 | 5.897438 | 6.192396 | 3.805765 | 3.215848 | 2 |

|           |          |          |          |          |          |          |   |
|-----------|----------|----------|----------|----------|----------|----------|---|
|           | 2.321946 | 6.128534 | 7.345069 | 6.736802 | 3.806588 | 5.023123 | 2 |
| Kif11     | 2.904496 | 6.711464 | 5.939971 | 6.325717 | 3.806968 | 3.035475 | 2 |
| Gsta2     | 4.04216  | 7.853633 | 6.147291 | 7.000462 | 3.811473 | 2.105131 | 2 |
| Ifit3     | 9.63481  | 13.46055 | 12.41754 | 12.93904 | 3.825737 | 2.782733 | 2 |
| B430306NC | 5.457842 | 9.284272 | 8.795175 | 9.039724 | 3.82643  | 3.337333 | 2 |
|           | 2.321946 | 6.14884  | 4.840584 | 5.494712 | 3.826894 | 2.518638 | 2 |
| Traf3ip2  | 3.362499 | 7.19041  | 4.225315 | 5.707862 | 3.827912 | 0.862816 | 1 |
|           | 2.331862 | 6.159999 | 4.734527 | 5.447263 | 3.828137 | 2.402664 | 2 |
| F13a1     | 7.080475 | 10.91394 | 9.642916 | 10.27843 | 3.83346  | 2.562441 | 2 |
| Stab1     | 9.539639 | 13.38218 | 12.54553 | 12.96385 | 3.842543 | 3.005888 | 2 |
| Cd68      | 11.48451 | 15.33826 | 15.03902 | 15.18864 | 3.853752 | 3.554515 | 2 |
| Lgr6      | 4.189323 | 8.046094 | 4.402774 | 6.224434 | 3.856771 | 0.213451 | 1 |
| Il1b      | 6.601695 | 10.45935 | 9.716103 | 10.08773 | 3.857653 | 3.114408 | 2 |
| Spn       | 3.100642 | 6.958526 | 7.152792 | 7.055659 | 3.857883 | 4.05215  | 2 |
| Vim       | 12.98752 | 16.84669 | 16.93635 | 16.89152 | 3.85917  | 3.948831 | 2 |
| A530064DC | 4.561174 | 8.422435 | 7.780693 | 8.101564 | 3.861261 | 3.219519 | 2 |
| 2310001H1 | 2.321946 | 6.190218 | 4.960238 | 5.575228 | 3.868271 | 2.638291 | 2 |
| Egfbp2    | 3.649993 | 7.518767 | 8.527091 | 8.022929 | 3.868774 | 4.877098 | 2 |
| Gm10639   | 2.48493  | 6.377581 | 4.819971 | 5.598776 | 3.892651 | 2.335041 | 2 |
| Top2a     | 4.469188 | 8.368163 | 7.378306 | 7.873235 | 3.898975 | 2.909118 | 2 |
| Hoxb4     | 2.364146 | 6.264794 | 5.976301 | 6.120547 | 3.900648 | 3.612155 | 2 |
| Cd68      | 3.773002 | 7.674763 | 6.911048 | 7.292906 | 3.901761 | 3.138046 | 2 |
| Spdl1     | 2.355533 | 6.270333 | 5.257711 | 5.764022 | 3.914801 | 2.902178 | 2 |
| Birc5     | 8.628631 | 12.54501 | 12.11479 | 12.3299  | 3.916379 | 3.48616  | 2 |
| Tagln2    | 3.727262 | 7.646295 | 6.517207 | 7.081751 | 3.919033 | 2.789946 | 2 |
| Apobec3   | 2.591584 | 6.510992 | 5.426337 | 5.968665 | 3.919408 | 2.834753 | 2 |
| 5430402E1 | 6.189259 | 10.12062 | 5.539563 | 7.830091 | 3.931359 | -0.6497  | 1 |
|           | 2.437775 | 6.373049 | 5.545512 | 5.959281 | 3.935274 | 3.107737 | 2 |
| AA467197  | 6.306467 | 10.24358 | 10.13586 | 10.18972 | 3.937108 | 3.829396 | 2 |
| Rrbp1     | 6.669122 | 10.60727 | 9.669633 | 10.13845 | 3.938143 | 3.000511 | 2 |
| Ccl8      | 7.226888 | 11.16693 | 10.02865 | 10.59779 | 3.940045 | 2.80176  | 2 |
| Pira11    | 4.167881 | 8.115021 | 7.187678 | 7.65135  | 3.94714  | 3.019797 | 2 |
| C4b       | 11.23082 | 15.18213 | 15.00696 | 15.09454 | 3.951306 | 3.776134 | 2 |
| Clic1     | 10.18891 | 14.14273 | 13.35785 | 13.75029 | 3.953827 | 3.168943 | 2 |
| Pttg1     | 8.21968  | 12.17711 | 12.01641 | 12.09676 | 3.957433 | 3.796734 | 2 |
| Rrm2      | 8.936535 | 12.89612 | 13.13275 | 13.01444 | 3.959586 | 4.196219 | 2 |
| P2ry10    | 2.337373 | 6.303284 | 5.514442 | 5.908863 | 3.965911 | 3.177069 | 2 |
| Gm5637    | 8.668887 | 12.63691 | 11.55671 | 12.09681 | 3.968022 | 2.887821 | 2 |
| Krtap11-1 | 4.507318 | 8.478719 | 8.074434 | 8.276577 | 3.971401 | 3.567116 | 2 |
| H19       | 8.158043 | 12.13895 | 12.43686 | 12.28791 | 3.980909 | 4.278817 | 2 |
| Slfn10-ps | 2.321946 | 6.305563 | 5.718235 | 6.011899 | 3.983617 | 3.396289 | 2 |
| Ms4a7     | 8.507145 | 12.49364 | 13.01642 | 12.75503 | 3.986496 | 4.509274 | 2 |
| Pira2     | 5.829818 | 9.820174 | 8.913713 | 9.366943 | 3.990356 | 3.083894 | 2 |
| Lcp1      | 9.387635 | 13.38323 | 12.3726  | 12.87791 | 3.995591 | 2.984963 | 2 |
| Ulbp1     | 2.709793 | 6.710206 | 5.766321 | 6.238263 | 4.000413 | 3.056527 | 2 |
| Phf11a    | 7.166632 | 11.17239 | 10.49964 | 10.83601 | 4.005756 | 3.333003 | 2 |
| Gm10754   | 2.867238 | 6.88295  | 7.058242 | 6.970596 | 4.015712 | 4.191005 | 2 |

|           |          |          |          |          |          |          |   |
|-----------|----------|----------|----------|----------|----------|----------|---|
| Klra23    | 2.321946 | 6.338527 | 6.306467 | 6.322497 | 4.016581 | 3.984521 | 2 |
| Ly6a      | 8.406854 | 12.42368 | 10.65963 | 11.54166 | 4.016828 | 2.252774 | 2 |
| Oasl2     | 9.20155  | 13.22407 | 12.96466 | 13.09437 | 4.022522 | 3.763114 | 2 |
| Ube2c     | 5.699586 | 9.726245 | 8.98349  | 9.354868 | 4.026659 | 3.283904 | 2 |
| 543042701 | 4.016737 | 8.044155 | 7.964809 | 8.004482 | 4.027419 | 3.948073 | 2 |
| Rab32     | 7.617288 | 11.64549 | 11.5044  | 11.57494 | 4.028206 | 3.887108 | 2 |
|           | 3.135464 | 7.165625 | 6.016818 | 6.591221 | 4.030161 | 2.881354 | 2 |
| Ripk3     | 5.570165 | 9.608765 | 8.863254 | 9.23601  | 4.0386   | 3.293089 | 2 |
| Bhmt      | 2.646495 | 6.693697 | 4.953254 | 5.823475 | 4.047202 | 2.306759 | 2 |
| Plin2     | 9.411536 | 13.46287 | 12.93859 | 13.20073 | 4.051331 | 3.527051 | 2 |
| Gm10872   | 3.111584 | 7.174477 | 4.819069 | 5.996773 | 4.062893 | 1.707485 | 1 |
| Raet1e    | 5.655408 | 9.72206  | 9.104154 | 9.413107 | 4.066652 | 3.448746 | 2 |
| Arl11     | 4.647755 | 8.717217 | 8.431245 | 8.574231 | 4.069462 | 3.78349  | 2 |
| Plbd1     | 7.235102 | 11.30854 | 10.62391 | 10.96622 | 4.073433 | 3.388806 | 2 |
| H2-Ea-ps  | 2.321946 | 6.396645 | 5.322367 | 5.859506 | 4.074699 | 3.000421 | 2 |
| Folr2     | 4.849729 | 8.9279   | 9.048502 | 8.988201 | 4.078171 | 4.198773 | 2 |
| Dlk1      | 6.184279 | 10.28408 | 9.543523 | 9.913802 | 4.099801 | 3.359244 | 2 |
| Calml4    | 2.856133 | 6.959771 | 6.544341 | 6.752056 | 4.103638 | 3.688208 | 2 |
| Acox2     | 2.625469 | 6.730751 | 6.627842 | 6.679297 | 4.105282 | 4.002373 | 2 |
| Myo1f     | 6.084576 | 10.2008  | 9.365484 | 9.783143 | 4.116226 | 3.280908 | 2 |
| Slc16a10  | 4.279945 | 8.398841 | 7.572394 | 7.985618 | 4.118896 | 3.292449 | 2 |
| Nts       | 6.930906 | 11.05782 | 10.27219 | 10.665   | 4.126911 | 3.341286 | 2 |
| Ankle1    | 2.934237 | 7.064787 | 6.535786 | 6.800287 | 4.13055  | 3.601549 | 2 |
| Mx1       | 6.611237 | 10.74496 | 10.22113 | 10.48304 | 4.13372  | 3.609891 | 2 |
| 5830428M  | 2.321946 | 6.457978 | 4.742189 | 5.600083 | 4.136032 | 2.420242 | 2 |
| H60a      | 5.329917 | 9.471724 | 9.334556 | 9.40314  | 4.141807 | 4.004639 | 2 |
| Gdf3      | 2.395653 | 6.558903 | 8.096669 | 7.327786 | 4.16325  | 5.701016 | 2 |
| Fyb       | 6.28358  | 10.46282 | 10.09612 | 10.27947 | 4.179237 | 3.812541 | 2 |
| Oas2      | 6.287771 | 10.48225 | 9.696361 | 10.0893  | 4.194477 | 3.40859  | 2 |
| Ccnb1     | 2.615006 | 6.812695 | 5.643567 | 6.228131 | 4.197689 | 3.02856  | 2 |
| Prl       | 6.076541 | 10.27695 | 4.358704 | 7.317825 | 4.200405 | -1.71784 | 1 |
| Sbno2     | 5.540288 | 9.743476 | 9.074317 | 9.408897 | 4.203188 | 3.534029 | 2 |
| Cdkn2a    | 4.510102 | 8.720634 | 8.722906 | 8.72177  | 4.210532 | 4.212804 | 2 |
| Igsf6     | 5.610189 | 9.821174 | 9.936178 | 9.878676 | 4.210985 | 4.325989 | 2 |
| Ticrr     | 3.438744 | 7.664337 | 7.445373 | 7.554855 | 4.225593 | 4.006629 | 2 |
| Oas1a     | 8.137602 | 12.36462 | 11.75921 | 12.06192 | 4.227021 | 3.621605 | 2 |
| Serpine1  | 7.94639  | 12.18035 | 11.70296 | 11.94165 | 4.233962 | 3.756567 | 2 |
| H2-Eb1    | 8.143446 | 12.38251 | 11.81274 | 12.09763 | 4.239065 | 3.669293 | 2 |
| Fam111a   | 5.615768 | 9.856428 | 8.801633 | 9.329031 | 4.240661 | 3.185866 | 2 |
| Tnfaip2   | 3.721736 | 7.967687 | 7.501807 | 7.734747 | 4.245951 | 3.780071 | 2 |
|           | 5.177471 | 9.426436 | 5.004877 | 7.215657 | 4.248965 | -0.17259 | 1 |
| Slc28a2   | 2.883745 | 7.133456 | 5.644267 | 6.388862 | 4.249711 | 2.760522 | 2 |
| Itln1     | 2.321946 | 6.575535 | 6.26145  | 6.418493 | 4.253589 | 3.939504 | 2 |
| Ercc6l    | 2.978599 | 7.261239 | 6.58751  | 6.924374 | 4.28264  | 3.608911 | 2 |
| Ccnb1     | 7.029758 | 11.31634 | 11.63414 | 11.47524 | 4.286579 | 4.604379 | 2 |
| Glipr1    | 5.482023 | 9.775534 | 9.071061 | 9.423298 | 4.293511 | 3.589038 | 2 |
| Flncl     | 6.142378 | 10.45183 | 9.723146 | 10.08749 | 4.309456 | 3.580768 | 2 |

|           |          |          |          |          |          |          |   |
|-----------|----------|----------|----------|----------|----------|----------|---|
| Isg15     | 8.122033 | 12.43192 | 11.39853 | 11.91523 | 4.309891 | 3.276494 | 2 |
| Runx1     | 3.423645 | 7.735088 | 6.872861 | 7.303975 | 4.311443 | 3.449216 | 2 |
| Ccl9      | 7.854286 | 12.16632 | 10.63804 | 11.40218 | 4.312034 | 2.783749 | 2 |
| Depdc1a   | 2.321946 | 6.65196  | 6.497493 | 6.574727 | 4.330014 | 4.175547 | 2 |
| Kif18b    | 2.690963 | 7.021441 | 6.904709 | 6.963075 | 4.330477 | 4.213746 | 2 |
| Mvp       | 2.331395 | 6.671515 | 4.581398 | 5.626457 | 4.34012  | 2.250003 | 2 |
| Ambp      | 2.895731 | 7.236942 | 5.25558  | 6.246261 | 4.341212 | 2.35985  | 2 |
| Cdca3     | 6.955469 | 11.29831 | 11.10735 | 11.20283 | 4.342839 | 4.151881 | 2 |
| Gm7897    | 2.321946 | 6.681821 | 5.83544  | 6.258631 | 4.359875 | 3.513494 | 2 |
|           | 3.261003 | 7.627468 | 6.21617  | 6.921819 | 4.366466 | 2.955168 | 2 |
| 493041201 | 2.321946 | 6.707814 | 7.434107 | 7.07096  | 4.385868 | 5.112161 | 2 |
| Dmbx1     | 3.638995 | 8.028762 | 8.011986 | 8.020374 | 4.389767 | 4.372991 | 2 |
| Lmx1a     | 2.321946 | 6.714228 | 5.879129 | 6.296678 | 4.392282 | 3.557182 | 2 |
| Clec7a    | 5.881224 | 10.28096 | 11.64449 | 10.96272 | 4.399736 | 5.763265 | 2 |
| Atf3      | 5.538818 | 9.965982 | 9.06525  | 9.515616 | 4.427164 | 3.526432 | 2 |
| Bcl2a1c   | 5.63138  | 10.06564 | 8.963172 | 9.514406 | 4.434259 | 3.331792 | 2 |
| Pf4       | 9.215379 | 13.65326 | 11.77062 | 12.71194 | 4.437881 | 2.555243 | 2 |
| Usp18     | 6.637613 | 11.07676 | 10.42821 | 10.75249 | 4.439151 | 3.790593 | 2 |
| Runx1     | 2.321946 | 6.766371 | 5.885068 | 6.32572  | 4.444425 | 3.563122 | 2 |
| Msr1      | 3.404036 | 7.860695 | 5.61276  | 6.736728 | 4.45666  | 2.208724 | 2 |
| Thbs1     | 7.978103 | 12.44165 | 12.13027 | 12.28596 | 4.463545 | 4.152165 | 2 |
| Hba-a1    | 8.884841 | 13.3609  | 12.25525 | 12.80807 | 4.476062 | 3.370404 | 2 |
| Fam46c    | 5.078012 | 9.556915 | 9.303055 | 9.429985 | 4.478904 | 4.225044 | 2 |
| Lilra6    | 3.617229 | 8.097673 | 7.118805 | 7.608239 | 4.480444 | 3.501576 | 2 |
| Oasl1     | 6.219246 | 10.7031  | 9.777718 | 10.24041 | 4.483854 | 3.558472 | 2 |
| Ifi204    | 7.916805 | 12.4007  | 11.41311 | 11.90691 | 4.483896 | 3.496306 | 2 |
| Lyz1      | 10.61125 | 15.09575 | 15.29775 | 15.19675 | 4.484492 | 4.686491 | 2 |
| Emp1      | 8.62457  | 13.10965 | 12.45567 | 12.78266 | 4.485083 | 3.831098 | 2 |
| 1190002F1 | 3.711034 | 8.200025 | 8.486302 | 8.343164 | 4.488991 | 4.775268 | 2 |
| Sirpb1b   | 2.426159 | 6.915706 | 5.124626 | 6.020166 | 4.489547 | 2.698467 | 2 |
| Sell      | 3.971081 | 8.480701 | 6.957253 | 7.718977 | 4.50962  | 2.986172 | 2 |
| Hpgds     | 2.836513 | 7.346236 | 6.341929 | 6.844083 | 4.509723 | 3.505417 | 2 |
| Phc3      | 3.556323 | 8.069338 | 4.453341 | 6.261339 | 4.513015 | 0.897018 | 1 |
| Hba-a2    | 12.29083 | 16.8059  | 16.40463 | 16.60527 | 4.515079 | 4.113802 | 2 |
| 4831440D2 | 2.412836 | 6.939133 | 7.400034 | 7.169583 | 4.526297 | 4.987198 | 2 |
| Ermard    | 3.217188 | 7.745626 | 7.245854 | 7.49574  | 4.528438 | 4.028666 | 2 |
| Cd72      | 5.212654 | 9.752955 | 8.921711 | 9.337333 | 4.540301 | 3.709057 | 2 |
| Ear12     | 3.527761 | 8.097189 | 5.233796 | 6.665492 | 4.569428 | 1.706035 | 1 |
| Clspn     | 2.321946 | 6.906506 | 6.504234 | 6.70537  | 4.58456  | 4.182288 | 2 |
| Hspb8     | 2.321946 | 6.907215 | 5.954687 | 6.430951 | 4.585269 | 3.632741 | 2 |
| Lhx5      | 2.612121 | 7.207008 | 7.040993 | 7.124001 | 4.594887 | 4.428872 | 2 |
| Bst1      | 5.786123 | 10.38514 | 10.19059 | 10.28786 | 4.599012 | 4.404464 | 2 |
| Gfap      | 10.2009  | 14.802   | 15.15693 | 14.97947 | 4.601105 | 4.956039 | 2 |
| Sgol1     | 4.460118 | 9.068333 | 9.321898 | 9.195116 | 4.608215 | 4.86178  | 2 |
| Krt85     | 4.484685 | 9.093214 | 8.679662 | 8.886438 | 4.60853  | 4.194978 | 2 |
| Runx3     | 2.321946 | 6.939363 | 7.542188 | 7.240775 | 4.617417 | 5.220242 | 2 |
| Phf11d    | 7.636307 | 12.25854 | 11.567   | 11.91277 | 4.622229 | 3.930689 | 2 |



|           |          |          |          |          |          |          |   |
|-----------|----------|----------|----------|----------|----------|----------|---|
| Vav1      | 3.420227 | 8.0562   | 6.942785 | 7.499493 | 4.635973 | 3.522558 | 2 |
| Gm16340   | 4.353053 | 8.994915 | 7.957366 | 8.47614  | 4.641862 | 3.604313 | 2 |
| Cdca5     | 5.459639 | 10.10197 | 10.12721 | 10.11459 | 4.642328 | 4.667574 | 2 |
| Bcl3      | 7.389777 | 12.03525 | 11.22945 | 11.63235 | 4.645468 | 3.839675 | 2 |
| Slco1a5   | 2.792795 | 7.439921 | 6.47493  | 6.957426 | 4.647127 | 3.682136 | 2 |
| Ifi44     | 6.098218 | 10.76067 | 10.71333 | 10.737   | 4.662452 | 4.61511  | 2 |
| Zbp1      | 2.321946 | 6.995926 | 5.543238 | 6.269582 | 4.67398  | 3.221292 | 2 |
| Clec4e    | 3.257571 | 7.945657 | 6.21578  | 7.080719 | 4.688086 | 2.958209 | 2 |
| Foxb1     | 2.496845 | 7.199447 | 8.295418 | 7.747432 | 4.702602 | 5.798573 | 2 |
| Prc1      | 7.741385 | 12.44776 | 12.67407 | 12.56092 | 4.706376 | 4.932684 | 2 |
| Ms4a6c    | 4.125388 | 8.834935 | 7.780922 | 8.307929 | 4.709547 | 3.655535 | 2 |
| Cd180     | 3.470227 | 8.195115 | 7.608314 | 7.901715 | 4.724888 | 4.138087 | 2 |
| Nusap1    | 4.980882 | 9.720663 | 9.642123 | 9.681393 | 4.739781 | 4.661241 | 2 |
| C5ar1     | 2.321946 | 7.063    | 5.520388 | 6.291694 | 4.741054 | 3.198442 | 2 |
| Otx2      | 6.363803 | 11.1091  | 11.08804 | 11.09857 | 4.745292 | 4.724237 | 2 |
| Mnda      | 3.545402 | 8.294918 | 7.999777 | 8.147348 | 4.749516 | 4.454375 | 2 |
| S100a9    | 8.968813 | 13.7186  | 11.41377 | 12.56619 | 4.749791 | 2.444953 | 2 |
| Clhc1     | 2.327824 | 7.093504 | 5.942686 | 6.518095 | 4.76568  | 3.614862 | 2 |
| Gm9564    | 2.447361 | 7.21588  | 4.437554 | 5.826717 | 4.768519 | 1.990193 | 1 |
| Hbb-b1    | 2.321946 | 7.096067 | 7.505262 | 7.300665 | 4.774121 | 5.183316 | 2 |
| Sucnr1    | 2.321946 | 7.097952 | 6.570952 | 6.834452 | 4.776006 | 4.249006 | 2 |
| Ccl6      | 7.540682 | 12.34065 | 10.56096 | 11.4508  | 4.799966 | 3.020279 | 2 |
|           | 2.321946 | 7.130345 | 6.104575 | 6.61746  | 4.808399 | 3.782629 | 2 |
| Hbb-bt    | 8.881736 | 13.71074 | 13.21171 | 13.46123 | 4.829006 | 4.329975 | 2 |
| Kif2c     | 2.469024 | 7.304216 | 7.063572 | 7.183894 | 4.835192 | 4.594548 | 2 |
| 1700057Hz | 2.454111 | 7.293009 | 4.158355 | 5.725682 | 4.838898 | 1.704244 | 1 |
| Bcl2a1d   | 8.478631 | 13.32652 | 12.66355 | 12.99503 | 4.847887 | 4.18492  | 2 |
| Tlr2      | 7.122967 | 11.98053 | 12.04417 | 12.01235 | 4.857564 | 4.921199 | 2 |
| Fcgr4     | 6.009414 | 10.88356 | 10.93902 | 10.91129 | 4.874142 | 4.929607 | 2 |
| Birc5     | 2.321946 | 7.202194 | 6.271524 | 6.736859 | 4.880248 | 3.949577 | 2 |
| Hmox1     | 8.402444 | 13.29632 | 10.69932 | 11.99782 | 4.893877 | 2.296876 | 2 |
| S100a8    | 5.922737 | 10.84648 | 8.97815  | 9.912317 | 4.923747 | 3.055413 | 2 |
| Capg      | 8.877847 | 13.87461 | 13.06997 | 13.47229 | 4.996765 | 4.192125 | 2 |
| Niacr1    | 3.21255  | 8.235978 | 7.885221 | 8.0606   | 5.023428 | 4.672671 | 2 |
| Six3os1   | 2.321946 | 7.353238 | 5.239833 | 6.296536 | 5.031292 | 2.917887 | 2 |
| Epyc      | 2.321946 | 7.366474 | 7.699582 | 7.533028 | 5.044528 | 5.377636 | 2 |
| Cd109     | 4.391962 | 9.468288 | 9.443654 | 9.455971 | 5.076326 | 5.051692 | 2 |
| Fyb       | 2.321946 | 7.399306 | 6.530154 | 6.96473  | 5.07736  | 4.208208 | 2 |
| Gm5150    | 2.321946 | 7.405962 | 5.598346 | 6.502154 | 5.084016 | 3.2764   | 2 |
| C3        | 6.485878 | 11.57041 | 10.92755 | 11.24898 | 5.084534 | 4.441675 | 2 |
| Exoc4     | 2.321946 | 7.416395 | 4.605964 | 6.011179 | 5.094449 | 2.284018 | 2 |
| Tk1       | 7.291297 | 12.39561 | 11.90628 | 12.15095 | 5.104315 | 4.614987 | 2 |
| Mcam      | 2.444655 | 7.582358 | 4.68404  | 6.133199 | 5.137703 | 2.239384 | 2 |
| Gp49a     | 4.776754 | 9.916487 | 8.610421 | 9.263454 | 5.139733 | 3.833667 | 2 |
| Serpina3f | 7.571765 | 12.73935 | 11.71083 | 12.22509 | 5.167589 | 4.139061 | 2 |
| Tubb6     | 9.524169 | 14.70168 | 13.73936 | 14.22052 | 5.177515 | 4.215187 | 2 |
| Serpina3i | 2.321946 | 7.503058 | 6.809274 | 7.156166 | 5.181111 | 4.487328 | 2 |

|           |          |          |          |          |          |          |   |
|-----------|----------|----------|----------|----------|----------|----------|---|
| Ifi27l2a  | 9.129286 | 14.31062 | 14.04306 | 14.17684 | 5.181334 | 4.913777 | 2 |
| Serpina3n | 6.350777 | 11.53556 | 10.87842 | 11.20699 | 5.184778 | 4.527641 | 2 |
| Gfap      | 9.368104 | 14.55593 | 14.06189 | 14.30891 | 5.187826 | 4.693781 | 2 |
| Gm5483    | 2.321946 | 7.529084 | 4.657156 | 6.09312  | 5.207138 | 2.335209 | 2 |
| Mki67     | 7.734114 | 12.94672 | 12.53382 | 12.74027 | 5.212606 | 4.799709 | 2 |
| Ms4a6d    | 8.03907  | 13.30204 | 12.05214 | 12.67709 | 5.262972 | 4.013073 | 2 |
| Pirb      | 6.113555 | 11.40323 | 10.47195 | 10.93759 | 5.289673 | 4.358392 | 2 |
| Spink8    | 6.411673 | 11.75679 | 11.91833 | 11.83756 | 5.345113 | 5.506653 | 2 |
| Hbb-b2    | 7.178608 | 12.52585 | 11.58245 | 12.05415 | 5.347238 | 4.403837 | 2 |
| Ms4a4c    | 5.414117 | 10.76595 | 9.571191 | 10.16857 | 5.351836 | 4.157074 | 2 |
| Scgb3a1   | 6.305908 | 11.66899 | 10.4487  | 11.05884 | 5.363083 | 4.142789 | 2 |
| Zfp870    | 2.405993 | 7.777804 | 5.428305 | 6.603054 | 5.371811 | 3.022312 | 2 |
| Uhrf1     | 6.2635   | 11.64174 | 10.66653 | 11.15413 | 5.378236 | 4.403033 | 2 |
| Neil3     | 3.859923 | 9.260019 | 9.410253 | 9.335136 | 5.400096 | 5.55033  | 2 |
| Tuba1c    | 9.653374 | 15.10358 | 14.20001 | 14.65179 | 5.450201 | 4.546638 | 2 |
| Speer4f   | 2.325415 | 7.789637 | 4.13974  | 5.964688 | 5.464222 | 1.814325 | 1 |
| Sprr1a    | 5.743171 | 11.20957 | 11.1181  | 11.16384 | 5.466403 | 5.374931 | 2 |
| Saa3      | 3.130089 | 8.639325 | 7.371207 | 8.005266 | 5.509236 | 4.241118 | 2 |
| Gpr65     | 5.146321 | 10.65826 | 10.2254  | 10.44183 | 5.511937 | 5.079075 | 2 |
| Oas1a     | 2.321946 | 7.857028 | 6.561229 | 7.209128 | 5.535081 | 4.239283 | 2 |
| Birc5     | 2.321946 | 7.859712 | 6.61928  | 7.239496 | 5.537766 | 4.297334 | 2 |
| Bub1      | 4.742132 | 10.36097 | 10.20818 | 10.28458 | 5.61884  | 5.466047 | 2 |
| Ccl11     | 2.321946 | 7.942876 | 6.205253 | 7.074065 | 5.62093  | 3.883307 | 2 |
| Tuba1c    | 9.486183 | 15.10816 | 14.14957 | 14.62887 | 5.621978 | 4.663387 | 2 |
| Defa-rs4  | 2.321946 | 7.969515 | 10.12291 | 9.04621  | 5.647569 | 7.800959 | 2 |
| Wfdc17    | 6.937782 | 12.59018 | 12.32028 | 12.45523 | 5.652397 | 5.382498 | 2 |
| Pbk       | 4.730664 | 10.39207 | 10.50772 | 10.44989 | 5.661408 | 5.777051 | 2 |
| Htr2b     | 5.333921 | 11.00421 | 11.00665 | 11.00543 | 5.67029  | 5.67273  | 2 |
| F10       | 2.321946 | 8.000334 | 6.511964 | 7.256149 | 5.678388 | 4.190018 | 2 |
| Barhl1    | 2.321946 | 8.020822 | 8.056112 | 8.038467 | 5.698876 | 5.734166 | 2 |
| Ttr       | 8.705602 | 14.40537 | 10.44094 | 12.42315 | 5.699767 | 1.735338 | 1 |
|           | 5.740782 | 11.4544  | 11.09496 | 11.27468 | 5.713615 | 5.354179 | 2 |
| Ccr2      | 3.207757 | 8.93973  | 7.715959 | 8.327844 | 5.731973 | 4.508202 | 2 |
| Lgals3    | 9.534405 | 15.28871 | 14.99164 | 15.14018 | 5.754308 | 5.457233 | 2 |
| Lyz2      | 3.924382 | 9.687294 | 9.202723 | 9.445009 | 5.762913 | 5.278342 | 2 |
| 4921501E0 | 2.321946 | 8.116536 | 4.022857 | 6.069697 | 5.79459  | 1.700911 | 1 |
| Pira7     | 2.89391  | 8.771615 | 7.889115 | 8.330365 | 5.877705 | 4.995205 | 2 |
| Il6       | 3.662108 | 9.616342 | 6.619667 | 8.118005 | 5.954234 | 2.957559 | 2 |
| Bpifb9b   | 6.1241   | 12.09546 | 5.830256 | 8.962856 | 5.971355 | -0.29384 | 1 |
| Xdh       | 2.686639 | 8.683444 | 7.178089 | 7.930766 | 5.996805 | 4.49145  | 2 |
| Ska1      | 2.321946 | 8.430203 | 7.943782 | 8.186992 | 6.108256 | 5.621836 | 2 |
| Ccl4      | 4.520998 | 10.65081 | 9.152034 | 9.901423 | 6.129815 | 4.631037 | 2 |
| Bub1b     | 2.321946 | 8.454771 | 7.659288 | 8.05703  | 6.132825 | 5.337342 | 2 |
| Irx2      | 2.321946 | 8.506549 | 10.0776  | 9.292072 | 6.184603 | 7.755649 | 2 |
| Plac8     | 4.471699 | 10.69482 | 9.198543 | 9.946682 | 6.223122 | 4.726844 | 2 |
| Cd300lf   | 4.828348 | 11.05243 | 10.55689 | 10.80466 | 6.224086 | 5.728543 | 2 |
| Ccl3      | 5.620061 | 11.84656 | 11.13785 | 11.49221 | 6.226502 | 5.517788 | 2 |

|          |          |          |          |          |          |          |   |
|----------|----------|----------|----------|----------|----------|----------|---|
| Mki67    | 6.308561 | 12.55845 | 12.09831 | 12.32838 | 6.249889 | 5.789744 | 2 |
| Hal      | 5.807334 | 12.06757 | 11.34215 | 11.70486 | 6.260241 | 5.53482  | 2 |
| Mmp3     | 2.508593 | 8.772577 | 7.074064 | 7.923321 | 6.263984 | 4.565472 | 2 |
| Gm10693  | 2.626297 | 8.907706 | 7.957809 | 8.432758 | 6.281409 | 5.331512 | 2 |
| Ifi204   | 5.205355 | 11.49373 | 10.2357  | 10.86472 | 6.288373 | 5.030349 | 2 |
| Al607873 | 5.538768 | 11.84204 | 10.84488 | 11.34346 | 6.303269 | 5.306108 | 2 |
| Fam64a   | 2.337292 | 8.668513 | 8.252243 | 8.460378 | 6.331221 | 5.914951 | 2 |
| Gata3    | 2.321946 | 8.750637 | 8.540651 | 8.645644 | 6.428691 | 6.218705 | 2 |
| Cd84     | 2.446463 | 8.934232 | 8.755957 | 8.845095 | 6.487769 | 6.309494 | 2 |
| Cdk1     | 3.920186 | 10.413   | 10.13697 | 10.27499 | 6.492818 | 6.216783 | 2 |
| Chi3l3   | 4.589004 | 11.10105 | 8.868469 | 9.984758 | 6.512044 | 4.279465 | 2 |
| Apoc2    | 4.343053 | 10.91604 | 11.34679 | 11.13141 | 6.572982 | 7.003739 | 2 |
| Isg15    | 2.321946 | 8.932481 | 7.775846 | 8.354164 | 6.610535 | 5.4539   | 2 |
|          | 2.321946 | 9.014681 | 7.268009 | 8.141345 | 6.692735 | 4.946063 | 2 |
| Timp1    | 7.895268 | 14.63889 | 14.03737 | 14.33813 | 6.743622 | 6.142105 | 2 |
| Cst7     | 2.321946 | 9.090309 | 11.00029 | 10.0453  | 6.768363 | 8.67834  | 2 |
| Cd300lf  | 4.109138 | 10.88603 | 10.41485 | 10.65044 | 6.776894 | 6.30571  | 2 |
|          | 2.35657  | 9.190331 | 9.489768 | 9.34005  | 6.833762 | 7.133199 | 2 |
| Gpnmb    | 2.321946 | 9.195655 | 9.7163   | 9.455978 | 6.873709 | 7.394354 | 2 |
| Glycam1  | 2.321946 | 9.219595 | 9.310372 | 9.264984 | 6.897649 | 6.988426 | 2 |
| Lilrb4   | 3.067175 | 10.00439 | 8.692109 | 9.348249 | 6.937214 | 5.624934 | 2 |
| Clec4d   | 3.415324 | 10.40875 | 9.047876 | 9.728314 | 6.993427 | 5.632552 | 2 |
| Ptx3     | 2.348821 | 9.348515 | 7.6367   | 8.492608 | 6.999694 | 5.287879 | 2 |
| Ifi202b  | 6.727336 | 13.84949 | 13.20183 | 13.52566 | 7.122155 | 6.474495 | 2 |
| Cd5l     | 2.321946 | 9.525196 | 10.59271 | 10.05895 | 7.20325  | 8.270766 | 2 |
| Ch25h    | 5.240527 | 12.5545  | 10.67748 | 11.61599 | 7.313975 | 5.436955 | 2 |
| Ccl12    | 7.700351 | 15.03989 | 12.91615 | 13.97802 | 7.339535 | 5.2158   | 2 |
| Nxpe5    | 2.400713 | 9.887712 | 8.306361 | 9.097037 | 7.487    | 5.905649 | 2 |
| Cxcl10   | 5.290907 | 12.92086 | 12.63549 | 12.77818 | 7.629951 | 7.344586 | 2 |
| Ifi202b  | 5.35554  | 13.00944 | 12.31871 | 12.66408 | 7.653902 | 6.963173 | 2 |
| Cd44     | 2.333626 | 9.994813 | 9.397787 | 9.6963   | 7.661187 | 7.064161 | 2 |
| Lilrb4   | 7.316217 | 15.14401 | 14.23583 | 14.68992 | 7.827795 | 6.919617 | 2 |
| Sirpb1b  | 2.479654 | 10.3874  | 8.836938 | 9.612169 | 7.907746 | 6.357284 | 2 |
| Ccl7     | 2.519969 | 10.71386 | 8.474164 | 9.594013 | 8.193894 | 5.954196 | 2 |
| Ccl2     | 5.458406 | 13.69781 | 11.25149 | 12.47465 | 8.239402 | 5.793087 | 2 |
| Tgm1     | 4.223104 | 12.60925 | 10.41142 | 11.51033 | 8.386145 | 6.188316 | 2 |
| Lcn2     | 7.088558 | 15.70827 | 13.42909 | 14.56868 | 8.619713 | 6.340527 | 2 |
| Spp1     | 5.593692 | 14.31847 | 13.3871  | 13.85278 | 8.724775 | 7.793404 | 2 |
| Msr1     | 2.502357 | 13.30658 | 11.65079 | 12.47869 | 10.80422 | 9.148437 | 2 |
